# Supplementary material for: Mutational signatures reveal ternary relationships between homologous recombination repair, APOBEC, and mismatch repair in gynecological cancers
Source: Springer Nature journal article supplement (doi:10.1186/s12967-022-03259-0), 2022-02-02

## **Additional File 1**

**Mutational signatures reveal ternary relationships between homologous recombination repair, APOBEC and mismatch repair in gynecological cancers**

Amir Farmanbar<sup>1\*</sup>, Sanaz Firouzi<sup>2\*#</sup>, Robert Kneller<sup>3</sup>, Hossein Khiabani<sup>1,4#</sup>

<sup>1</sup>Center for Systems and Computational Biology, Rutgers Cancer Institute of New Jersey, Rutgers University, New Brunswick, NJ, 08903, USA

<sup>2</sup>Institute for Cancer Genetics, Columbia University, New York, NY 10032, USA

<sup>3</sup>Research Center for Advanced Science and Technology, University of Tokyo, Minato-ku, Tokyo, 153-8904, Japan

<sup>4</sup>Department of Pathology and Laboratory Medicine, Rutgers Robert Wood Johnson Medical School, Rutgers University, New Brunswick, NJ, 08903, USA

## SUPPLEMENTARY FIGURE LEGENDS

**Fig. S1: Dominant signature analysis of UCEC whole genomes.** (a) The first and second dominant SBS mutational signatures (b) The first and second dominant ID mutational signatures (c) The first and second dominant DBS mutational signatures Dominant signatures were based on the contribution value of detected mutational signatures. For mutational signatures with known etiology, both signature and etiology are indicated.

**Fig. S2: Dominant signature analysis of UCEC exomes.** (a) The first and second dominant SBS mutational signatures (b) The first and second dominant ID mutational signatures (c) The first and second dominant DBS mutational signatures Dominant signatures were based on the contribution value of detected mutational signatures. For mutational signatures with known etiology, both signature and etiology are indicated.

**Fig. S3: Mutational signature analysis of UCEC whole genomes and exomes by multivariate analysis.** (a) Mutational signatures of UCEC whole genomes (b) Interaction of signatures with each other in UCEC whole genomes. (c) Mutational signatures of UCEC exomes. The heatmap is divided based on dominant signature status. The First and second dominant signatures are annotated on the top of each heatmap. The contribution values of each signature are shown by a color scale. Color codes representing each dominant mutational signature are shown.

**Fig. S4: Dominant signature analysis of ovarian WGS tumors.** (a) The first and second dominant SBS mutational signatures (b) The first and second dominant ID mutational signatures (c) The first and second dominant DBS mutational signatures Dominant signatures were based on the contribution value of detected mutational signatures. For mutational signatures with known etiology, both signature and etiology are indicated.

**Fig. S5: Dominant signature analysis of ovarian WES tumors.** (a) The first and second dominant SBS mutational signatures (b) The first and second dominant ID mutational

signatures (c) The first and second dominant DBS mutational signatures Dominant signatures were based on the contribution value of detected mutational signatures. For mutational signatures with known etiology, both signature and etiology are indicated.

**Fig. S6: Mutational signature analysis of ovarian WGS tumors and exomes by multivariate analysis.** (a) Mutational signatures of ovarian tumors' whole genomes (b) Interaction of signatures with each other in ovarian tumors' whole genomes. (c) Mutational signatures of ovarian tumors' exomes. The heatmap is divided based on dominant signature status. The First and second dominant signatures are annotated on the top of each heatmap. The contribution values of each signature are shown by a color scale. Color codes representing each dominant mutational signature are shown.

**Fig. S7: Mutational signature analysis of cervical WGS tumors by NMF-based signature extraction.** (a) Mutational signatures of cervical tumors' whole genomes. The heatmap is divided based on dominant signature status. The First and second dominant signatures are annotated on the top of each heatmap. The contribution values of each signature are shown by a color scale. Color codes representing each dominant mutational signature are shown. (b) TMB of SBS, ID and DBS signatures for cervical tumors' whole genomes. TMB is measured in somatic mutations per Megabase (Mb). In the TMB plots, columns represent the detected mutational signatures and are ordered by mean somatic mutations per Mb from the lowest frequency, left, to the highest frequency, right. Numbers at the bottom of the TMB plots represent the numbers of tumors harboring each mutational signature. Only samples with counts more than zero are shown.

**Fig. S8: Dominant signature analysis of cervical WGS tumors.** (a) The first and second dominant SBS mutational signatures (b) The first and second dominant ID mutational signatures (c) The first and second dominant DBS mutational signatures Dominant signatures were based on the contribution value of detected mutational signatures. For mutational signatures with known etiology, both signature and etiology are indicated.

**Fig. S9: Dominant signature analysis of cervical WES tumors.** (a) The first and second dominant SBS mutational signatures (b) The first and second dominant ID mutational signatures (c) The first and second dominant DBS mutational signatures Dominant signatures were based on the contribution value of detected mutational signatures. For mutational signatures with known etiology, both signature and etiology are indicated.

**Fig. S10: Mutational signature analysis of cervical WGS tumors and exomes by multivariate analysis.** (a) Mutational signatures of cervical tumors' whole genomes. (b) Mutational signatures of cervical tumors' exomes. The heatmap is divided based on dominant signature status. The First and second dominant signatures are annotated on the top of each heatmap. The contribution values of each signature are shown by a color scale. Color codes representing each dominant mutational signature are shown.

**Fig. S11: Comparing survival of patients with APOBEC, HRd and MMRd signatures in UCEC exomes.** (a) Kaplan-Meyer curves representing OS of patients for all signature groups (b) Kaplan-Meyer curves representing OS of patients stratified by harboring MMRd compared to APOBEC and HRd signatures. (c) Kaplan-Meyer curves representing OS of patients stratified by harboring MMRd compared to HRd signatures. (d) Kaplan-Meyer curves representing OS of patients stratified by harboring MMRd compared to APOBEC signatures. (e) Kaplan-Meyer curves representing OS of patients stratified by harboring HRd compared to APOBEC signatures. P values represent the significance determined from log-rank.

**Fig. S12: Comparing survival of patients with APOBEC, HRd and MMRd signatures in ovarian tumors' exomes.** (a) Kaplan-Meyer curves representing OS of patients for all signature groups (b) Kaplan-Meyer curves representing OS of patients stratified by harboring APOBEC, HRd, MMRd signatures compared to the rest of samples. (c) Kaplan-Meyer curves representing OS of patients stratified by harboring HRd compared to other signature group. (d) Kaplan-Meyer curves representing OS of patients stratified by harboring HRd compared to APOBEC signatures. (e) Kaplan-Meyer curves

representing OS of patients stratified by harboring HRd compared to MMRd signatures. **(f)** Kaplan-Meyer curves representing OS of patients stratified by harboring MMRd compared to APOBEC signatures. P values represent the significance determined from log-rank.

**Fig. S13: Comparing survival of patients with APOBEC, HRd and MMRd signatures in cervical tumors' exomes.** **(a)** Kaplan-Meyer curves representing OS of patients for all signature groups **(b)** Kaplan-Meyer curves representing OS of patients stratified by harboring APOBEC compared to HRd signatures **(c)** Kaplan-Meyer curves representing OS of patients stratified by harboring APOBEC compared to MMRd signatures **(d)** Kaplan-Meyer curves representing OS of patients stratified by harboring HRd compared to MMRd signatures. P values represent the significance determined from log-rank.

**Fig. S14: Comparing survival of patients with APOBEC, HRd and MMRd signatures in aggregated UCEC, ovarian and cervical tumors' exomes.** **(a)** Kaplan-Meyer curves representing OS of patients for all signature groups **(b)** Kaplan-Meyer curves representing OS of patients stratified by harboring APOBEC compared to HRd signatures **(c)** Kaplan-Meyer curves representing OS of patients stratified by harboring APOBEC compared to MMRd signatures **(d)** Kaplan-Meyer curves representing OS of patients stratified by harboring HRd compared to MMRd signatures. P values represent the significance determined from log-rank.

**Fig. S15: Mutational signature analysis of uterine cell lines' exomes by NMF-based signature extraction.** **(a)** Mutational signatures of uterine cell lines. The heatmap is divided based on dominant signature status. The First and second dominant signatures are annotated on the top of each heatmap. The contribution values of each signature are shown by a color scale. Color codes representing each dominant mutational signature are shown. **(b)** TMB of SBS, ID and DBS signatures. TMB is measured in somatic mutations per Megabase (Mb). In the TMB plots, columns represent the detected mutational

signatures and are ordered by mean somatic mutations per Mb from the lowest frequency, left, to the highest frequency, right. Numbers at the bottom of the TMB plots represent the numbers of tumors harboring each mutational signature. Only samples with counts more than zero are shown. (c) Interaction of signatures with each other. Also see Additional file 3: Table S9 for P values.

**Fig. S16: Mutational signature analysis of ovarian cell lines' exomes by NMF-based signature extraction.** (a) Mutational signatures of ovarian cell lines. The heatmap is divided based on dominant signature status. The First and second dominant signatures are annotated on the top of each heatmap. The contribution values of each signature are shown by a color scale. Color codes representing each dominant mutational signature are shown. (b) TMB of SBS, ID and DBS signatures. TMB is measured in somatic mutations per Megabase (Mb). In the TMB plots, columns represent the detected mutational signatures and are ordered by mean somatic mutations per Mb from the lowest frequency, left, to the highest frequency, right. Numbers at the bottom of the TMB plots represent the numbers of tumors harboring each mutational signature. Only samples with counts more than zero are shown. (c) Interaction of signatures with each other. Also see Additional file 3: Table S9 for P values.

**Fig. S17: Mutational signature analysis of cervical cell lines' exomes by NMF-based signature extraction.** (a) Mutational signatures of cervical cell lines. The heatmap is divided based on dominant signature status. The First and second dominant signatures are annotated on the top of each heatmap. The contribution values of each signature are shown by a color scale. Color codes representing each dominant mutational signature are shown. (b) TMB of SBS, ID and DBS signatures. TMB is measured in somatic mutations per Megabase (Mb). In the TMB plots, columns represent the detected mutational signatures and are ordered by mean somatic mutations per Mb from the lowest frequency, left, to the highest frequency, right. Numbers at the bottom of the TMB plots represent the numbers of tumors harboring each mutational signature. Only samples with counts more than zero are shown. (c) Interaction of signatures with each other. Also see Additional file 3: Table S9 for P values.

**Fig. S1****1<sup>st</sup> dominant signature****2<sup>nd</sup> dominant signature****a**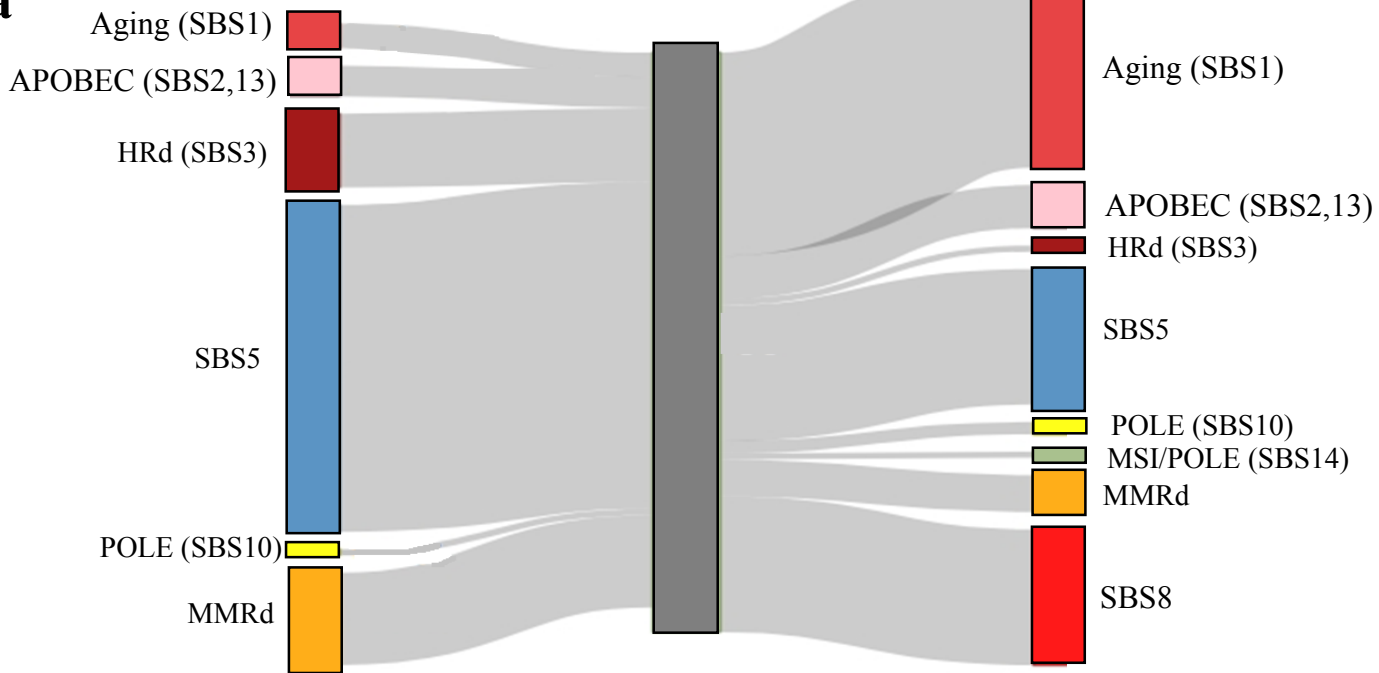**b**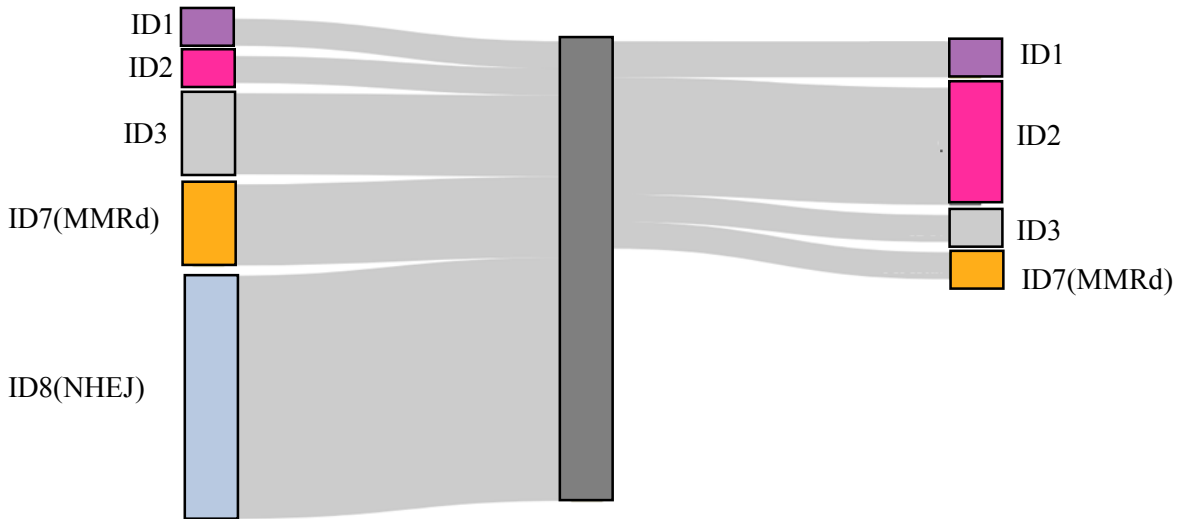**c**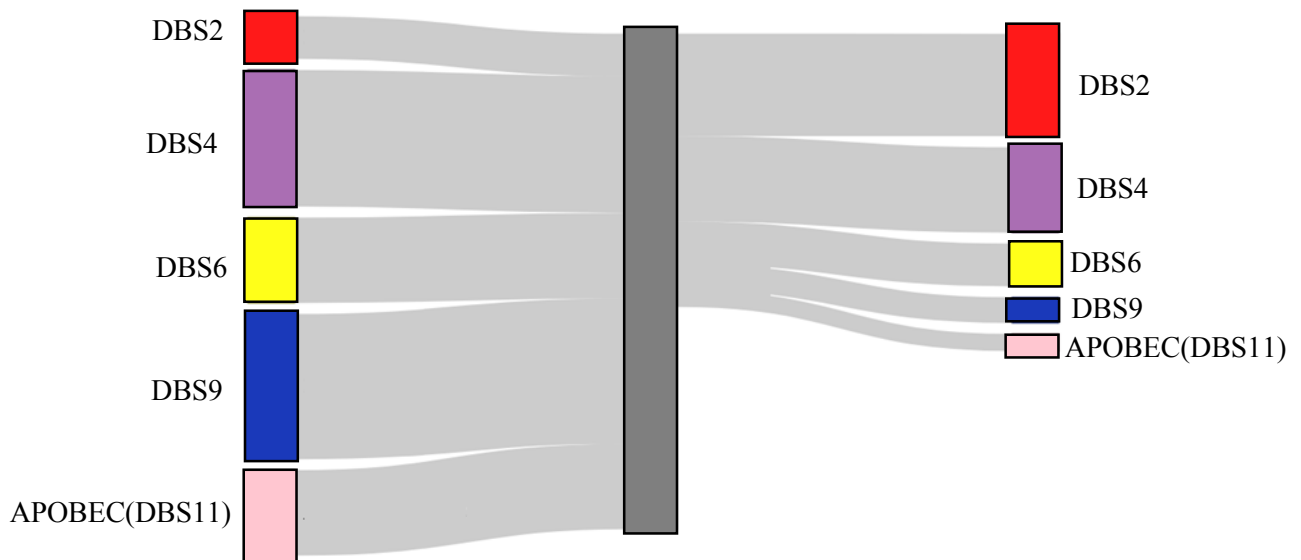

**Fig. S2****1<sup>st</sup> dominant signature****2<sup>nd</sup> dominant signature****a**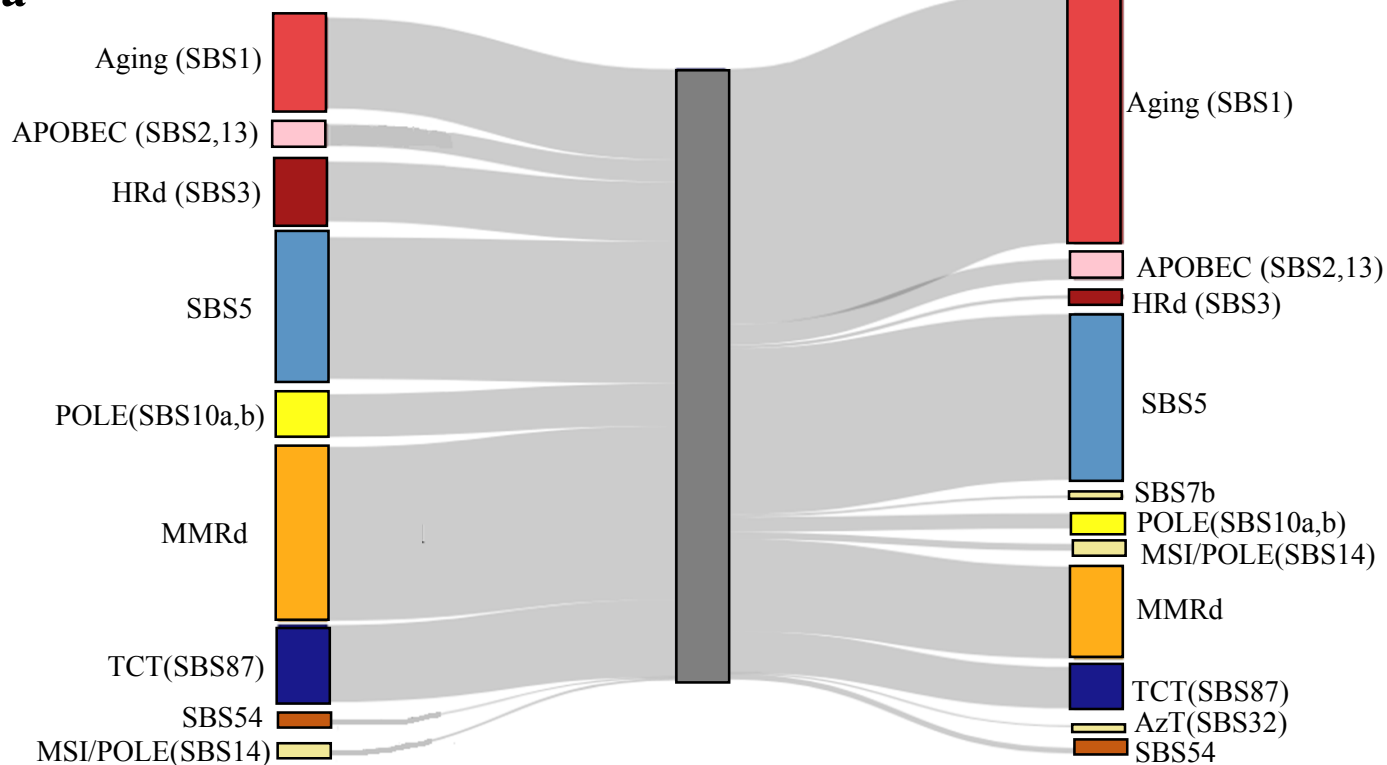**b**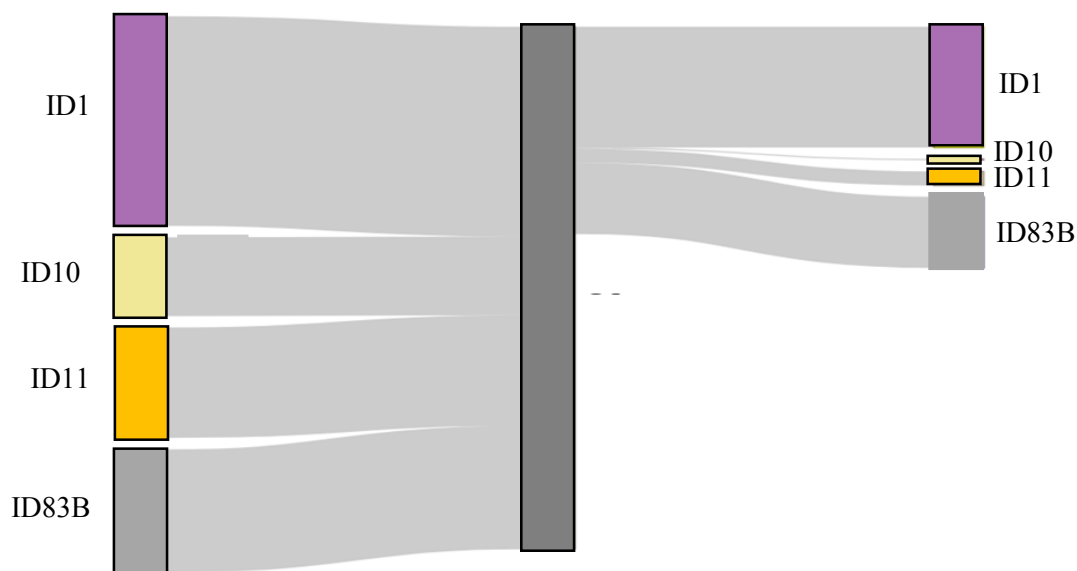**c**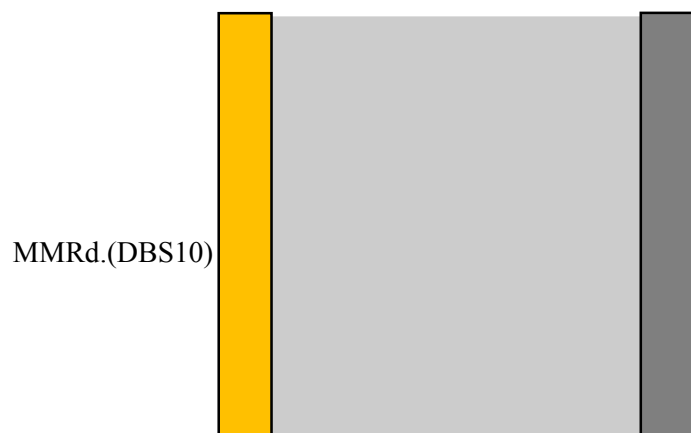



**Fig. S3**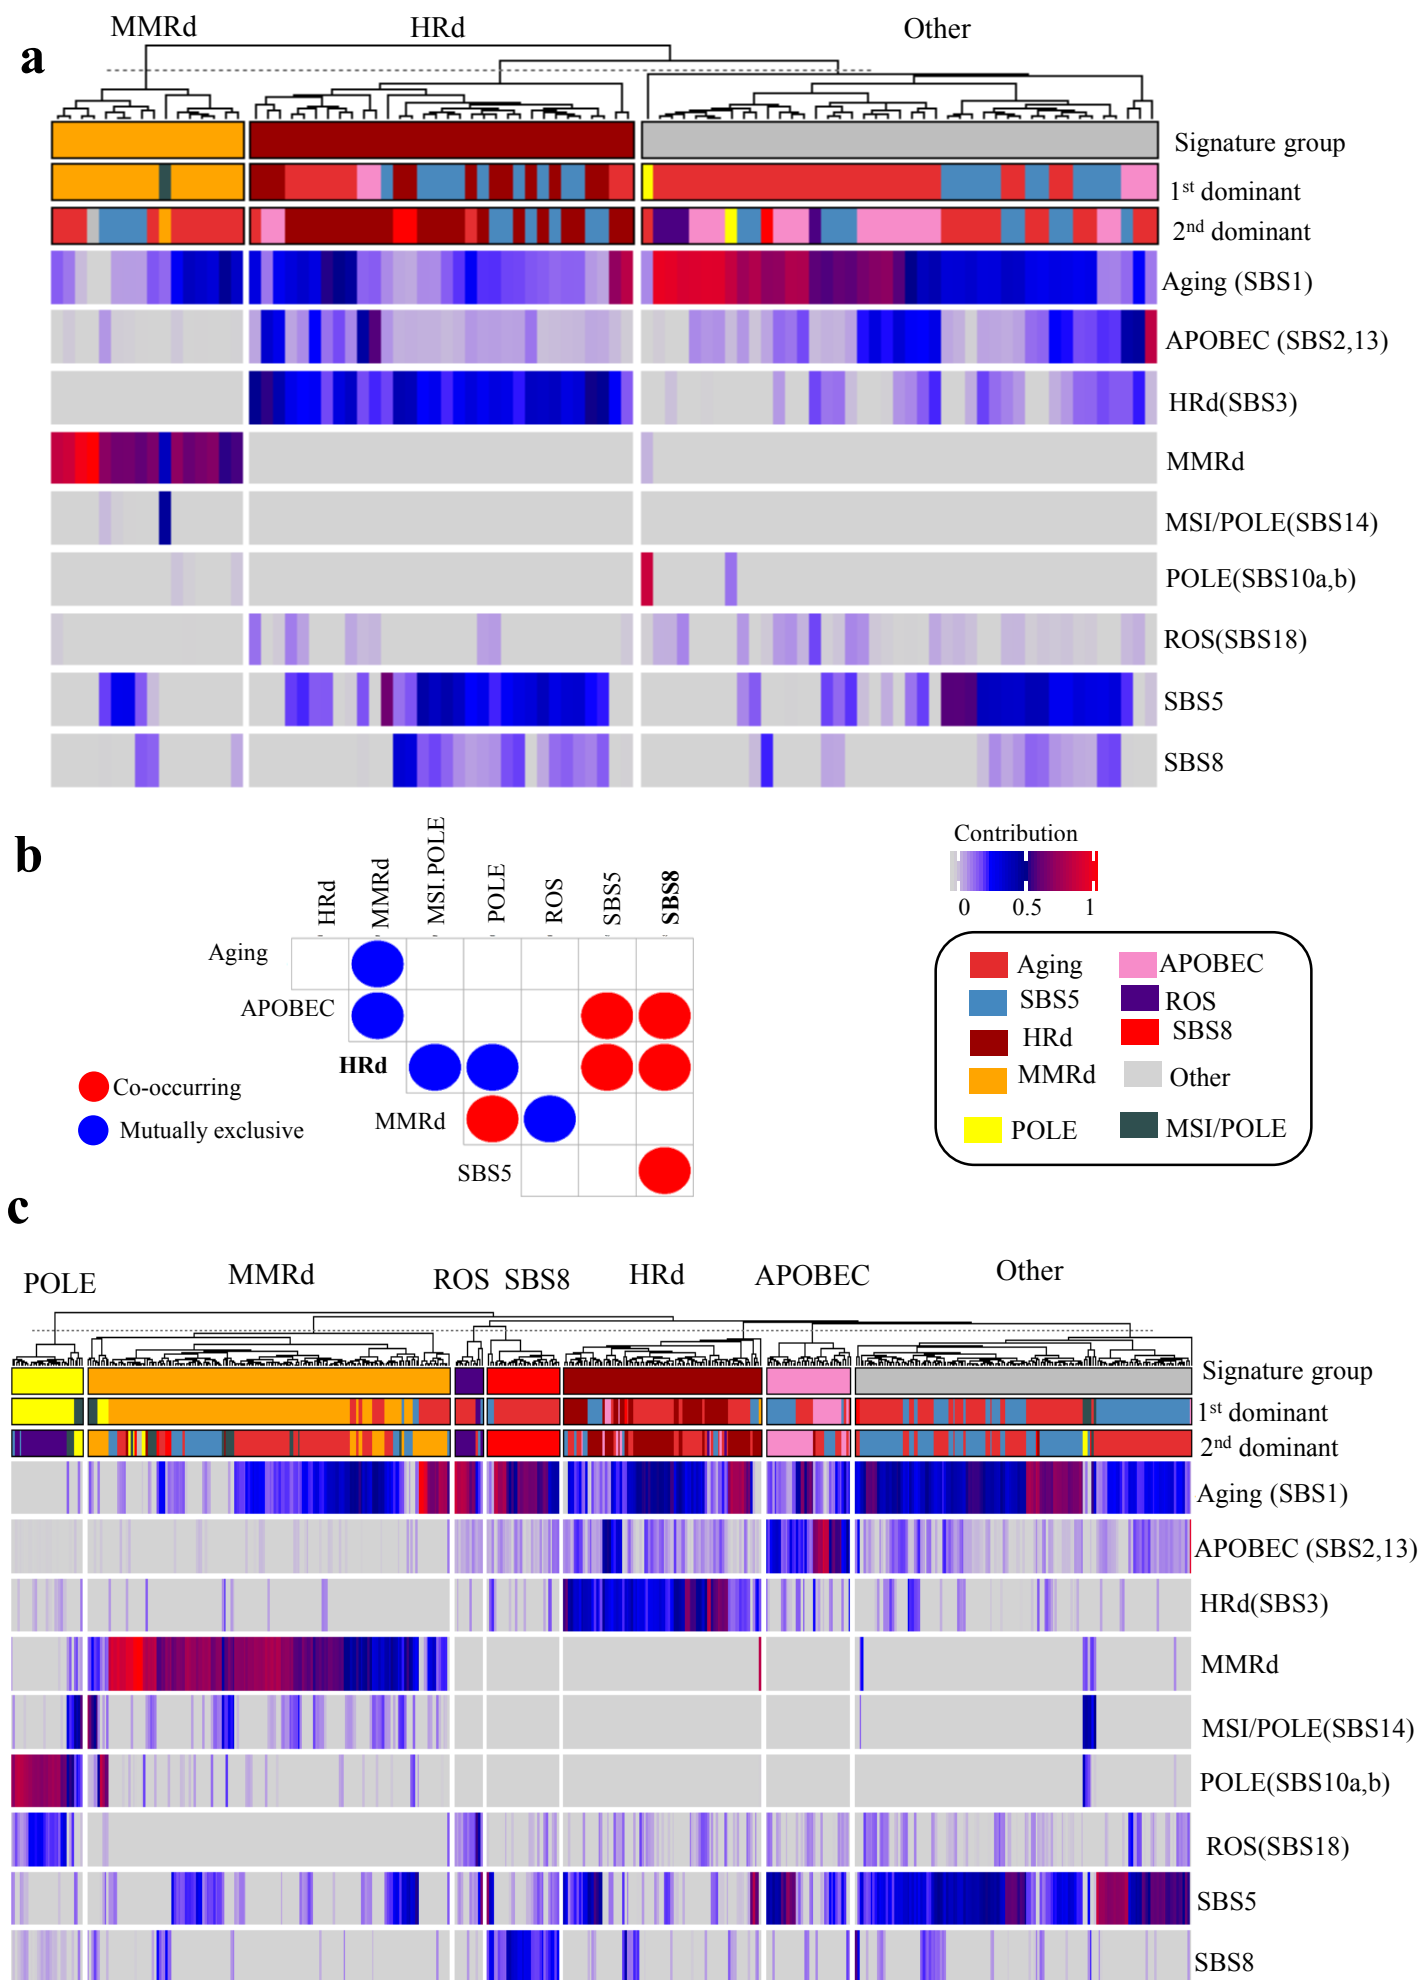

**Fig. S4**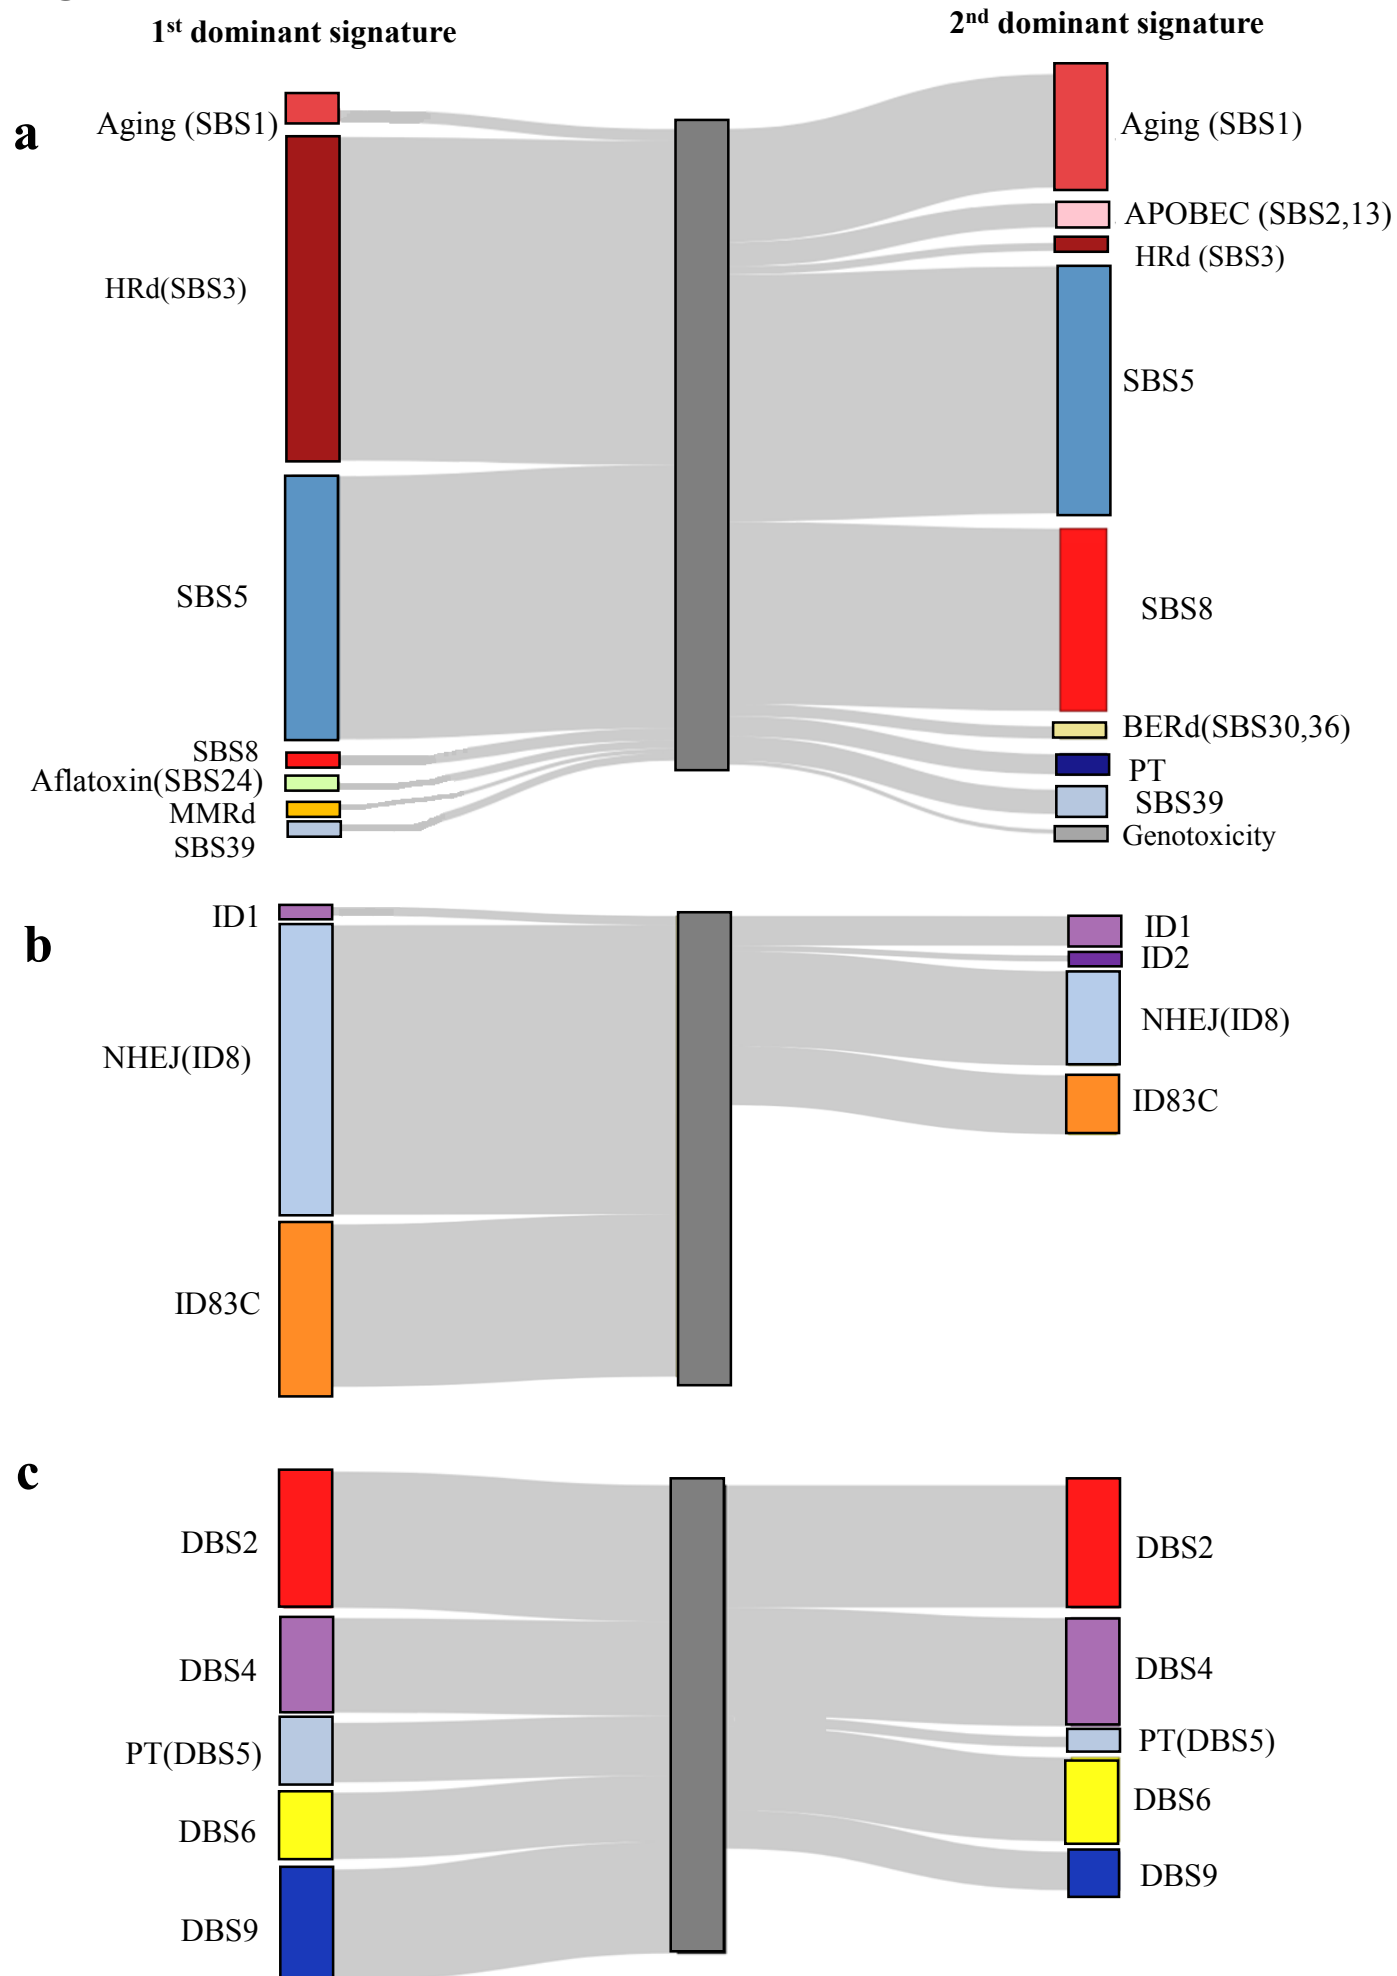

**Fig. S5**

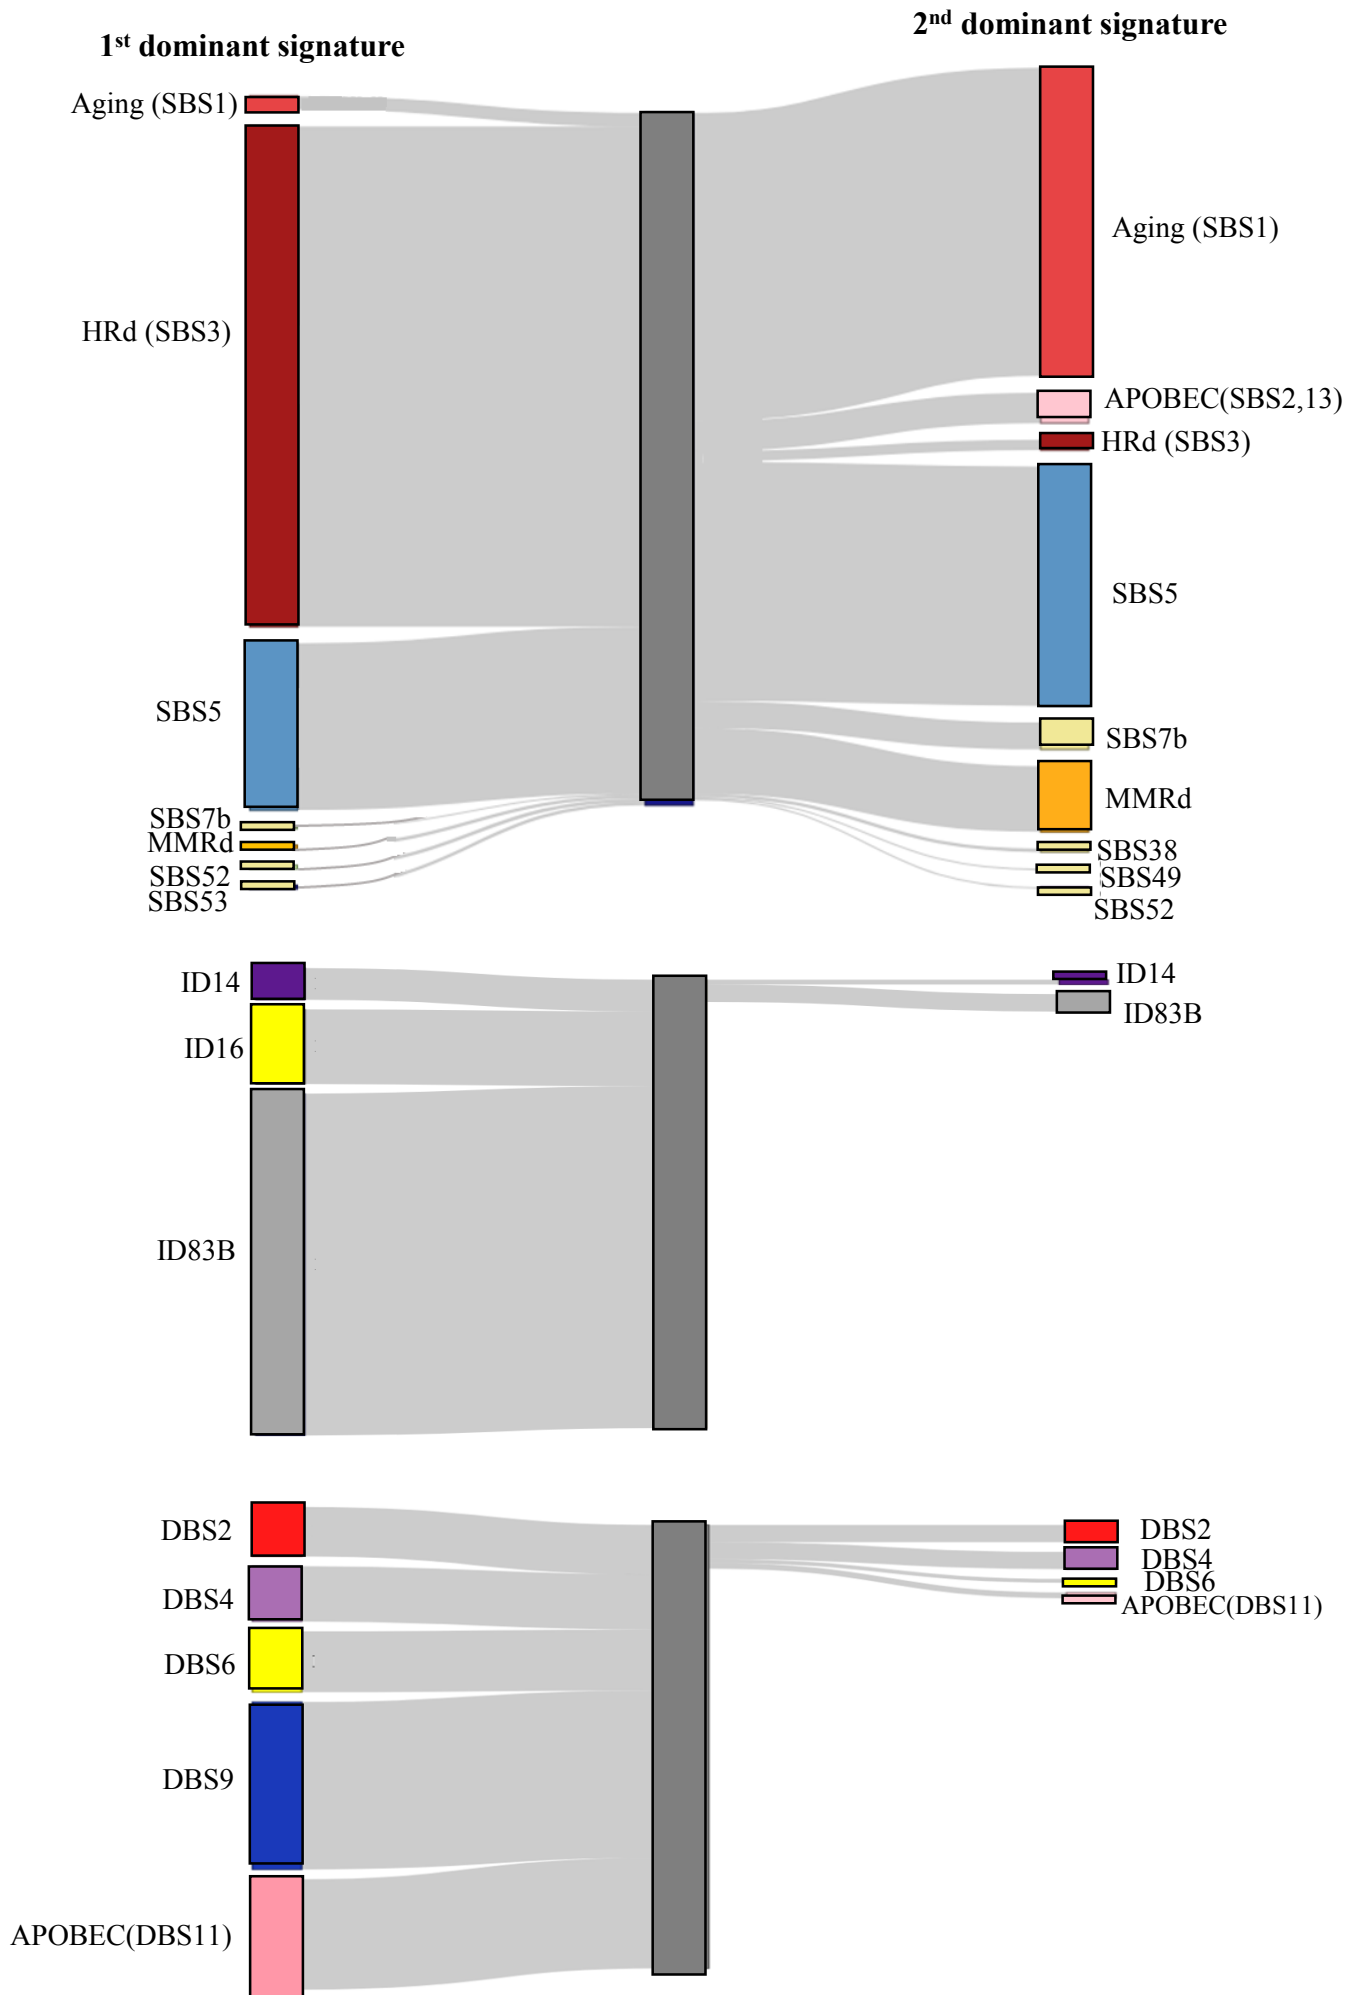

**Fig. S6**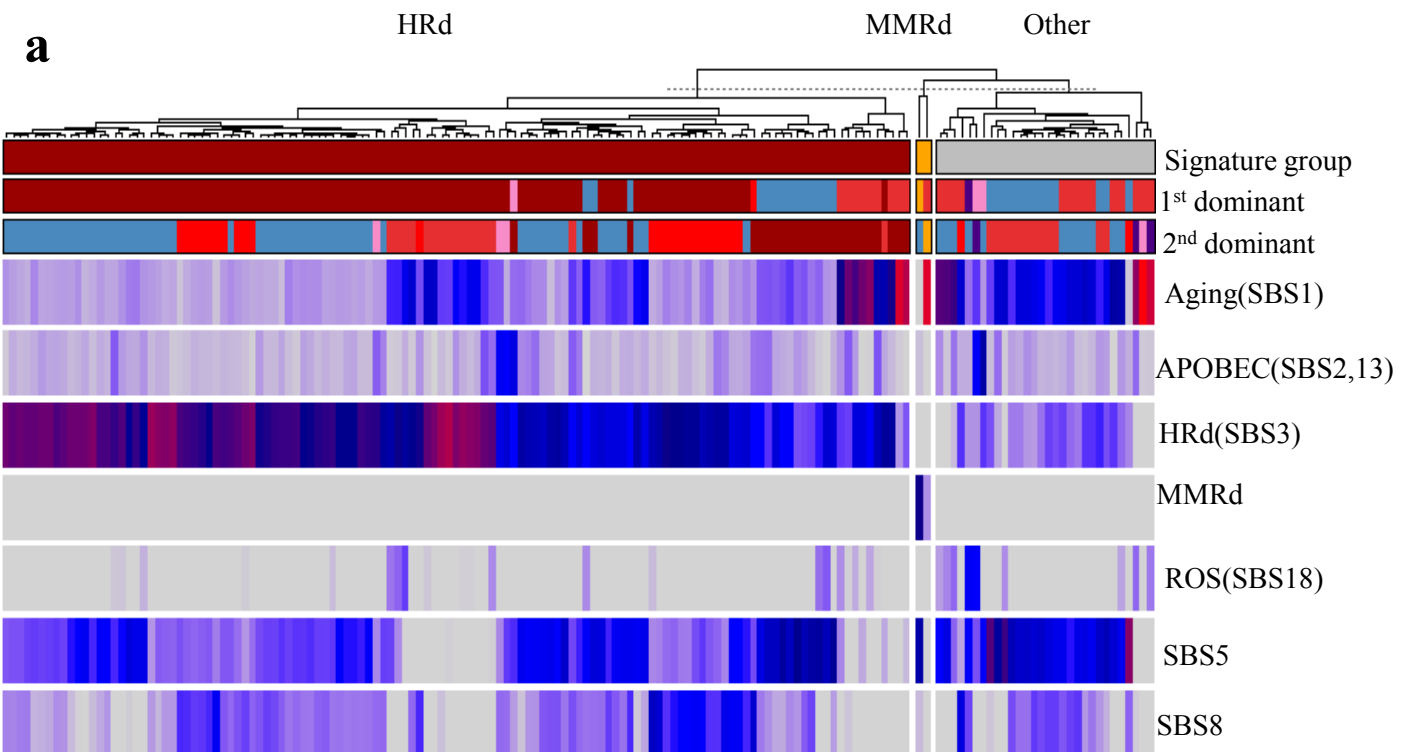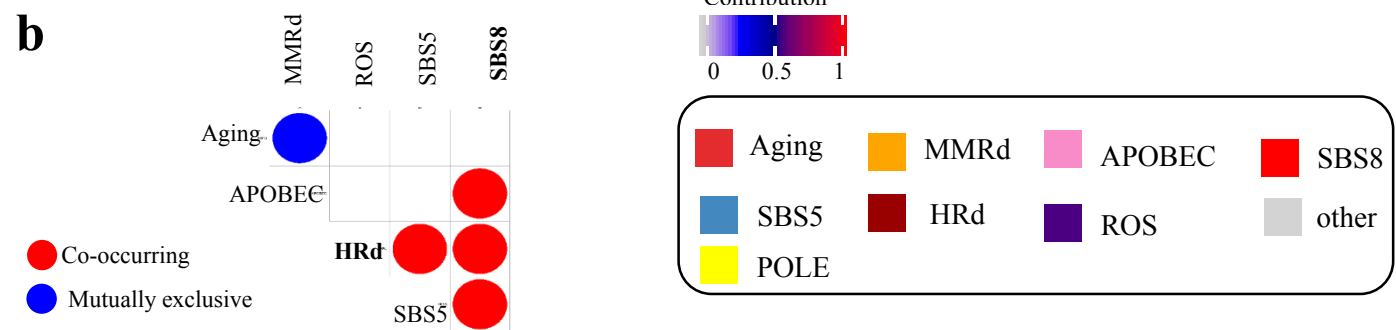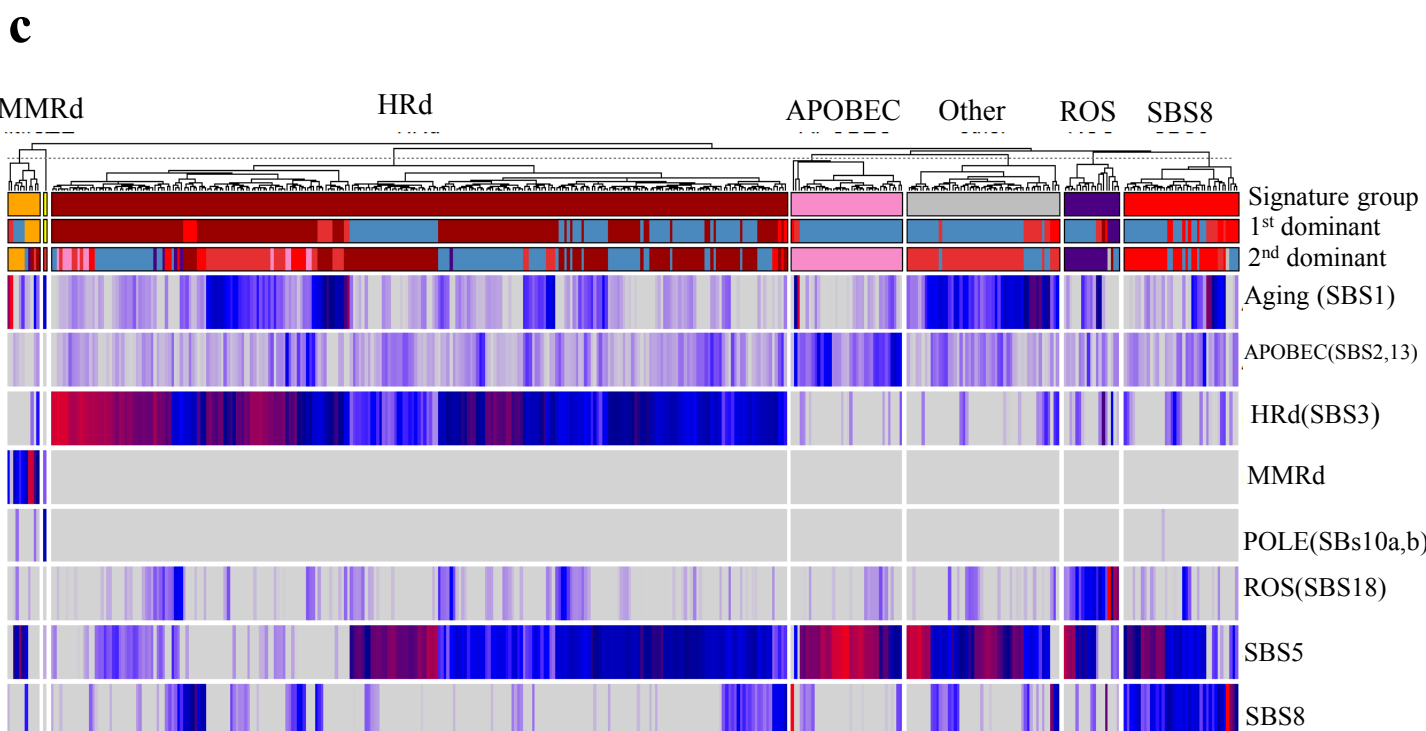

**Fig. S7****a**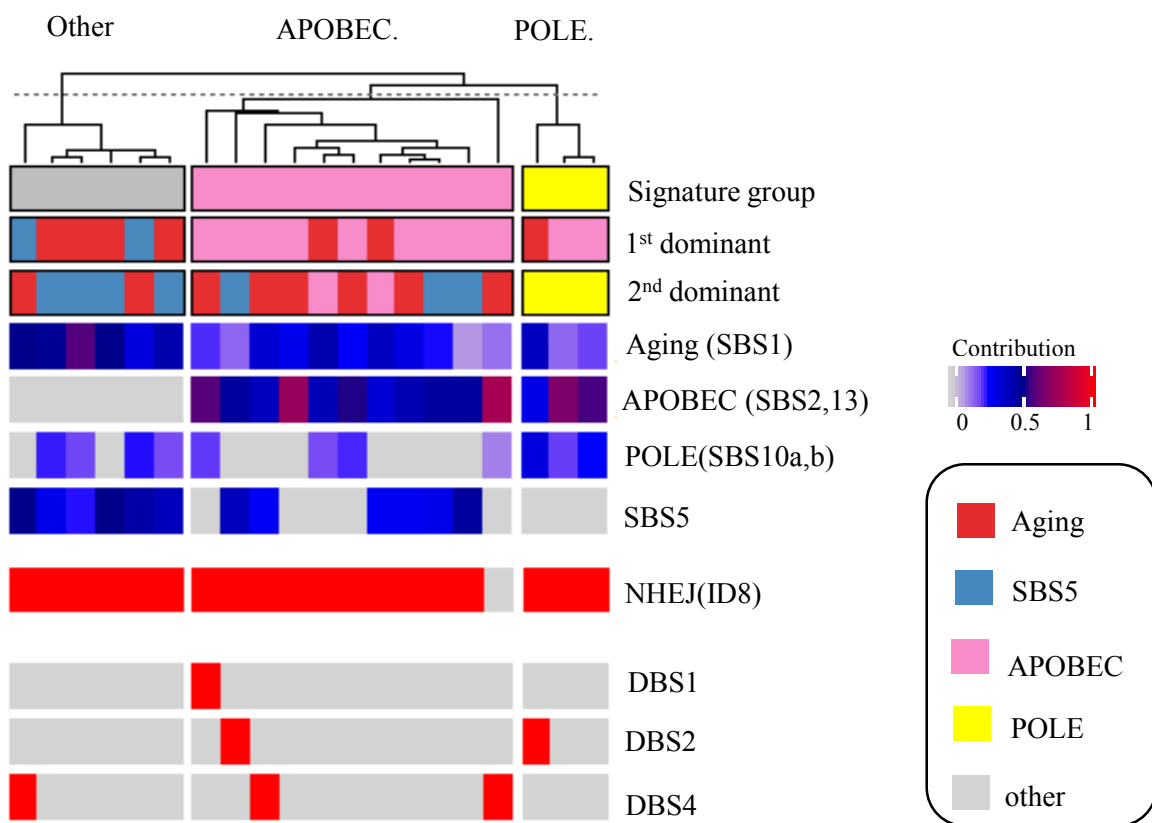**b**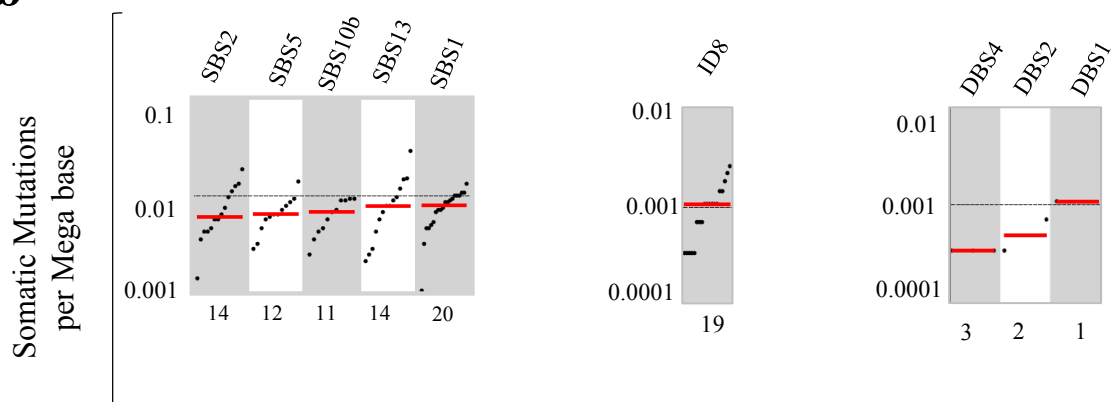

**Fig. S8**

**1<sup>st</sup> dominant signature**

**2<sup>nd</sup> dominant signature**

**a**

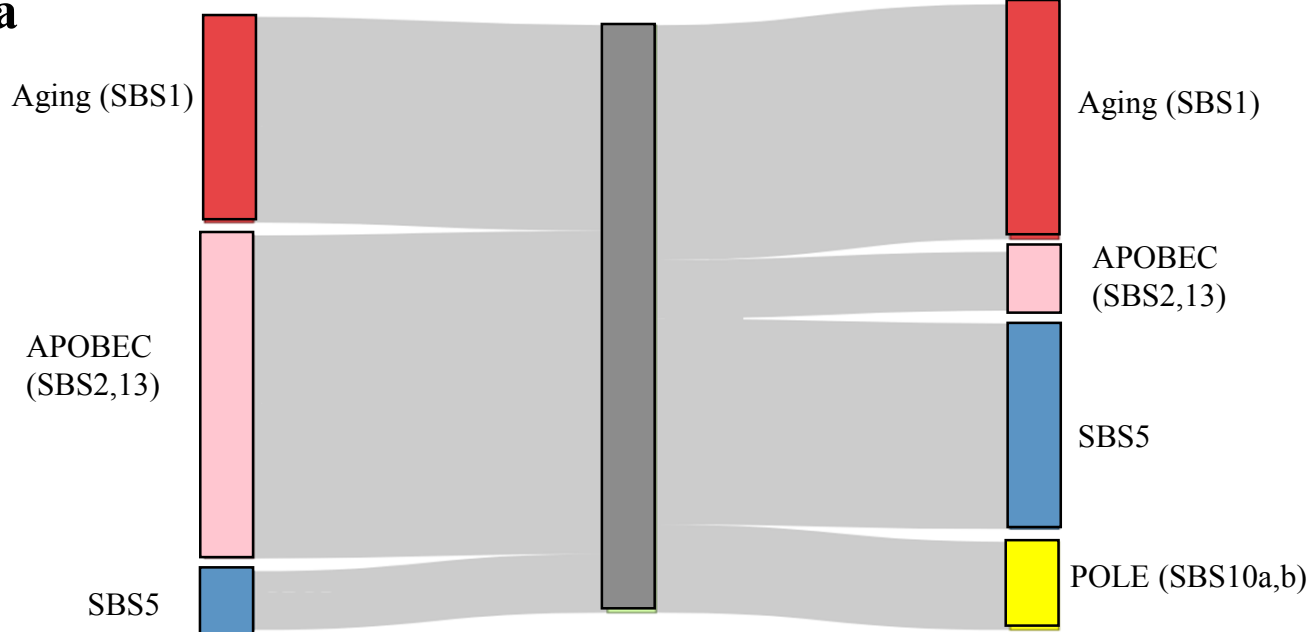

**b**

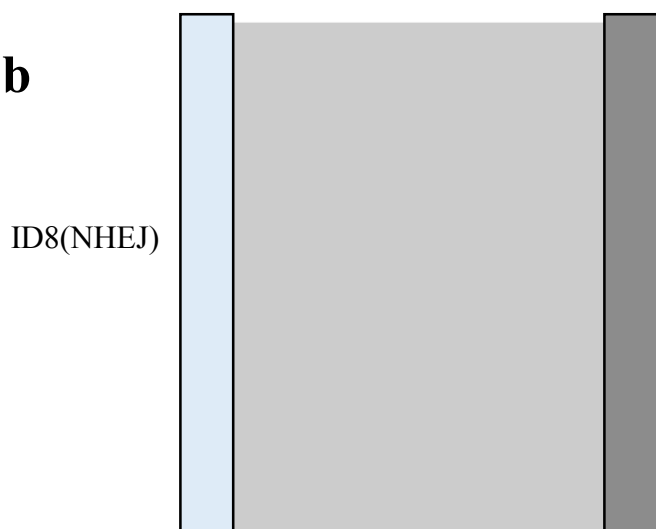

**c**

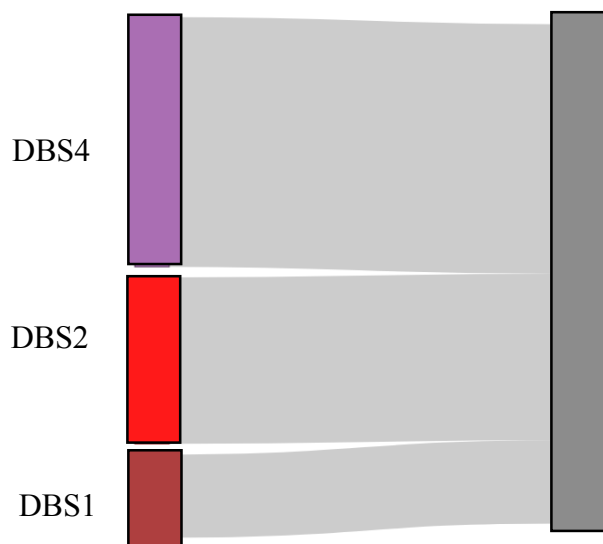

**Fig. S9**

**1<sup>st</sup> dominant signature**

**2<sup>nd</sup> dominant signature**

**a**

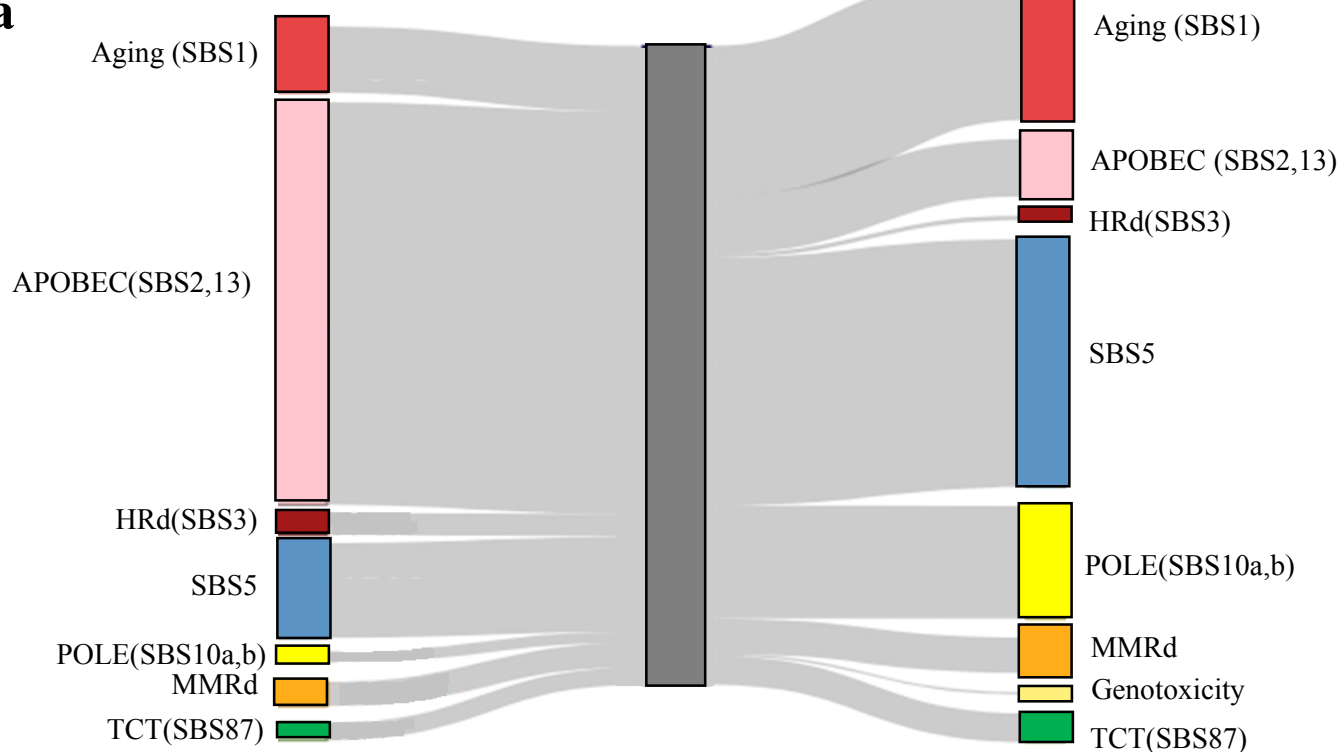

**b**

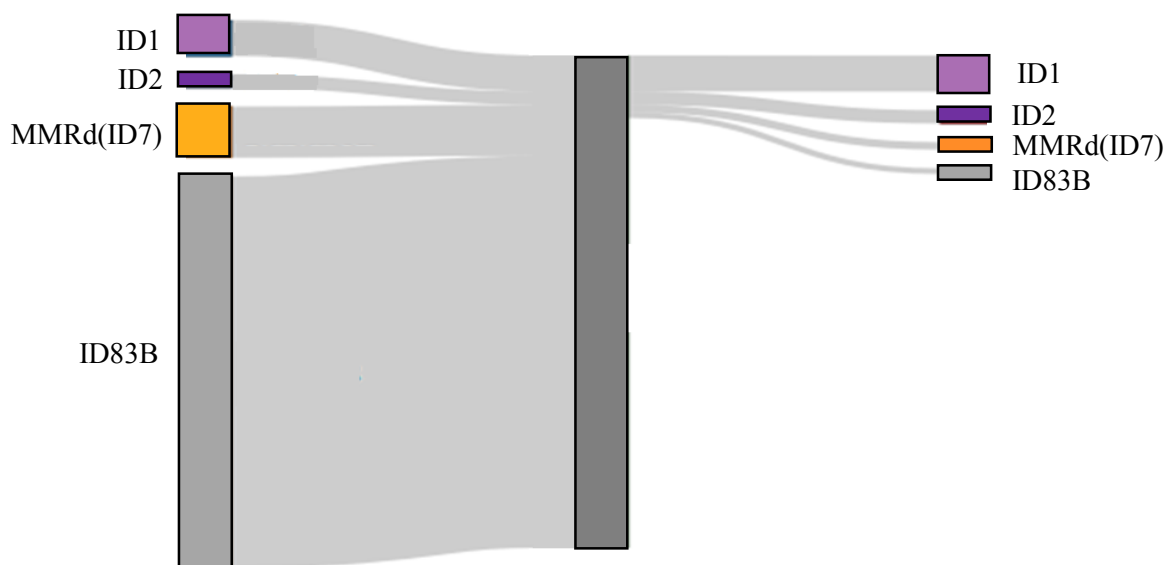

**c**

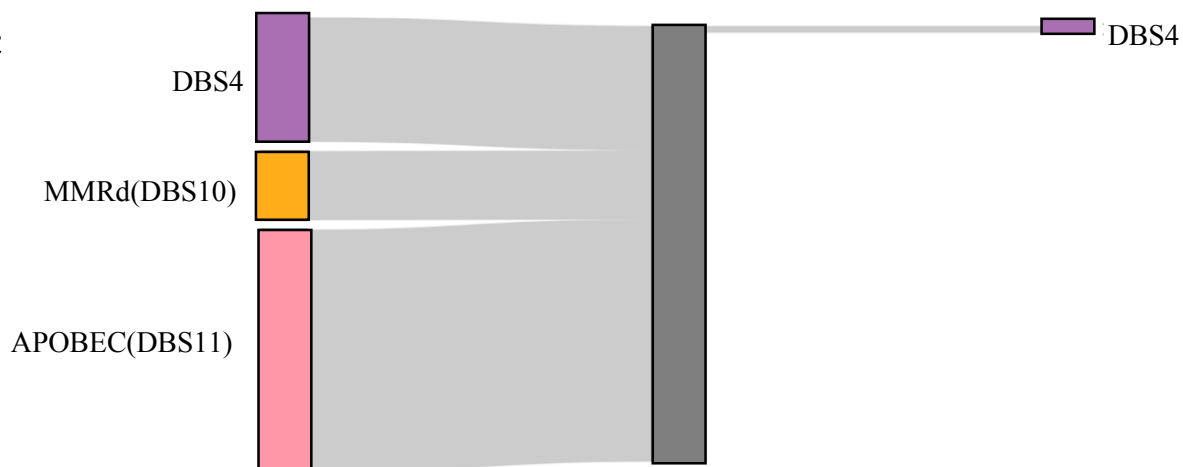

**Fig. S10**

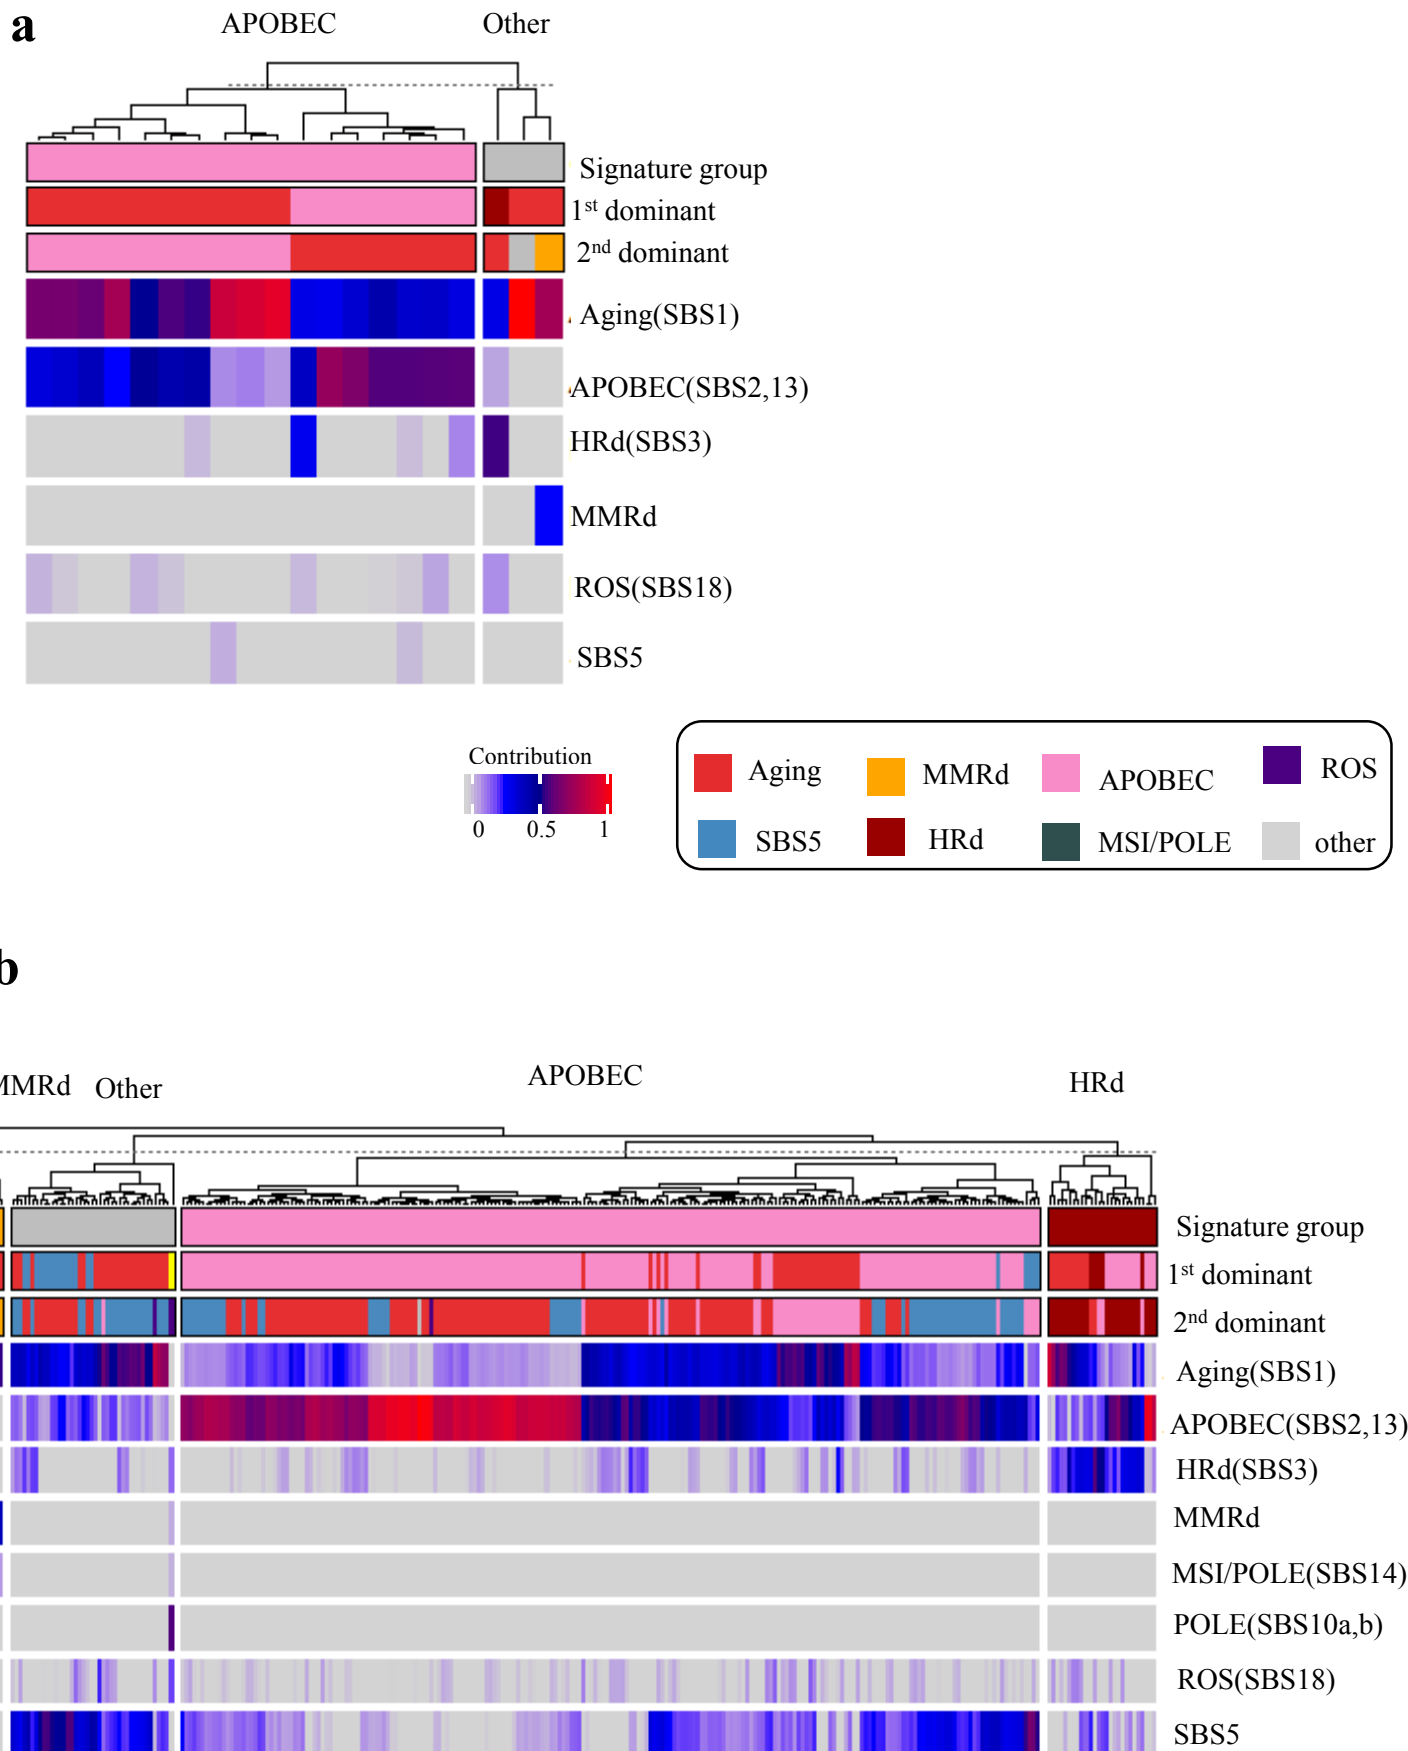



**Fig. S11**

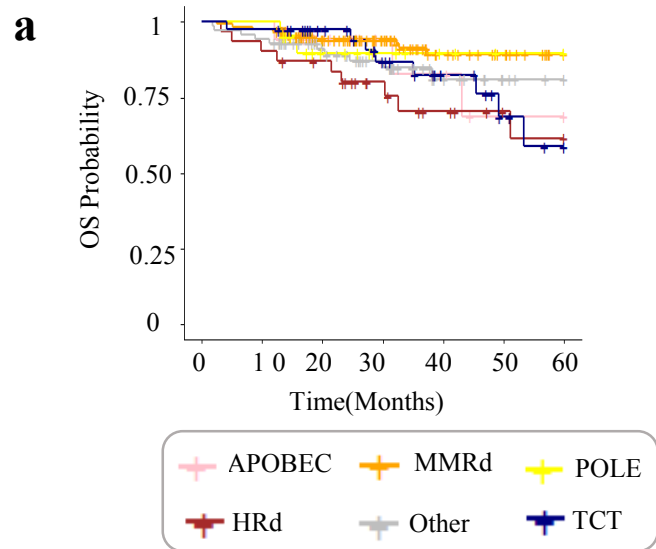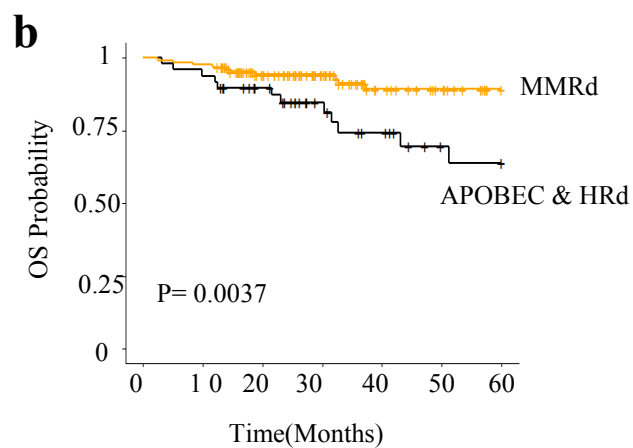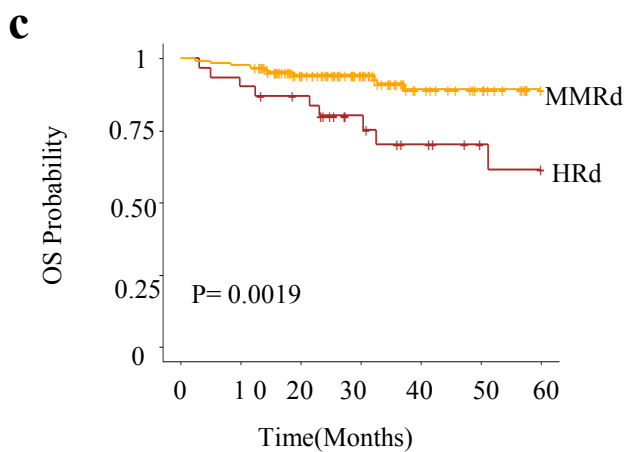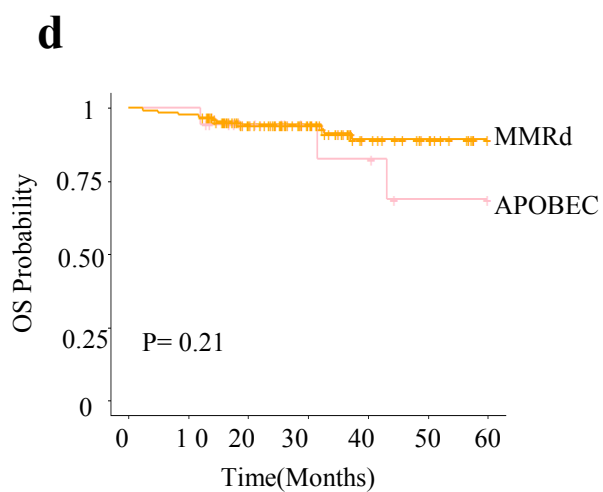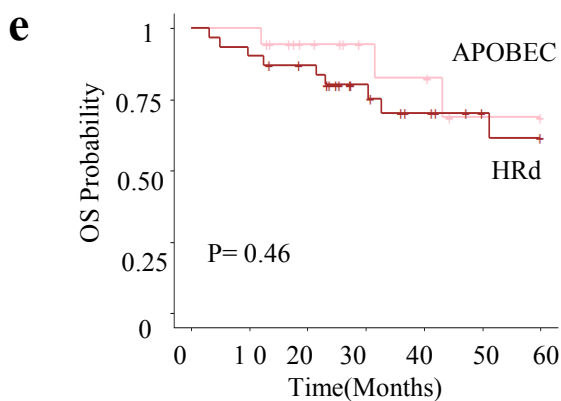

**Fig. S12**

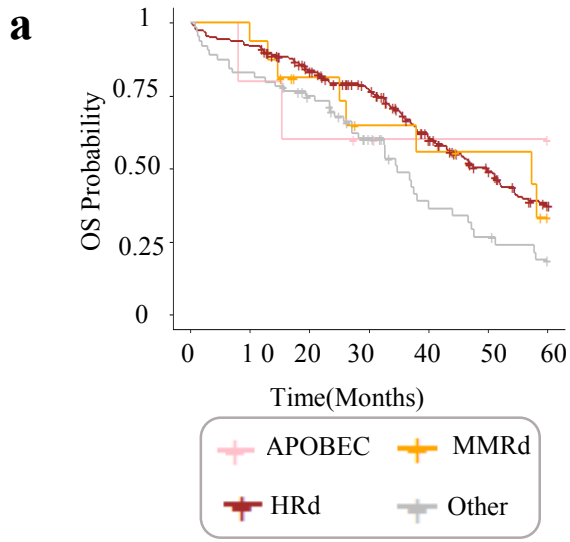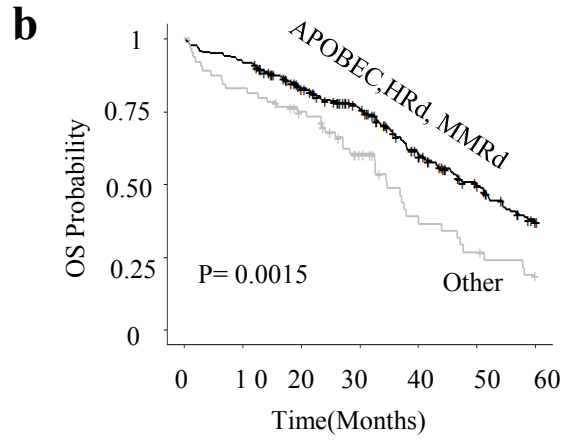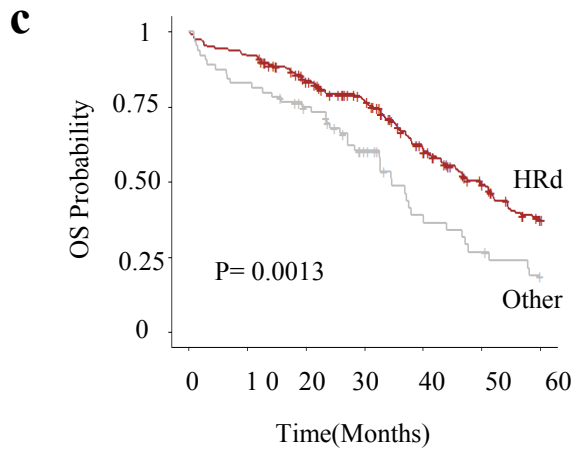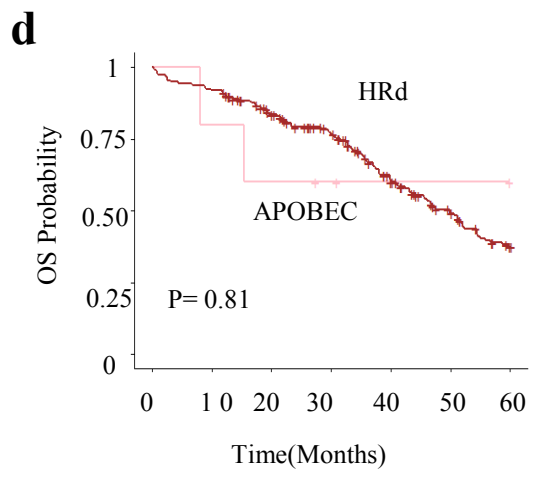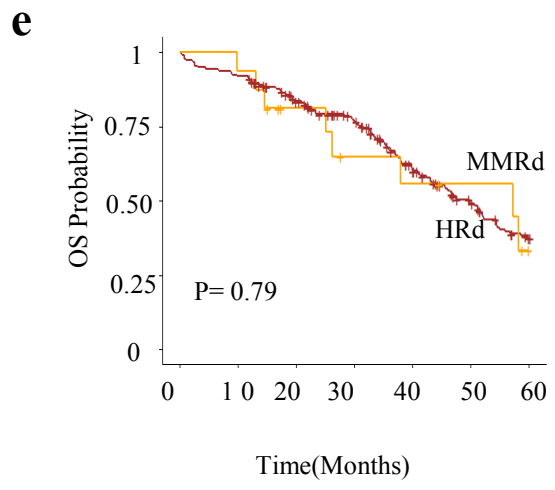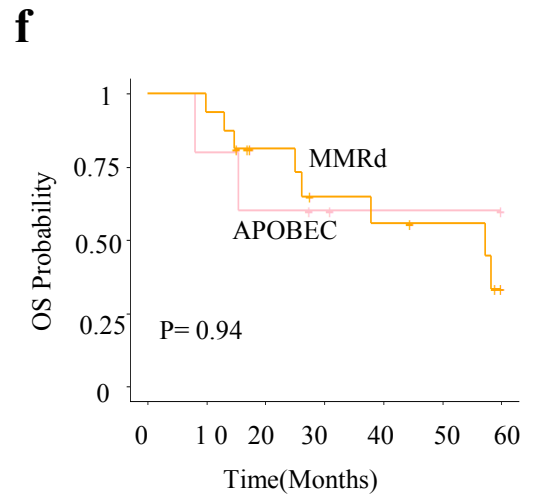

**Fig. S13**

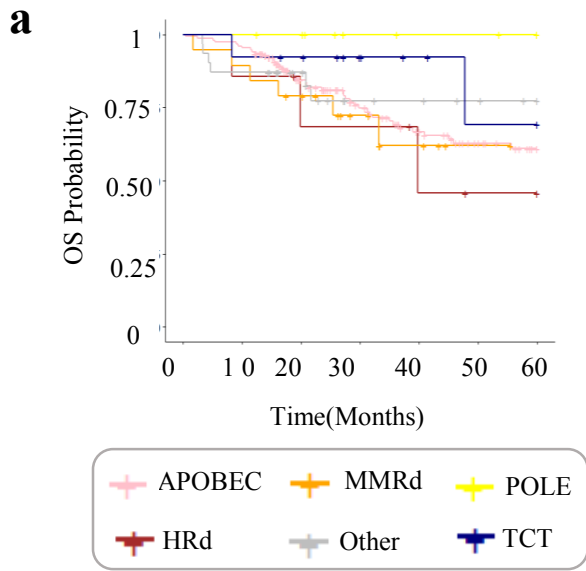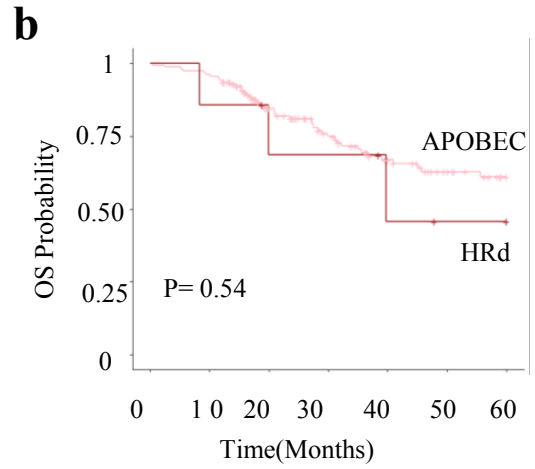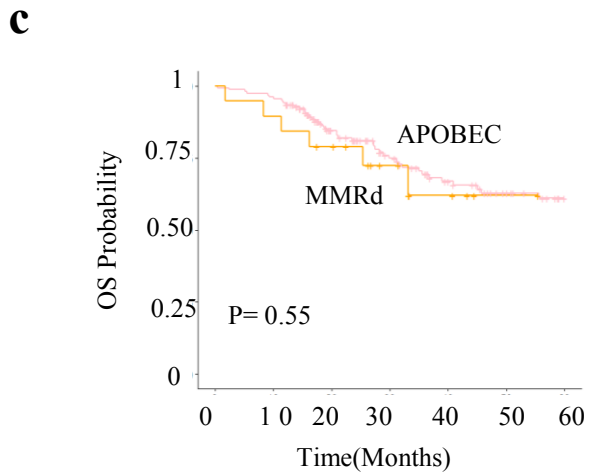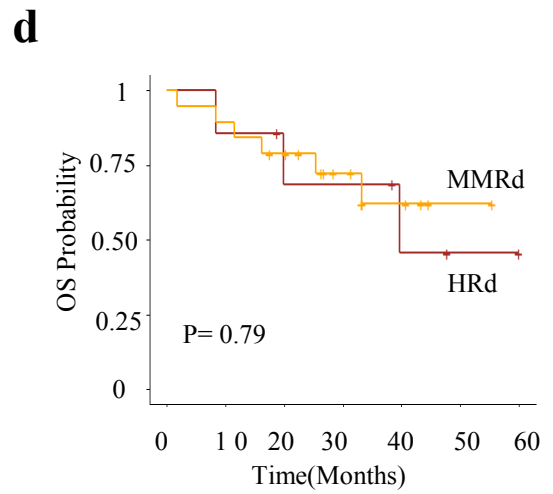

**Fig. S14**

**a**

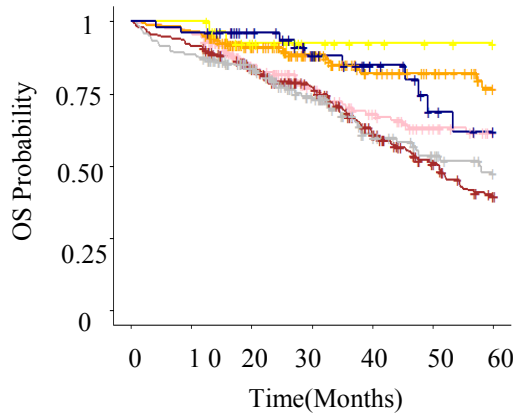

**b**

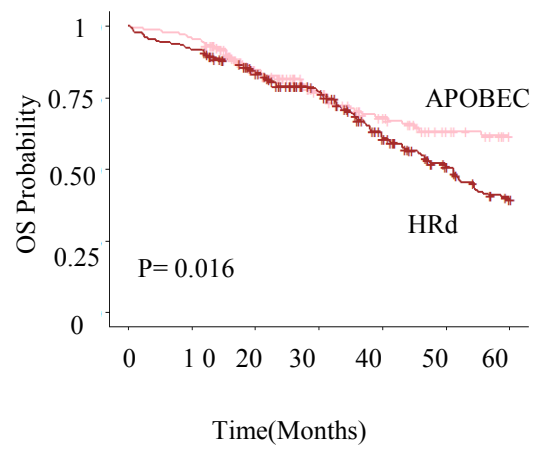

**c**

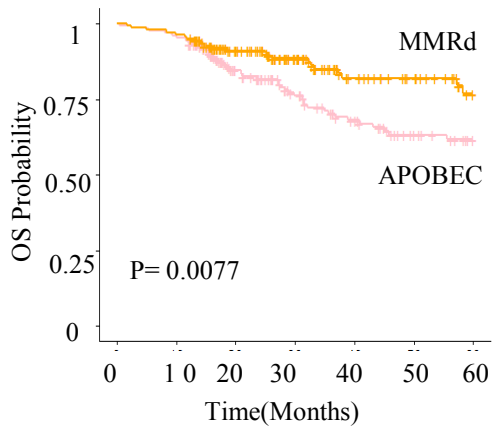

**d**

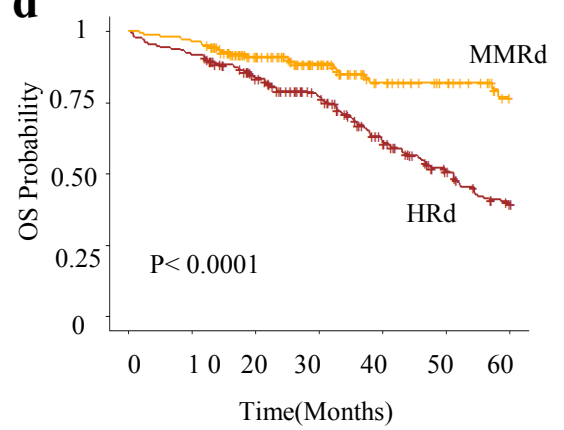

**Fig. S15**

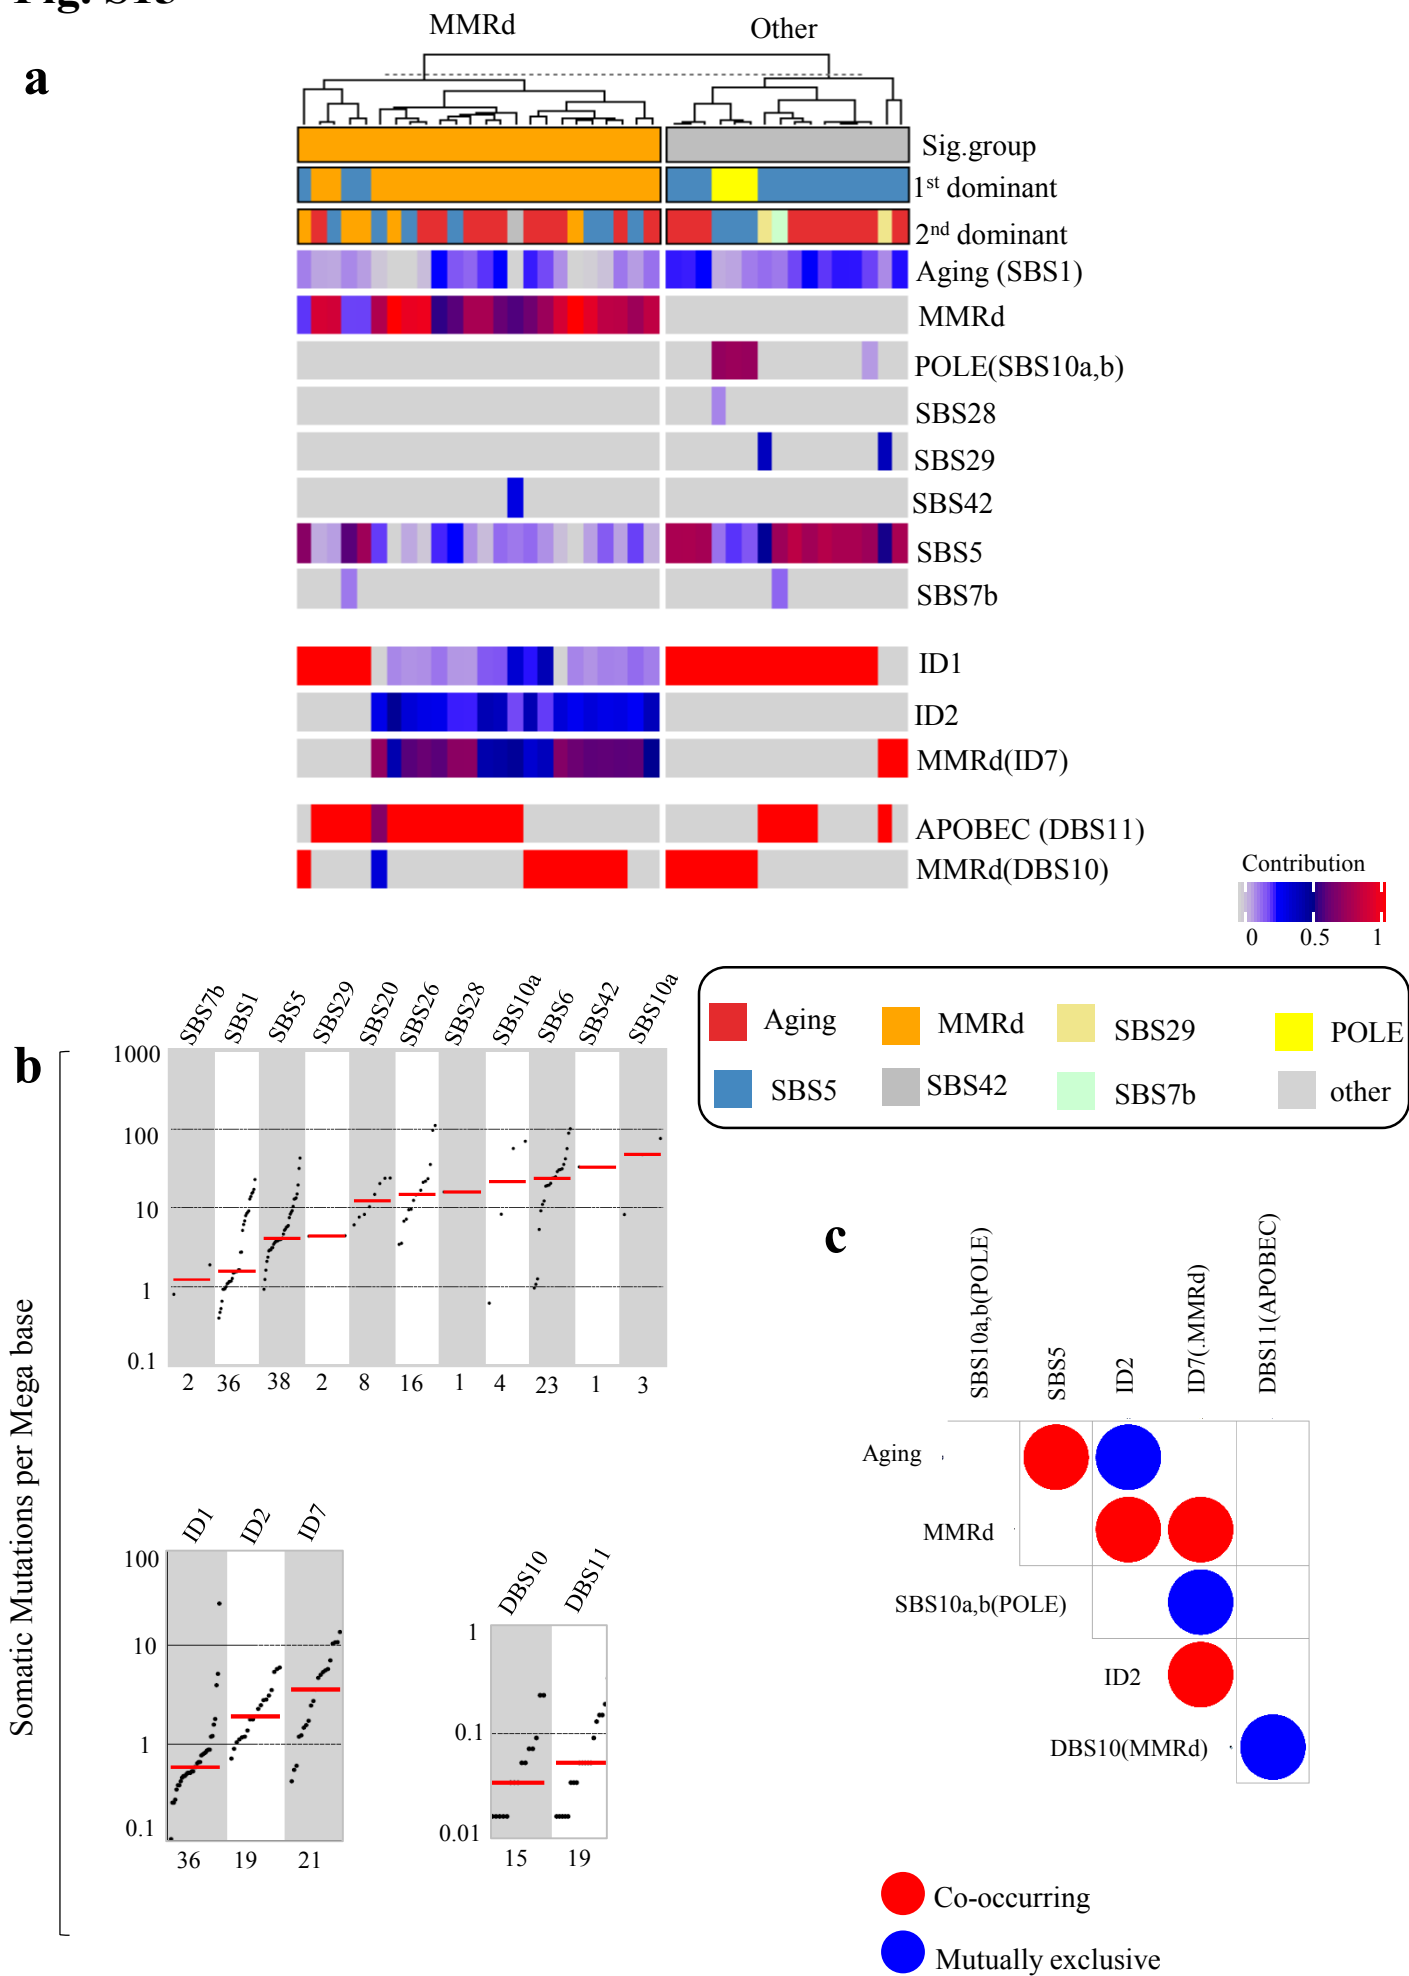

**Fig. S16**

**a**

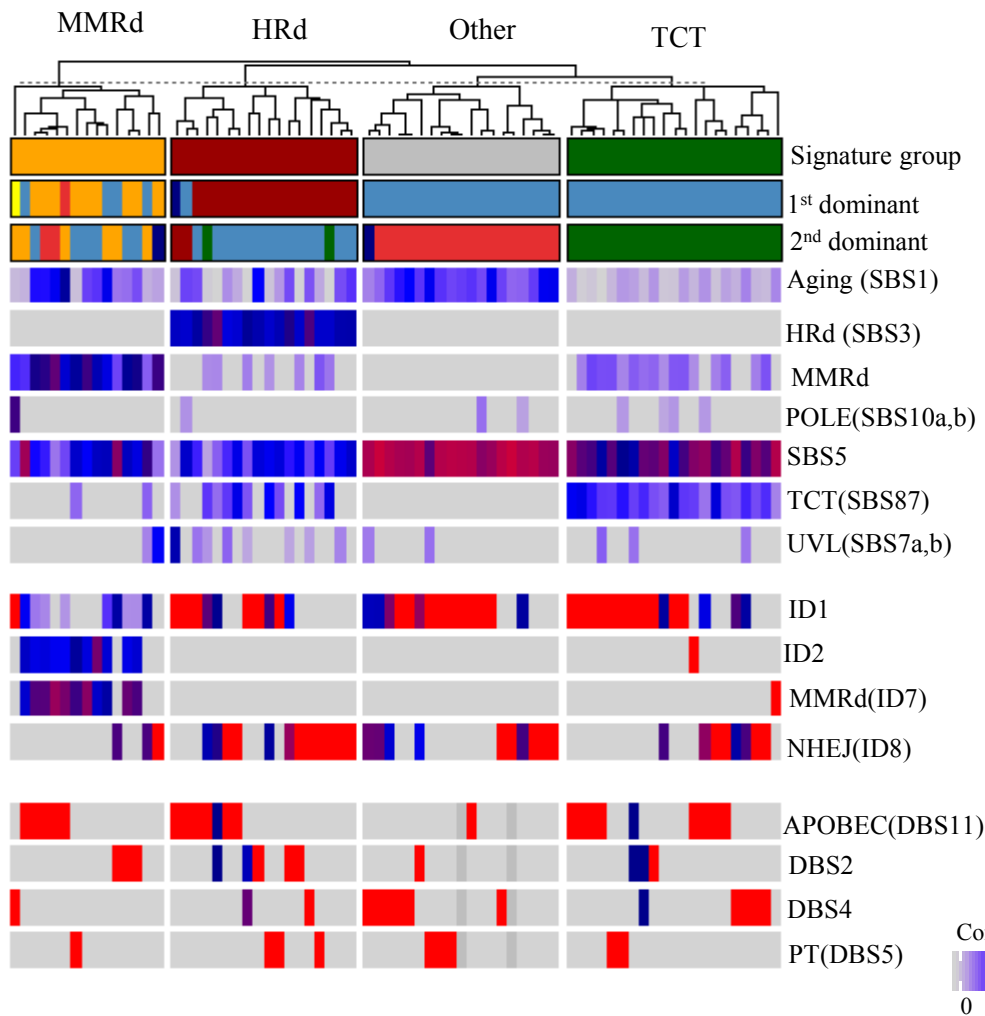

**b**

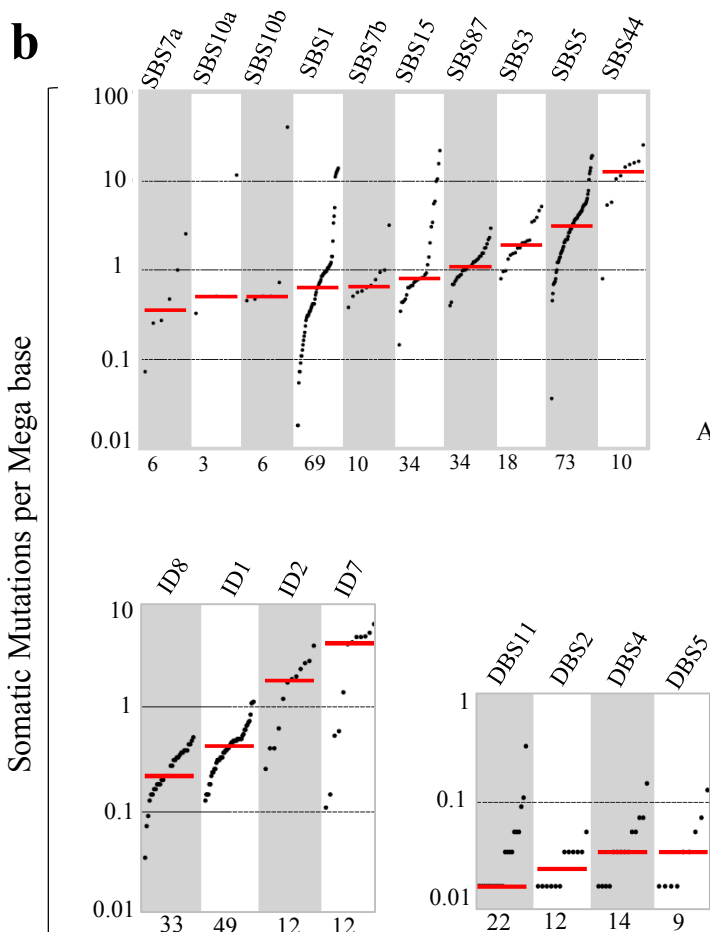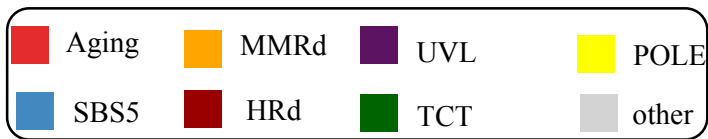

**c**

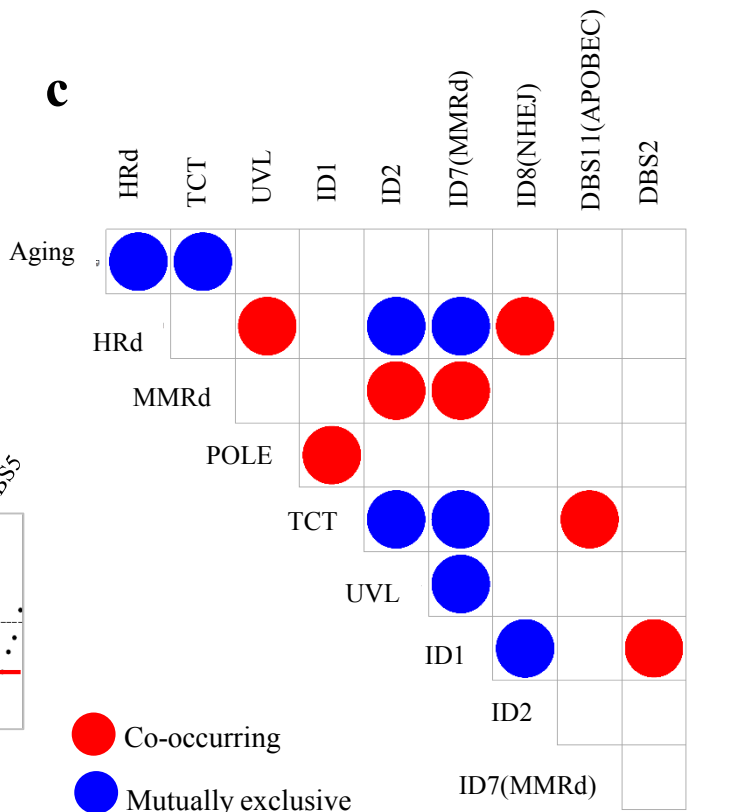

**Fig. S17**

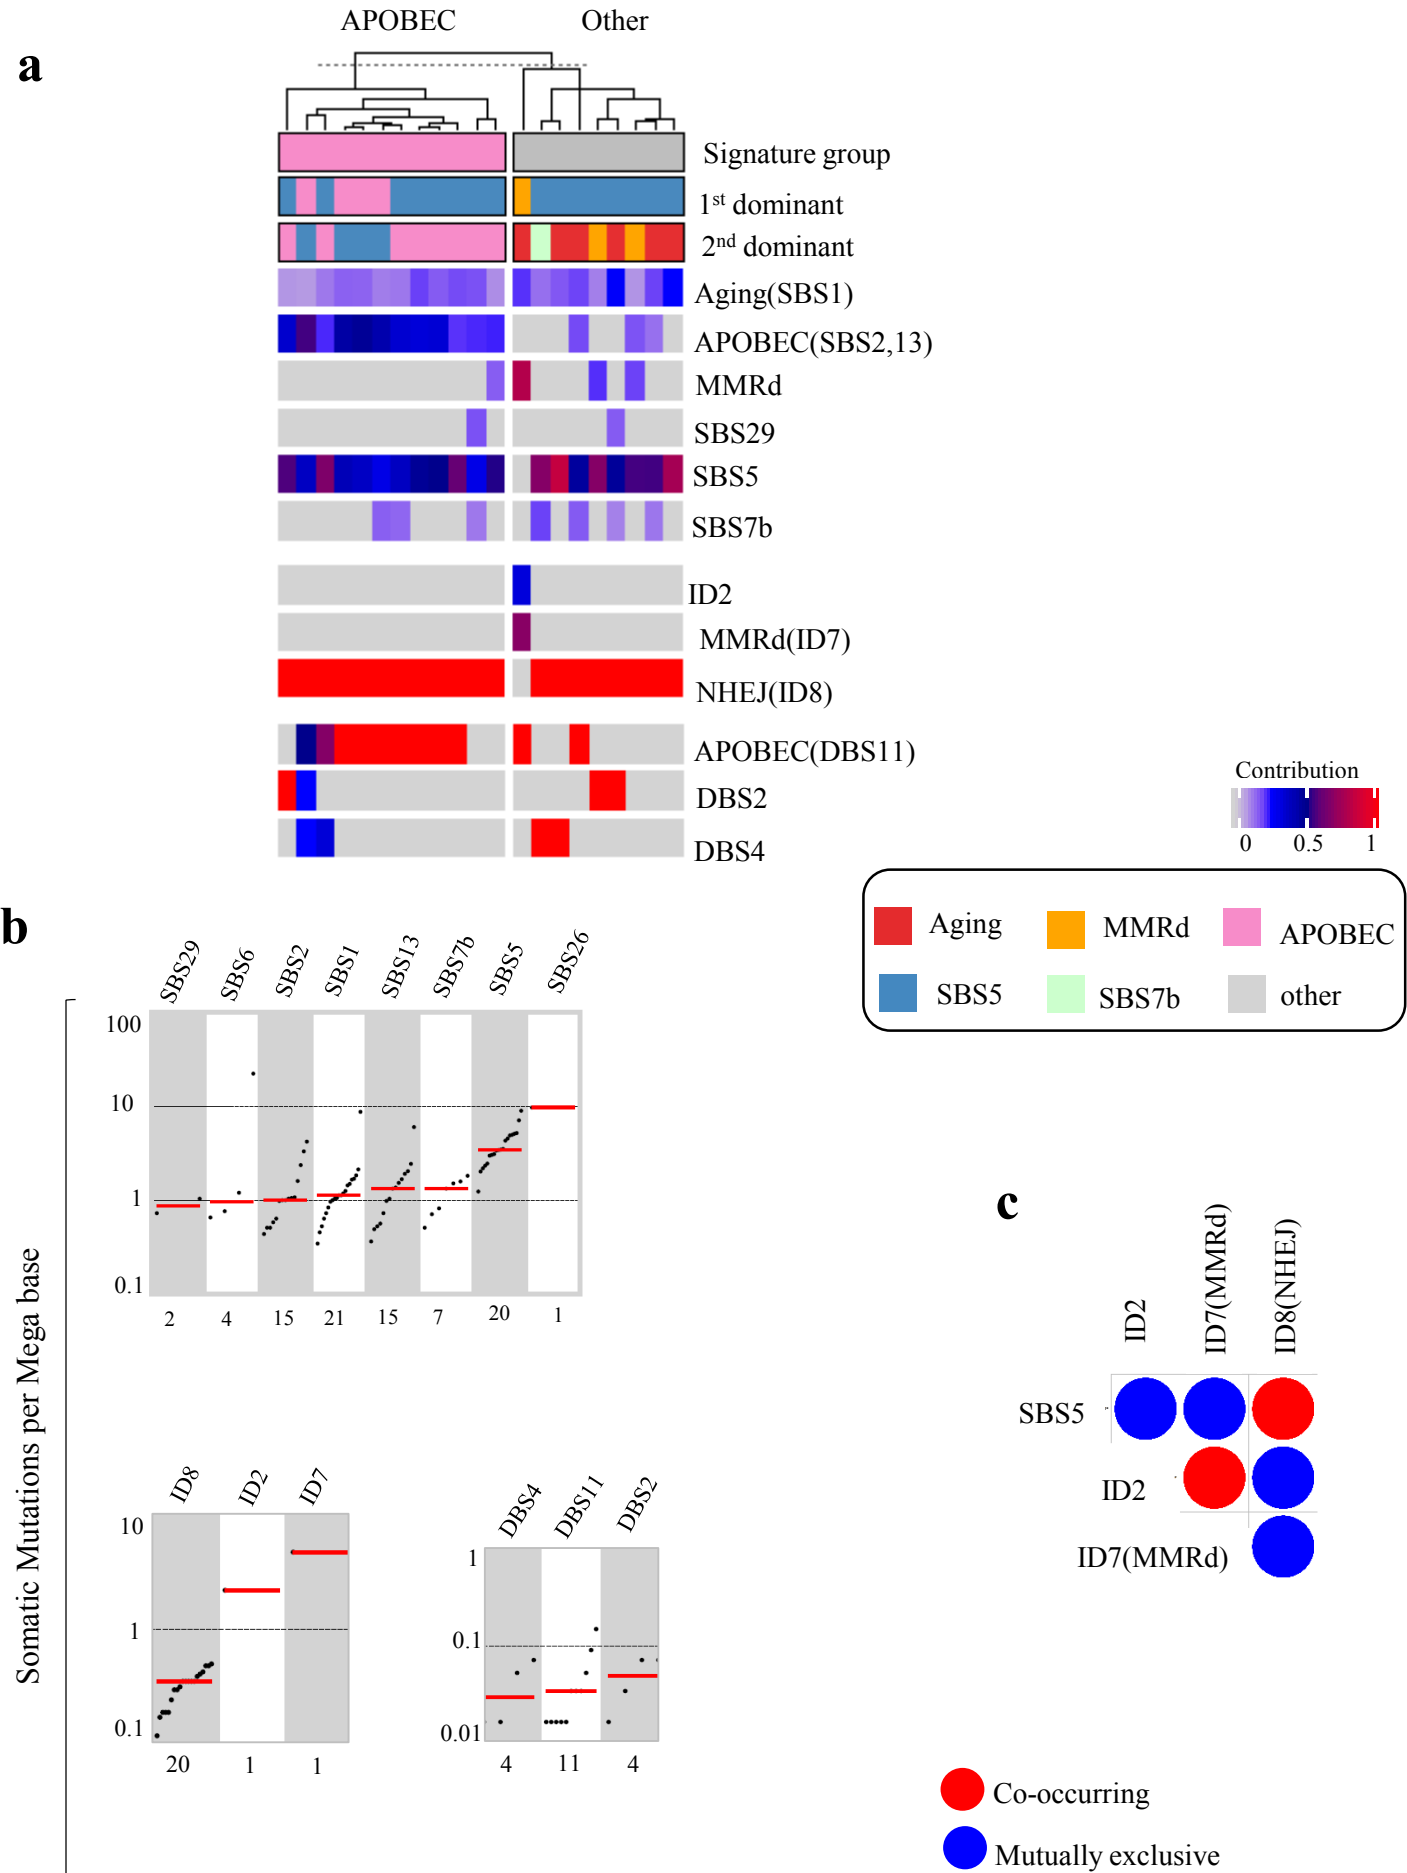

Supplement: MOESM1 [file 20093462]
