# Supplementary material for: Mutational signatures reveal ternary relationships between homologous recombination repair, APOBEC, and mismatch repair in gynecological cancers
Source: Springer Nature journal article supplement (doi:10.1186/s12967-022-03259-0), 2022-02-02
Supplement: MOESM3 [file 20093462]

**Table S2:** Interaction of mutational signatures with each other in UCEC WGS tumors analyzed by NMF-based approach. P value of co-occurrence and exclusivity of mutational signatures is measured by hypergeometric test. Also, see Figure1.

| Signature_pair1 | Signature_pair2 | P value_Exclusivity | P value_Coocurrence |
|-----------------|-----------------|---------------------|---------------------|
| APOBEC          | MMRd            | 0.02051             | 0.99531             |
| HRd             | MMRd            | 0.02016             | 1                   |
| SBS8            | MMRd            | 0.00026             | 1                   |
| SBS8            | POLE            | 0.04723             | 1                   |
| APOBEC          | ID1             | 0.03784             | 0.99326             |
| SBS8            | ID1             | 0.00725             | 1                   |
| MMRd            | ID1             | 0.99942             | 0.00417             |
| SBS8            | ID2             | 0.00328             | 1                   |
| MMRd            | ID2             | 1                   | 0                   |
| ID1             | ID2             | 0.99998             | 0.00026             |
| SBS8            | ID3             | 0.0156              | 1                   |
| SBS8            | MMRd.ID         | 0.0156              | 1                   |
| MMRd            | MMRd.ID         | 1                   | 0                   |
| ID1             | MMRd.ID         | 0.99999             | 0.00023             |
| ID2             | MMRd.ID         | 1                   | 0                   |
| SBS8            | NHEJ.ID         | 3.00E-05            | 1                   |
| NHEJ.ID         | AID.APOBEC.DBS  | 0.03768             | 0.99552             |
| DBS4            | AID.APOBEC.DBS  | 0.99913             | 0.00572             |
| DBS9            | AID.APOBEC.DBS  | 0.02254             | 1                   |
| SBS8            | DBS2            | 1                   | 0                   |
| MMRd            | DBS2            | 0.00084             | 1                   |
| ID1             | DBS2            | 0.01447             | 1                   |
| ID2             | DBS2            | 0.00735             | 1                   |
| ID3             | DBS2            | 0.02794             | 1                   |
| MMRd.ID         | DBS2            | 0.02794             | 1                   |
| NHEJ.ID         | DBS2            | 0.00011             | 1                   |
| SBS8            | DBS4            | 1                   | 4.00E-05            |
| POLE            | DBS4            | 0.01148             | 1                   |
| MMRd            | DBS4            | 0.00107             | 0.99989             |
| ID1             | DBS4            | 0.00851             | 0.99928             |
| ID2             | DBS4            | 0.0031              | 0.99978             |
| ID3             | DBS4            | 0.02213             | 0.99776             |
| MMRd.ID         | DBS4            | 0.00224             | 1                   |
| NHEJ.ID         | DBS4            | 0.00304             | 0.99948             |
| DBS2            | DBS4            | 1                   | 0                   |
| SBS8            | DBS6            | 1                   | 0                   |
| MMRd            | DBS6            | 0.00255             | 1                   |
| ID1             | DBS6            | 0.02797             | 1                   |
| ID2             | DBS6            | 0.0158              | 1                   |
| ID3             | DBS6            | 0.04869             | 1                   |
| MMRd.ID         | DBS6            | 0.04869             | 1                   |
| NHEJ.ID         | DBS6            | 0.03251             | 0.99416             |
| DBS2            | DBS6            | 1                   | 4.00E-05            |
| DBS4            | DBS6            | 0.99778             | 0.01021             |
| APOBEC          | DBS9            | 0.04536             | 0.98801             |
| ID3             | DBS9            | 0.04058             | 1                   |

**Table S3:** Interaction of mutational signatures with each other in UCEC WES tumors analyzed by NMF-based approach. P value of co-occurrence and exclusivity of mutational signatures is measured by hypergeometric test. Also, see Figure2.

| Signature_pair1 | Signature_pair2 | P value_Exclusivity | P value_Coocurrence |
|-----------------|-----------------|---------------------|---------------------|
| ID1             | ID10            | 0                   | 1                   |
| ID1             | ID11            | 0                   | 1                   |
| ID1             | ID83B           | 1                   | 0                   |
| ID1             | MMRd.DBS        | 0.99933             | 0.00127             |
| ID1             | Aging           | 0.99771             | 0.00832             |
| ID1             | APOBEC          | 0                   | 1                   |
| ID1             | HRd             | 0                   | 1                   |
| ID1             | SBS7b           | 0.00083             | 0.99983             |
| ID1             | MSI.POLE        | 1                   | 2.00E-05            |
| ID1             | MMRd            | 1                   | 0                   |
| ID1             | SBS54           | 1                   | 2.00E-05            |
| ID1             | TCT             | 0                   | 1                   |
| ID10            | ID11            | 0.00267             | 0.99938             |
| ID10            | ID83B           | 0                   | 1                   |
| ID10            | SBS7b           | 0.99781             | 0.00892             |
| ID10            | MMRd            | 0.01375             | 0.99333             |
| ID10            | SBS54           | 0.03443             | 1                   |
| ID11            | ID83B           | 0                   | 1                   |
| ID11            | MMRd.DBS        | 0.01984             | 0.98939             |
| ID11            | MSI.POLE        | 0.0168              | 1                   |
| ID11            | MMRd            | 0.0479              | 0.97042             |
| ID83B           | APOBEC          | 0                   | 1                   |
| ID83B           | HRd             | 0                   | 1                   |
| ID83B           | SBS5            | 0.98882             | 0.0331              |
| ID83B           | POLE            | 0                   | 1                   |
| ID83B           | MMRd            | 1                   | 0                   |
| ID83B           | SBS54           | 1                   | 0                   |
| ID83B           | TCT             | 0                   | 1                   |
| MMRd.DBS        | SBS5            | 0.00112             | 0.99968             |
| MMRd.DBS        | POLE            | 0.99853             | 0.00292             |
| MMRd.DBS        | MSI.POLE        | 1                   | 0                   |
| MMRd.DBS        | TCT             | 0.04045             | 0.9758              |
| Aging           | MMRd            | 0.00021             | 0.99997             |
| Aging           | TCT             | 0                   | 1                   |
| APOBEC          | HRd             | 0.99997             | 0.00012             |
| APOBEC          | MMRd            | 0                   | 1                   |
| APOBEC          | SBS54           | 0.01823             | 1                   |
| HRd             | SBS5            | 0                   | 1                   |
| HRd             | MMRd            | 0                   | 1                   |
| SBS5            | POLE            | 1.00E-05            | 1                   |
| SBS5            | MMRd            | 0.97844             | 0.04798             |
| SBS7b           | POLE            | 0.04241             | 0.99038             |
| POLE            | MSI.POLE        | 0.99946             | 0.00266             |
| POLE            | MMRd            | 0.00025             | 0.99989             |
| MSI.POLE        | MMRd            | 0.99999             | 1.00E-04            |
| MSI.POLE        | AzT             | 0.99875             | 0.02291             |
| MMRd            | SBS54           | 1                   | 0                   |
| SBS54           | TCT             | 0.04271             | 0.99034             |

**Table S4:** Interaction of mutational signatures with each other in UCEC WGS tumors analyzed by multivariate-based approach. P value of co-occurrence and exclusivity of mutational signatures is measured by hypergeometric test. Also, see Additional file1: Fig. S3.

| Signature_pair1 | Signature_pair2 | P value_Exclusivity | P value_Coocurrence |
|-----------------|-----------------|---------------------|---------------------|
| Aging           | MMRd            | 0.03321             | 1                   |
| APOBEC          | HRd             | 1                   | 0.00012             |
| APOBEC          | SBS5            | 1                   | 0.00012             |
| APOBEC          | MMRd            | 0                   | 1                   |
| APOBEC          | SBS8            | 0.99899             | 0.01181             |
| HRd             | SBS5            | 0.99994             | 0.00033             |
| HRd             | MMRd            | 0                   | 1                   |
| HRd             | SBS8            | 0.99915             | 0.00373             |
| HRd             | POLE            | 0.0051              | 1                   |
| HRd             | MSI.POLE        | 0.01531             | 1                   |
| SBS5            | MMRd            | 0.00165             | 0.99976             |
| SBS5            | SBS8            | 1                   | 0                   |
| SBS5            | POLE            | 0.0051              | 1                   |
| MMRd            | POLE            | 0.99987             | 0.00392             |
| MMRd            | MSI.POLE        | 1                   | 0.00089             |
| MMRd            | ROS             | 0.00462             | 0.99932             |

**Table S5:** Interaction of mutational signatures with each other in ovarian WGS tumors analyzed by NMF-based approach. P value of co-occurrence and exclusivity of mutational signatures is measured by hypergeometric test. Also, see Figure3.

| Signature_pair1 | Signature_pair2 | P value_Exclusivity | P value_Coocurrence |
|-----------------|-----------------|---------------------|---------------------|
| APOBEC          | HRd             | 0.9956              | 0.01133             |
| APOBEC          | SBS8            | 0.99929             | 0.00224             |
| APOBEC          | SBS39           | 0.01644             | 0.9983              |
| APOBEC          | SBS60           | 1                   | 0.00467             |
| APOBEC          | DBS2            | 1                   | 0                   |
| APOBEC          | DBS4            | 0.99588             | 0.01132             |
| APOBEC          | DBS6            | 0.99925             | 0.00228             |
| HRd             | SBS39           | 2.00E-05            | 1                   |
| HRd             | SBS60           | 1                   | 0.03661             |
| HRd             | ID1             | 0                   | 1                   |
| HRd             | ID2             | 0.00044             | 1                   |
| HRd             | NHEJ.ID         | 0.99969             | 0.00186             |
| HRd             | ID83C.ID        | 9.00E-05            | 0.99998             |
| HRd             | DBS2            | 0.99994             | 0.00023             |
| HRd             | DBS4            | 0.99992             | 3.00E-04            |
| HRd             | DBS6            | 0.99835             | 0.00453             |
| SBS5            | SBS8            | 1                   | 0.0058              |
| SBS5            | DBS2            | 0.99926             | 0.01165             |
| SBS5            | DBS6            | 1                   | 0.0353              |
| SBS8            | SBS39           | 0.99704             | 0.01845             |
| SBS8            | ID1             | 0.99726             | 0.00883             |
| SBS8            | NHEJ.ID         | 0.99021             | 0.03227             |
| SBS8            | ID83C.ID        | 0.9994              | 0.0018              |
| SBS8            | DBS2            | 1                   | 0                   |
| SBS8            | DBS4            | 1                   | 0                   |
| SBS8            | DBS6            | 0.99987             | 0.00044             |
| SBS8            | DBS9            | 0.99136             | 0.02219             |
| Aflatoxin       | DBS2            | 0.02912             | 1                   |
| MMRd            | Genotoxicity    | 1                   | 0.00637             |
| BERd            | DBS2            | 0.01185             | 0.99873             |
| PT              | PT.DBS          | 1                   | 1.00E-05            |
| SBS60           | DBS6            | 1                   | 0.01199             |
| ID1             | ID2             | 1                   | 1.00E-05            |
| ID1             | ID83C.ID        | 1                   | 0                   |
| ID2             | ID83C.ID        | 0.99405             | 0.03589             |
| NHEJ.ID         | ID83C.ID        | 0.00186             | 0.99969             |
| NHEJ.ID         | DBS2            | 0.99571             | 0.01614             |
| NHEJ.ID         | DBS4            | 0.99997             | 2.00E-04            |
| NHEJ.ID         | DBS6            | 0.99987             | 0.00118             |
| ID83C.ID        | DBS2            | 0.99173             | 0.02038             |
| DBS2            | DBS4            | 1                   | 0                   |
| DBS2            | PT.DBS          | 0.99549             | 0.01784             |
| DBS2            | DBS6            | 1                   | 0                   |
| DBS2            | DBS9            | 0.99314             | 0.02012             |
| DBS4            | DBS6            | 0.99996             | 0.00017             |
| DBS4            | DBS9            | 0.9801              | 0.04739             |
| DBS6            | DBS9            | 0.98439             | 0.03625             |

**Table S6:** Interaction of mutational signatures with each other in ovarian WES tumors analyzed by NMF-based approach. P value of co-occurrence and exclusivity of mutational signatures is measured by hypergeometric test. Also, see Figure4.

| Signature_pair1 | Signature_pair2 | P value_Exclusivity | P value_Coocurrence |
|-----------------|-----------------|---------------------|---------------------|
| Aging           | HRd             | 0.99953             | 0.00511             |
| Aging           | SBS49           | 0.0386              | 0.99967             |
| Aging           | SBS53           | 0.0386              | 0.99967             |
| APOBEC          | SBS5            | 0.00044             | 0.99986             |
| APOBEC          | AID.APOBEC.DBS  | 0.99936             | 0.00188             |
| HRd             | SBS5            | 0                   | 1                   |
| HRd             | SBS7b           | 0.01979             | 0.9927              |
| HRd             | MMRd            | 0.00767             | 0.99665             |
| HRd             | DBS2            | 1                   | 1.00E-05            |
| HRd             | DBS4            | 0.99749             | 0.0097              |
| HRd             | DBS9            | 0.99958             | 0.00122             |
| SBS5            | DBS2            | 0.04646             | 0.9814              |
| SBS5            | DBS4            | 0.01837             | 0.99324             |
| SBS7b           | ID83B           | 0.99876             | 0.00437             |
| SBS7b           | AID.APOBEC.DBS  | 0.99978             | 0.00098             |
| MMRd            | DBS6            | 0.01614             | 0.99803             |
| SBS49           | SBS53           | 0.99999             | 0.00972             |
| ID14            | ID83B           | 0.01309             | 0.99616             |
| ID16            | ID83B           | 0                   | 1                   |
| ID83B           | AID.APOBEC.DBS  | 0.99998             | 7.00E-05            |
| DBS2            | DBS6            | 0.04239             | 1                   |
| DBS2            | DBS9            | 0.00014             | 1                   |
| DBS4            | DBS9            | 0.00404             | 0.99936             |
| DBS6            | DBS9            | 0.01159             | 0.99789             |
| DBS6            | AID.APOBEC.DBS  | 0.00297             | 1                   |
| DBS9            | AID.APOBEC.DBS  | 2.00E-05            | 1                   |

**Table S7:** Interaction of mutational signatures with each other in ovarian WGS tumors analyzed by multivariate-based approach. P value of co-occurrence and exclusivity of mutational signatures is measured by hypergeometric test. Also, see Additional file 1: Fig. S6.

| Signature_pair1 | Signature_pair2 | P value_Exclusivity | P value_Coocurrence |
|-----------------|-----------------|---------------------|---------------------|
| Aging           | MMRd            | 0.01274             | 1                   |
| APOBEC          | SBS8            | 0.99995             | 0.00115             |
| HRd             | SBS5            | 0.99884             | 0.01184             |
| HRd             | MMRd            | 0.00229             | 1                   |
| HRd             | SBS8            | 0.9997              | 0.00371             |
| HRd             | ROS             | 0.00804             | 0.9992              |
| SBS5            | SBS8            | 1                   | 0                   |
| SBS5            | ROS             | 3.00E-04            | 0.99996             |
| SBS8            | ROS             | 0                   | 1                   |

**Table S8:** Interaction of mutational signatures with each other in cervical WES tumors analyzed by NMF-based approach. P value of co-occurrence and exclusivity of mutational signatures is measured by hypergeometric test. Also, see Figure5.

| Signature_pair1 | Signature_pair2 | P value_Exclusivity | P value_Coocurrence |
|-----------------|-----------------|---------------------|---------------------|
| Aging           | APOBEC          | 1                   | 0.0217              |
| Aging           | MMRd            | 0.03439             | 1                   |
| Aging           | TCT             | 0.00908             | 1                   |
| APOBEC          | SBS5            | 0.04996             | 1                   |
| APOBEC          | POLE            | 0.99647             | 0.00937             |
| APOBEC          | MMRd            | 0.00467             | 0.99854             |
| APOBEC          | TCT             | 0.00326             | 0.99926             |
| APOBEC          | ID1             | 0.04659             | 0.98164             |
| APOBEC          | AID.APOBEC.DBS  | 0.99807             | 0.01086             |
| HRd             | SBS5            | 0.03143             | 0.99614             |
| HRd             | DBS4            | 1                   | 1.00E-05            |
| POLE            | TCT             | 0                   | 1                   |
| POLE            | ID2             | 0.02358             | 0.99496             |
| POLE            | MMRd.ID         | 0.04974             | 0.97929             |
| MMRd            | TCT             | 0.99964             | 0.00159             |
| MMRd            | ID2             | 0.9997              | 0.00203             |
| MMRd            | MMRd.ID         | 0.98523             | 0.04078             |
| Genotoxicity    | MMRd.DBS        | 1                   | 0.04498             |
| ID1             | ID2             | 0.99947             | 0.00344             |
| ID1             | ID83B           | 0                   | 1                   |
| ID2             | MMRd.ID         | 1                   | 3.00E-05            |
| ID2             | ID83B           | 0                   | 1                   |
| ID2             | MMRd.DBS        | 0.99742             | 0.02372             |
| MMRd.ID         | ID83B           | 0                   | 1                   |
| ID83B           | AID.APOBEC.DBS  | 0.98432             | 0.03867             |

**Table S9:** Interaction of mutational signatures with each other in (A) uterine, (B) ovarian and (C) cervical cell lines analyzed by NMF-based approach. P value of co-occurrence and exclusivity of mutational signatures is measured by hypergeometric test. Also, see Additional file 1: Fig. S15, S16, S17.

**A**

| Signature_pair1 | Signature_pair2 | P value_Exclusivity | P value_Coocurrence |
|-----------------|-----------------|---------------------|---------------------|
| Aging           | SBS5            | 1                   | 0.00769             |
| Aging           | ID2             | 0.04241             | 1                   |
| MMRd            | POLE            | 0.01991             | 1                   |
| MMRd            | ID2             | 1                   | 0                   |
| MMRd            | MMRd.ID         | 1                   | 4.00E-05            |
| POLE            | MMRd.ID         | 0.04241             | 1                   |
| ID2             | MMRd.ID         | 1                   | 0                   |
| MMRd.DBS        | AID.APOBEC.DBS  | 6.00E-05            | 1                   |

**B**

| Signature_pair1 | Signature_pair2 | P value_Exclusivity | P value_Coocurrence |
|-----------------|-----------------|---------------------|---------------------|
| Aging           | HRd             | 0.04405             | 0.99719             |
| Aging           | TCT             | 0.04261             | 1                   |
| HRd             | UVL             | 0.99892             | 0.00719             |
| HRd             | ID2             | 0.02386             | 1                   |
| HRd             | MMRd.ID         | 0.02386             | 1                   |
| HRd             | NHEJ.ID         | 0.99158             | 0.03319             |
| UVL             | ID2             | 0.04851             | 1                   |
| UVL             | MMRd.ID         | 0.04851             | 1                   |
| POLE            | ID1             | 1                   | 0.03355             |
| MMRd            | TCT             | 0.9999              | 0.00061             |
| MMRd            | ID2             | 1                   | 0.00015             |
| MMRd            | MMRd.ID         | 0.99985             | 0.00244             |
| TCT             | ID2             | 0.02271             | 0.99669             |
| TCT             | MMRd.ID         | 0.02271             | 0.99669             |
| TCT             | AID.APOBEC.DBS  | 0.98546             | 0.04794             |
| ID1             | NHEJ.ID         | 0.00039             | 0.99995             |
| ID1             | DBS2            | 0.99498             | 0.04305             |
| ID2             | MMRd.ID         | 1                   | 0                   |
| ID2             | NHEJ.ID         | 3.00E-04            | 1                   |
| MMRd.ID         | NHEJ.ID         | 3.00E-04            | 1                   |
| DBS4            | AID.APOBEC.DBS  | 0.0035              | 1                   |
| PT.DBS          | AID.APOBEC.DBS  | 0.03134             | 1                   |

**C**

| Signature_pair1 | Signature_pair2 | P value_Exclusivity | P value_Coocurrence |
|-----------------|-----------------|---------------------|---------------------|
| SBS5            | ID2             | 0.04762             | 1                   |
| SBS5            | MMRd            | 0.04762             | 1                   |
| SBS5            | NHEJ            | 1                   | 0.04762             |
| ID2             | MMRd            | 1                   | 0.04762             |
| ID2             | NHEJ            | 0.04762             | 1                   |
| MMRd            | NHEJ            | 0.04762             | 1                   |
