# Supplementary material for: Mutational signatures reveal ternary relationships between homologous recombination repair, APOBEC, and mismatch repair in gynecological cancers
Source: J Transl Med. 2022 Feb 2;20:65. doi: 10.1186/s12967-022-03259-0 (PMC8812249; doi:10.1186/s12967-022-03259-0)
Supplement: Supplementary file 2 — Additional file 2. Supplementary tables (Table S1 A~X) provide results of mutational signature analysis by NMF-based and multivariate approach. [file 12967_2022_3259_MOESM2_ESM.xlsx]

## Sheet: Legend
Table S1
A	Results of UCEC WGS tumors analysed by Multivariate approach
B	Results of ovarian WGS tumors analysed by Multivariate approach
C	Results of cervical WGS tumors analysed by Multivariate approach
D	Results of UCEC WES tumors analysed by Multivariate approach
E	Results of ovarian WES tumors analysed by Multivariate approach
F	Results of cervical WES tumors analysed by Multivariate approach
G	Results of UCEC WGS tumors SBS signatures analysed by NMF-based approach
H	Results of UCEC WGS tumors ID signatures analysed by NMF-based approach
I	Results of UCEC WGS tumors DBS signatures analysed by NMF-based approach
J	Results of UCEC WES tumors SBS signatures analysed by NMF-based approach
K	Results of UCEC WES tumors ID signatures analysed by NMF-based approach
L	Results of UCEC WES tumors DBS signatures analysed by NMF-based approach
M	Results of ovarian WGS tumors SBS signatures analysed by NMF-based approach
N	Results of ovarian WGS tumors ID signatures analysed by NMF-based approach
O	Results of ovarian WGS tumors DBS signatures analysed by NMF-based approach
P	Results of ovarian WES tumors SBS signatures analysed by NMF-based approach
Q	Results of ovarian WES tumors ID signatures analysed by NMF-based approach
R	Results of ovarian WES tumors DBS signatures analysed by NMF-based approach
S	Results of cervical WGS tumors SBS signatures analysed by NMF-based approach
T	Results of cervical WGS tumors ID signatures analysed by NMF-based approach
U	Results of cervical WGS tumors DBS signatures analysed by NMF-based approach
V	Results of cervical WES tumors SBS signatures analysed by NMF-based approach
W	Results of cervical WES tumors ID signatures analysed by NMF-based approach
X	Results of cervical WES tumors DBS signatures analysed by NMF-based approach

## Sheet: (A)UCEC-WGS-Mult.
Malignancy	Assay	Approach	Samples	SBS1_exp	SBS2_exp	SBS3_exp	SBS5_exp	SBS6_exp	SBS8_exp	SBS10_exp	SBS13_exp	SBS14_exp	SBS15_exp	SBS18_exp	SBS20_exp	SBS21_exp	SBS26_exp
UCEC	WGS	Multivariate	SA598014	0.0625789	0.014754	0.413395	0.134253	0	0.343697	0	0.0313235	0	0	0	0	0	0
UCEC	WGS	Multivariate	SA598012	0.0568456	0.0152001	0.397524	0.171605	0	0.324207	0	0.034618	0	0	0	0	0	0
UCEC	WGS	Multivariate	SA598046	0.16005	0.0220266	0.227752	0.425594	0	0.150867	0	0.0137112	0	0	0	0	0	0
UCEC	WGS	Multivariate	SA598040	0.15461	0.0208942	0.311627	0.341474	0	0.157601	0	0.0137932	0	0	0	0	0	0
UCEC	WGS	Multivariate	SA598026	0.145491	0.0163415	0.380324	0.303471	0	0.139815	0	0.0145576	0	0	0	0	0	0
UCEC	WGS	Multivariate	SA598029	0.153529	0.0157269	0.335983	0.348555	0	0.123971	0	0.0222348	0	0	0	0	0	0
UCEC	WGS	Multivariate	SA598067	0.191881	0.0327977	0.297434	0.266386	0	0.178774	0	0.0327269	0	0	0	0	0	0
UCEC	WGS	Multivariate	SA598062	0.189035	0.0335282	0.239547	0.305898	0	0.198341	0	0.0336501	0	0	0	0	0	0
UCEC	WGS	Multivariate	SA601527	0.56246	0.0247402	0.127817	0.194899	0	0.0625021	0	0.0208335	0	0	0.00674744	0	0	0
UCEC	WGS	Multivariate	SA601538	0.598365	0.0205518	0.134076	0.144953	0	0.0594486	0	0.021997	0	0	0.0206078	0	0	0
UCEC	WGS	Multivariate	SA601548	0.0739828	0.00679881	0	0.288657	0.437508	0	0	0.000130571	0.000926123	0	0	0.191997	0	0
UCEC	WGS	Multivariate	SA601545	0.07305	0.00846202	0	0.284544	0.425444	0	0	0.000665762	0.00785832	0	0	0.199975	0	0
UCEC	WGS	Multivariate	SA601569	0.269905	0.0447889	0.321855	0.256329	0	0.0704546	0	0.0366673	0	0	0	0	0	0
UCEC	WGS	Multivariate	SA601559	0.213075	0.0185507	0.273552	0.373981	0	0.0948555	0	0.0259851	0	0	0	0	0	0
UCEC	WGS	Multivariate	SA460564	0.670251	0.242812	0	0	0	0	0	0.0712976	0	0	0.0156393	0	0	0
UCEC	WGS	Multivariate	SA459470	0.499284	0.266069	0.103242	0.129298	0	0	0	0	0	0	0.0021064	0	0	0
UCEC	WGS	Multivariate	SA461590	0.893242	0	0	0	0	0	0	0	0	0	0.106758	0	0	0
UCEC	WGS	Multivariate	SA599092	0.112966	0.0942069	0.184035	0.301312	0	0.18325	0	0.124229	0	0	0	0	0	0
UCEC	WGS	Multivariate	SA599088	0.110064	0.087025	0.164012	0.324244	0	0.191642	0	0.123013	0	0	0	0	0	0
UCEC	WGS	Multivariate	SA599166	0.099226	0.0177279	0.25593	0.434303	0	0.164828	0	0.0279843	0	0	0	0	0	0
UCEC	WGS	Multivariate	SA599169	0.0958715	0.0242222	0.284676	0.381194	0	0.191745	0	0.0222909	0	0	0	0	0	0
UCEC	WGS	Multivariate	SA599157	0.373326	0.0365788	0.111915	0.362206	0	0.0599443	0	0.017611	0	0	0.038419	0	0	0
UCEC	WGS	Multivariate	SA599154	0.364656	0.046944	0.0821108	0.358653	0	0.0868867	0	0.0213868	0	0	0.0393625	0	0	0
UCEC	WGS	Multivariate	SA599175	0.281562	0.0977887	0.146942	0.326186	0	0.0552866	0	0.0831226	0	0	0.00911249	0	0	0
UCEC	WGS	Multivariate	SA599177	0.292305	0.10249	0.149314	0.306898	0	0.0510666	0	0.08499	0	0	0.0129364	0	0	0
UCEC	WGS	Multivariate	SA599098	0.0795718	0.00329022	0.503665	0.248772	0	0.109507	0	0.0551949	0	0	0	0	0	0
UCEC	WGS	Multivariate	SA599102	0.0633653	0.0059317	0.480599	0.239592	0	0.161528	0	0.0489843	0	0	0	0	0	0
UCEC	WGS	Multivariate	SA599118	0.07387	0.00130148	0	0.165574	0.499914	0.164676	0	0	0	0	0	0.0142358	0.0289166	0.0515124
UCEC	WGS	Multivariate	SA599123	0.169256	0	0	0.0310142	0.457161	0.153935	0	0	0	0	0	0.0573207	0	0.131313
UCEC	WGS	Multivariate	SA599112	0.285078	0.0879442	0	0.402049	0	0.143074	0	0.0620544	0	0	0.0198003	0	0	0
UCEC	WGS	Multivariate	SA599107	0.298408	0.0897346	0	0.403728	0	0.150838	0	0.0483095	0	0	0.00898259	0	0	0
UCEC	WGS	Multivariate	SA599146	0.0990919	0.0773044	0.19281	0.622519	0	0	0	0.00827487	0	0	0	0	0	0
UCEC	WGS	Multivariate	SA599143	0.161582	0.00658814	0.364732	0.388732	0	0.0578066	0	0.0205591	0	0	0	0	0	0
UCEC	WGS	Multivariate	SA599132	0.305622	0.135011	0.0504004	0.28348	0	0.0858119	0	0.123384	0	0	0.0162905	0	0	0
UCEC	WGS	Multivariate	SA599136	0.298057	0.129312	0.0808664	0.282864	0	0.0686008	0	0.116944	0	0	0.023356	0	0	0
UCEC	WGS	Multivariate	SA463369	0.414665	0.117333	0.226906	0	0	0	0	0.181484	0	0	0.0596118	0	0	0
UCEC	WGS	Multivariate	SA514242	0.911538	0.0821928	0.0041341	0	0	0	0	0.00213487	0	0	0	0	0	0
UCEC	WGS	Multivariate	SA477133	0.160698	0	0	0	0.768541	0	0	0	0	0	0.0123887	0	0.0260311	0.0323417
UCEC	WGS	Multivariate	SA488516	0.700556	0	0.265023	0	0	0	0	0.0344204	0	0	0	0	0	0
UCEC	WGS	Multivariate	SA476431	0.689362	0.0635351	0	0	0	0.232792	0	0	0	0	0.0143107	0	0	0
UCEC	WGS	Multivariate	SA475881	0.386176	0.056149	0.160641	0.199567	0	0	0	0.197468	0	0	0	0	0	0
UCEC	WGS	Multivariate	SA514362	0.513498	0.0101407	0.186902	0.166943	0	0	0	0.122516	0	0	0	0	0	0
UCEC	WGS	Multivariate	SA480851	0.126544	0.162598	0.521247	0	0	0	0	0.189611	0	0	0	0	0	0
UCEC	WGS	Multivariate	SA459265	0.367824	0	0	0	0.549351	0.0585809	0.0208816	0.00336183	0	0	0	0	0	0
UCEC	WGS	Multivariate	SA480023	0.256275	0.117736	0.237999	0	0	0	0	0.340978	0	0	0.0470121	0	0	0
UCEC	WGS	Multivariate	SA466124	0.583964	0.0340238	0.190703	0	0	0	0	0	0	0	0.19131	0	0	0
UCEC	WGS	Multivariate	SA465631	0.125051	0	0	0	0.724996	0	0	0.0153768	0	0	0	0	0	0.134577
UCEC	WGS	Multivariate	SA489209	0.941043	0	0	0	0	0	0	0.0102563	0	0	0.0487005	0	0	0
UCEC	WGS	Multivariate	SA478484	0.0318664	0	0	0	0.431645	0	0	0	0	0.0545766	0	0	0	0.481912
UCEC	WGS	Multivariate	SA478344	0	0.0834353	0	0.198682	0.473059	0.00215329	0	0	0.0340651	0.0878	0	0.101452	0.0193533	0
UCEC	WGS	Multivariate	SA490033	0	0	0	0	0.263112	0	0	0	0	0.0560787	0	0	0.0240969	0.656713
UCEC	WGS	Multivariate	SA489774	0.311675	0	0.268729	0.164469	0	0	0	0.255127	0	0	0	0	0	0
UCEC	WGS	Multivariate	SA471720	0.635139	0.244558	0	0.0278451	0	0	0	0	0	0	0.0924572	0	0	0
UCEC	WGS	Multivariate	SA473856	0.359606	0.00135635	0	0	0.523922	0	0	0	0	0.115115	0	0	0	0
UCEC	WGS	Multivariate	SA514358	0.314036	0.0294571	0.487996	0.000648209	0	0	0	0.0334064	0	0	0.134457	0	0	0
UCEC	WGS	Multivariate	SA473026	0.123434	0.243062	0.0367378	0.0238179	0	0	0	0.572948	0	0	0	0	0	0
UCEC	WGS	Multivariate	SA480113	0.321801	0.0642274	0.294056	0.202013	0	0	0	0	0	0	0.117903	0	0	0
UCEC	WGS	Multivariate	SA514311	0.355148	0	0.0532904	0.561276	0	0	0	0.00519114	0	0	0.0250949	0	0	0
UCEC	WGS	Multivariate	SA477288	0.383259	0	0	0	0.374503	0	0.00677941	0	0	0	0.00129399	0.147977	0.0861876	0
UCEC	WGS	Multivariate	SA468236	0.730601	0	0	0.104298	0	0	0	0.0832054	0	0	0.0818954	0	0	0
UCEC	WGS	Multivariate	SA476204	0.499762	0.0499931	0.316004	0	0	0	0	0.13424	0	0	0	0	0	0
UCEC	WGS	Multivariate	SA514439	0.770606	0.156106	0	0	0	0	0	0.0293246	0	0	0.043963	0	0	0
UCEC	WGS	Multivariate	SA484822	0.8993	0	0	0	0	0	0	0.1007	0	0	0	0	0	0
UCEC	WGS	Multivariate	SA484672	0.169342	0.0976388	0.374809	0.327512	0	0	0	0.0306978	0	0	0	0	0	0
UCEC	WGS	Multivariate	SA469543	0.458966	0.0924414	0.368539	0.00891225	0	0	0	0.0109333	0	0	0.0602087	0	0	0
UCEC	WGS	Multivariate	SA462416	0.833752	0.0326595	0	0	0	0	0.133588	0	0	0	0	0	0	0
UCEC	WGS	Multivariate	SA514319	0.279001	0.0852979	0.417062	0	0	0	0	0.205444	0	0	0.0131953	0	0	0
UCEC	WGS	Multivariate	SA462324	0.586359	0.0480782	0.0303327	0.21268	0	0	0	0.0182713	0	0	0.104279	0	0	0
UCEC	WGS	Multivariate	SA484286	0.699429	0.0187446	0.0793357	0	0	0	0	0.124067	0	0	0.0784231	0	0	0
UCEC	WGS	Multivariate	SA514437	0.355843	0	0.251481	0.226884	0	0	0	0.0981181	0	0	0.0676749	0	0	0
UCEC	WGS	Multivariate	SA461016	0.781974	0	0	0.164243	0	0.0337699	0	0.0200135	0	0	0	0	0	0
UCEC	WGS	Multivariate	SA482767	0.271057	0	0	0	0.539229	0	0.0217552	0.0160631	0	0.004927	0	0.13657	0	0.0103983
UCEC	WGS	Multivariate	SA460859	0.804257	0.0108743	0.165009	0	0	0.00434424	0	0	0	0	0.015515	0	0	0
UCEC	WGS	Multivariate	SA460515	0.1015	0	0	0	0	0	0.848274	0	0	0.0437456	0.0064803	0	0	0
UCEC	WGS	Multivariate	SA482408	0.926027	0	0.0258547	0	0	0	0	0	0	0	0.0481179	0	0	0
UCEC	WGS	Multivariate	SA468892	0.333495	0	0	0	0.0744321	0	0	0	0	0.592072	0	0	0	0
UCEC	WGS	Multivariate	SA514298	0.689055	0.104201	0.00558492	0.0513956	0	0	0	0.141694	0	0	0.00806953	0	0	0
UCEC	WGS	Multivariate	SA514228	0.909412	0	0	0	0	0	0	0.0905882	0	0	0	0	0	0
UCEC	WGS	Multivariate	SA467449	0.479531	0	0	0	0.394532	0	0	0	0	0	0	0.125937	0	0
UCEC	WGS	Multivariate	SA474315	0.779717	0.116993	0	0.00215322	0	0	0	0.0111974	0	0	0.0899394	0	0	0
UCEC	WGS	Multivariate	SA598001	0.21679	0.0235107	0.314438	0.22956	0	0.0912284	0	0.0490611	0	0	0.0754128	0	0	0
UCEC	WGS	Multivariate	SA598013	0.215194	0.0197203	0.277562	0.2884	0	0.0805389	0	0.0497579	0	0	0.068827	0	0	0
UCEC	WGS	Multivariate	SA598018	0.320587	0.027036	0.195902	0.389006	0	0.0298769	0	0.0375921	0	0	0	0	0	0
UCEC	WGS	Multivariate	SA598017	0.322252	0.0197205	0.139964	0.378841	0	0.0975799	0	0.041643	0	0	0	0	0	0
UCEC	WGS	Multivariate	SA598027	0.333599	0.0425675	0	0.574799	0	0	0	0.0177816	0	0	0.0312531	0	0	0
UCEC	WGS	Multivariate	SA598025	0.336942	0.0332219	0	0.576252	0	0	0	0.0142948	0	0	0.0392887	0	0	0
UCEC	WGS	Multivariate	SA598003	0.143416	0.150834	0.163668	0.22036	0	0.00334764	0	0.283877	0	0	0.034497	0	0	0
UCEC	WGS	Multivariate	SA598002	0.152173	0.159554	0.18342	0.174132	0	0.00585858	0	0.29071	0	0	0.0341516	0	0	0
UCEC	WGS	Multivariate	SA471917	0.574672	0.262491	0.0872681	0	0	0	0	0.0743456	0	0	0.00122376	0	0	0
UCEC	WGS	Multivariate	SA464675	0.144966	0	0	0	0.181633	0	0	0	0.46622	0.207181	0	0	0	0
UCEC	WGS	Multivariate	SA473193	0.160816	0.0855478	0.228553	0	0	0	0	0.484761	0	0	0.0403231	0	0	0

## Sheet: (B)ovarian-WGS-Mult.
Malignancy	Assay	Approach	Samples	SBS1_exp	SBS2_exp	SBS3_exp	SBS5_exp	SBS6_exp	SBS8_exp	SBS13_exp	SBS15_exp	SBS18_exp	SBS21_exp	SBS26_exp
Ovarian	WGS	Multivariate	SA518422	0.908217	0	0	0	0.0769841	0	0	0	0	0.0147987	0
Ovarian	WGS	Multivariate	SA505872	0.157361	0.0447773	0.344303	0.233272	0	0.142114	0.0781728	0	0	0	0
Ovarian	WGS	Multivariate	SA505825	0	0	0	0.435683	0	0.0337514	0.0273709	0.0309059	0	0	0.472289
Ovarian	WGS	Multivariate	SA505861	0.0729349	0.0234584	0.559284	0.20892	0	0.0952121	0.0401909	0	0	0	0
Ovarian	WGS	Multivariate	SA505840	0.0765642	0.0165296	0.581093	0.195866	0	0.0888897	0.0410572	0	0	0	0
Ovarian	WGS	Multivariate	SA505846	0.0711875	0.0205809	0.67482	0.163983	0	0.0378604	0.0315678	0	0	0	0
Ovarian	WGS	Multivariate	SA505809	0.137545	0	0.0889922	0.263517	0	0.193413	0.0509067	0	0.265626	0	0
Ovarian	WGS	Multivariate	SA505796	0.063826	0.0145666	0.610841	0.196216	0	0.0507613	0.0637886	0	0	0	0
Ovarian	WGS	Multivariate	SA505781	0.17453	0.0383267	0.189856	0.405522	0	0.163622	0.0281442	0	0	0	0
Ovarian	WGS	Multivariate	SA505768	0.283975	0.0355805	0.304443	0.293632	0	0.0633259	0.0190432	0	0	0	0
Ovarian	WGS	Multivariate	SA505754	0.171215	0.0613477	0.255602	0.312617	0	0.12381	0.0754089	0	0	0	0
Ovarian	WGS	Multivariate	SA505727	0.236302	0.00949969	0.23248	0.368838	0	0.0814518	0.0714285	0	0	0	0
Ovarian	WGS	Multivariate	SA505738	0.2013	0.0241155	0.317235	0.23006	0	0.202138	0.0251514	0	0	0	0
Ovarian	WGS	Multivariate	SA505701	0.281524	0.0234254	0.180154	0.295071	0	0.202485	0.0173412	0	0	0	0
Ovarian	WGS	Multivariate	SA505711	0.0557526	0.009118	0.510687	0.198106	0	0.198024	0.0283128	0	0	0	0
Ovarian	WGS	Multivariate	SA505690	0.0555365	0.0184545	0.525285	0.196165	0	0.18588	0.0186787	0	0	0	0
Ovarian	WGS	Multivariate	SA505675	0.077296	0.00959552	0.495537	0.259998	0	0.132153	0.0254207	0	0	0	0
Ovarian	WGS	Multivariate	SA505662	0.0982176	0.0290782	0.497148	0.209844	0	0.127258	0.0384549	0	0	0	0
Ovarian	WGS	Multivariate	SA505657	0.0308223	0.0134009	0.532234	0.213943	0	0.160532	0.0490679	0	0	0	0
Ovarian	WGS	Multivariate	SA505646	0.0314891	0.0107674	0.441686	0.290599	0	0.173994	0.0514637	0	0	0	0
Ovarian	WGS	Multivariate	SA505632	0.0919708	0.0141537	0.609667	0.251452	0	0.00383606	0.0289204	0	0	0	0
Ovarian	WGS	Multivariate	SA505621	0.0945349	0.040125	0.502687	0.219203	0	0.126351	0.0170993	0	0	0	0
Ovarian	WGS	Multivariate	SA505608	0.0529025	0.101764	0.343511	0.205943	0	0.138601	0.157279	0	0	0	0
Ovarian	WGS	Multivariate	SA505596	0.069512	0.0193668	0.520626	0.198466	0	0.161147	0.0308819	0	0	0	0
Ovarian	WGS	Multivariate	SA505583	0.0738489	0.00921464	0.533164	0.234888	0	0.12601	0.0228745	0	0	0	0
Ovarian	WGS	Multivariate	SA505569	0.0823961	0.0398587	0.46111	0.200655	0	0.145142	0.0708383	0	0	0	0
Ovarian	WGS	Multivariate	SA505545	0.101897	0.0188474	0.396835	0.272136	0	0.0896755	0.120609	0	0	0	0
Ovarian	WGS	Multivariate	SA505557	0.114997	0.00184361	0.407464	0.20752	0	0.25626	0.0119163	0	0	0	0
Ovarian	WGS	Multivariate	SA505539	0.17237	0.127744	0.305217	0.104437	0	0.144318	0.145913	0	0	0	0
Ovarian	WGS	Multivariate	SA505528	0.207941	0.0767756	0.264331	0.189467	0	0.177436	0.0840496	0	0	0	0
Ovarian	WGS	Multivariate	SA505498	0.0677844	0.025405	0.614569	0.0840215	0	0.197409	0	0	0.0108113	0	0
Ovarian	WGS	Multivariate	SA505493	0.0967665	0.0191073	0.55263	0.167961	0	0.144908	0.0186272	0	0	0	0
Ovarian	WGS	Multivariate	SA505491	0.0711387	0.0252318	0.529171	0.14934	0	0.204558	0.0205594	0	0	0	0
Ovarian	WGS	Multivariate	SA505517	0.0807438	0.0234779	0.574147	0.135928	0	0.17368	0.012024	0	0	0	0
Ovarian	WGS	Multivariate	SA505478	0.0710374	0	0.52716	0.206911	0	0.125972	0.0372541	0	0.0316654	0	0
Ovarian	WGS	Multivariate	SA505457	0.0757067	0.011846	0.498721	0.243786	0	0.122776	0.0471632	0	0	0	0
Ovarian	WGS	Multivariate	SA505463	0.0596283	0.00597473	0.552113	0.259994	0	0.0857342	0.0365557	0	0	0	0
Ovarian	WGS	Multivariate	SA505432	0.0958481	0.0315923	0.322628	0.252397	0	0.271928	0.0256068	0	0	0	0
Ovarian	WGS	Multivariate	SA505447	0.0853475	0.0243475	0.335282	0.251735	0	0.271428	0.0318602	0	0	0	0
Ovarian	WGS	Multivariate	SA505415	0.0769795	0.0163285	0.543153	0.16853	0	0.168739	0.0262693	0	0	0	0
Ovarian	WGS	Multivariate	SA505403	0.338723	0.0630745	0.145739	0.242393	0	0.196489	0.0135816	0	0	0	0
Ovarian	WGS	Multivariate	SA505388	0.327108	0.0341994	0.12021	0.360128	0	0.136869	0.0214856	0	0	0	0
Ovarian	WGS	Multivariate	SA505378	0.0776592	0.0525321	0.517793	0.103465	0	0.142501	0.10605	0	0	0	0
Ovarian	WGS	Multivariate	SA505364	0.12377	0.0168971	0.412475	0.263694	0	0.0872791	0.0958839	0	0	0	0
Ovarian	WGS	Multivariate	SA505352	0.0533881	0.0560014	0.454035	0.150999	0	0.21622	0.0693568	0	0	0	0
Ovarian	WGS	Multivariate	SA505338	0.0730119	0.0148499	0.592082	0.176541	0	0.10596	0.0375551	0	0	0	0
Ovarian	WGS	Multivariate	SA505321	0.0527965	0.00954206	0.474182	0.183634	0	0.263863	0.0159832	0	0	0	0
Ovarian	WGS	Multivariate	SA505309	0.338562	0.0114121	0.214522	0.279554	0	0.127632	0.0283171	0	0	0	0
Ovarian	WGS	Multivariate	SA505298	0.291918	0.0169041	0.198222	0.288778	0	0.170632	0.0335458	0	0	0	0
Ovarian	WGS	Multivariate	SA505284	0.0756153	0.0265283	0.514923	0.160119	0	0.209973	0.0128407	0	0	0	0
Ovarian	WGS	Multivariate	SA505271	0.0546912	0.00883448	0.655474	0.226994	0	0.0327923	0.0212148	0	0	0	0
Ovarian	WGS	Multivariate	SA505258	0.0538231	0.022623	0.413268	0.102762	0	0.375084	0	0	0.0324397	0	0
Ovarian	WGS	Multivariate	SA505245	0.085841	0.0671655	0.250963	0.182951	0	0.35014	0.0629398	0	0	0	0
Ovarian	WGS	Multivariate	SA505950	0.154576	0.0116836	0.347785	0.317768	0	0.139322	0.0288646	0	0	0	0
Ovarian	WGS	Multivariate	SA505944	0.222356	0.00826625	0.318152	0.27285	0	0.167258	0.0111179	0	0	0	0
Ovarian	WGS	Multivariate	SA505918	0.177809	0.00508138	0.255388	0.289629	0	0.224313	0.0477803	0	0	0	0
Ovarian	WGS	Multivariate	SA505933	0.0860245	0.0122489	0.49205	0.122487	0	0.253233	0.0339574	0	0	0	0
Ovarian	WGS	Multivariate	SA505904	0.13624	0.0164516	0.427329	0.168339	0	0.217116	0.0345244	0	0	0	0
Ovarian	WGS	Multivariate	SA505919	0.0504274	0.00188399	0.590856	0.197037	0	0.12121	0.0385855	0	0	0	0
Ovarian	WGS	Multivariate	SA505930	0.0607282	0	0.606743	0.176987	0	0.118053	0.0374886	0	0	0	0
Ovarian	WGS	Multivariate	SA505897	0.118432	0.00869738	0.484102	0.326453	0	0.0107088	0.051607	0	0	0	0
Ovarian	WGS	Multivariate	SA505906	0.122113	0.00891846	0.529081	0.291572	0	0	0.048316	0	0	0	0
Ovarian	WGS	Multivariate	SA505885	0.22126	0.0452988	0.120368	0.404909	0	0.183243	0.0249216	0	0	0	0
Ovarian	WGS	Multivariate	SA505710	0.0537199	0.0280372	0.658911	0.157606	0	0.0812145	0.0205114	0	0	0	0
Ovarian	WGS	Multivariate	SA505702	0.0617395	0.0256904	0.504851	0.184225	0	0.170972	0.0525229	0	0	0	0
Ovarian	WGS	Multivariate	SA505723	0.0803857	0.0192744	0.719606	0.0841607	0	0.0796161	0.0169572	0	0	0	0
Ovarian	WGS	Multivariate	SA505730	0.0430364	0.000995233	0.620184	0.277338	0	0	0.0584468	0	0	0	0
Ovarian	WGS	Multivariate	SA505747	0.0664807	0.0103946	0.612754	0.201613	0	0.0582675	0.0504901	0	0	0	0
Ovarian	WGS	Multivariate	SA505654	0.056271	0.00564832	0.648433	0.135807	0	0.153841	0	0	0	0	0
Ovarian	WGS	Multivariate	SA505663	0.062036	0.0112164	0.687539	0.152212	0	0.0819456	0.00505113	0	0	0	0
Ovarian	WGS	Multivariate	SA505685	0.0906967	0.0203663	0.456732	0.254189	0	0.17593	0.0020864	0	0	0	0
Ovarian	WGS	Multivariate	SA505676	0.163519	0.0209232	0.325087	0.328815	0	0.135691	0.0259649	0	0	0	0
Ovarian	WGS	Multivariate	SA505762	0.0537669	0.0183436	0.538117	0.15788	0	0.221401	0.0104914	0	0	0	0
Ovarian	WGS	Multivariate	SA505750	0.0708865	0.0208741	0.496015	0.166715	0	0.226771	0.0187384	0	0	0	0
Ovarian	WGS	Multivariate	SA505620	0.0427835	0.0484173	0.449711	0.108104	0	0.293734	0.0572504	0	0	0	0
Ovarian	WGS	Multivariate	SA505613	0.070028	0.0126587	0.441606	0.112973	0	0.336871	0.025863	0	0	0	0
Ovarian	WGS	Multivariate	SA505577	0.162136	0.0240467	0.181266	0.488499	0	0.0836426	0.0604089	0	0	0	0
Ovarian	WGS	Multivariate	SA505600	0.0723505	0.0162815	0.614525	0.242983	0	0.0337863	0.0200741	0	0	0	0
Ovarian	WGS	Multivariate	SA505591	0.103702	0.0217609	0.595912	0.202771	0	0.044871	0.0309826	0	0	0	0
Ovarian	WGS	Multivariate	SA505551	0.16694	0.0203253	0.328411	0.381783	0	0.0591312	0.0434098	0	0	0	0
Ovarian	WGS	Multivariate	SA505563	0.182299	0.0151165	0.254787	0.449593	0	0.0570993	0.0411053	0	0	0	0
Ovarian	WGS	Multivariate	SA505633	0.11489	0.00871856	0.533636	0.197441	0	0.125988	0.0193261	0	0	0	0
Ovarian	WGS	Multivariate	SA505540	0.248699	0.0154174	0.425282	0.273803	0	0.0148901	0.0219096	0	0	0	0
Ovarian	WGS	Multivariate	SA505516	0.114186	0.0275139	0.350341	0.241198	0	0.228231	0.0385301	0	0	0	0
Ovarian	WGS	Multivariate	SA505529	0.216392	0.0236445	0.314081	0.285795	0	0.133629	0.0264588	0	0	0	0
Ovarian	WGS	Multivariate	SA505492	0.323441	0.0507277	0.0810266	0.367454	0	0.134462	0.0428888	0	0	0	0
Ovarian	WGS	Multivariate	SA505503	0.146229	0.0159786	0.443369	0.284482	0	0.0227414	0.0872002	0	0	0	0
Ovarian	WGS	Multivariate	SA505458	0.140814	0.058011	0.252539	0.221513	0	0.0756449	0.251477	0	0	0	0
Ovarian	WGS	Multivariate	SA505475	0.209728	0.0177333	0.258094	0.381102	0	0.101691	0.0316513	0	0	0	0
Ovarian	WGS	Multivariate	SA505416	0.0230793	0.0134952	0.553053	0.116726	0	0.276099	0.017547	0	0	0	0
Ovarian	WGS	Multivariate	SA505424	0.0218724	0.00826437	0.552601	0.177687	0	0.22593	0.0136453	0	0	0	0
Ovarian	WGS	Multivariate	SA505446	0.090497	0.0142151	0.541036	0.212065	0	0.142187	0	0	0	0	0
Ovarian	WGS	Multivariate	SA505437	0.0939684	0.0132002	0.497898	0.150769	0	0.244165	0	0	0	0	0
Ovarian	WGS	Multivariate	SA505404	0.101882	0.021083	0.38304	0.281125	0	0.168756	0.044114	0	0	0	0
Ovarian	WGS	Multivariate	SA505379	0.42287	0.036222	0.146629	0.283689	0	0	0.0456275	0	0.0649624	0	0
Ovarian	WGS	Multivariate	SA505389	0.23044	0.024872	0.19801	0.320211	0	0.20331	0.0231571	0	0	0	0
Ovarian	WGS	Multivariate	SA505328	0.114732	0.0110397	0.50264	0.143199	0	0.215997	0.0123928	0	0	0	0
Ovarian	WGS	Multivariate	SA505339	0.0715177	0.00604	0.407926	0.358866	0	0.127834	0.027816	0	0	0	0
Ovarian	WGS	Multivariate	SA505351	0.109482	0.0278455	0.468335	0.120118	0	0.253131	0.0210889	0	0	0	0
Ovarian	WGS	Multivariate	SA505363	0.297152	0.0490165	0.181301	0.401439	0	0.0468072	0.0242841	0	0	0	0
Ovarian	WGS	Multivariate	SA505316	0.0828005	0.0693266	0.211766	0.26908	0	0	0.367027	0	0	0	0
Ovarian	WGS	Multivariate	SA505282	0.173681	0.0558455	0.214799	0.377165	0	0.0925721	0.0859369	0	0	0	0
Ovarian	WGS	Multivariate	SA505297	0.0893108	0.0283308	0.562833	0.249167	0	0	0.050642	0	0.0197167	0	0
Ovarian	WGS	Multivariate	SA505303	0.0631039	0.0426428	0.528654	0.226509	0	0	0.120991	0	0.0180998	0	0
Ovarian	WGS	Multivariate	SA505244	0.0872256	0.0242921	0.480155	0.29829	0	0	0.0625718	0	0.0474659	0	0
Ovarian	WGS	Multivariate	SA505256	0.199743	0.0256754	0.179088	0.569926	0	0.0183202	0.00724732	0	0	0	0
Ovarian	WGS	Multivariate	SA505270	0.0790847	0.022713	0.331318	0.471717	0	0.0744002	0.0207667	0	0	0	0
Ovarian	WGS	Multivariate	SA505889	0.336979	0.00925479	0.12501	0.297983	0	0.209953	0.0208197	0	0	0	0
Ovarian	WGS	Multivariate	SA505863	0.0773185	0.0109733	0.550023	0.259883	0	0.0587938	0.0430079	0	0	0	0
Ovarian	WGS	Multivariate	SA505877	0.300479	0.0369958	0.0755445	0.344423	0	0.206086	0.036472	0	0	0	0
Ovarian	WGS	Multivariate	SA505808	0.0663271	0.0260775	0.498846	0.24408	0	0.127493	0.0371754	0	0	0	0
Ovarian	WGS	Multivariate	SA505821	0.0965833	0.0191245	0.51341	0.200429	0	0.154963	0.0154906	0	0	0	0
Ovarian	WGS	Multivariate	SA505780	0.12965	0.018747	0.19787	0.441089	0	0.194483	0.0181606	0	0	0	0
Ovarian	WGS	Multivariate	SA505795	0.277574	0.0379678	0.133588	0.360641	0	0.186805	0.00342436	0	0	0	0
Ovarian	WGS	Multivariate	SA505835	0.0896048	0.00926304	0.618778	0.168198	0	0.110565	0.00359079	0	0	0	0
Ovarian	WGS	Multivariate	SA505850	0.0562311	0.0106785	0.521431	0.259795	0	0.130587	0.0212768	0	0	0	0
Ovarian	WGS	Multivariate	SA519106	0.573424	0.0978785	0	0.256831	0	0	0	0	0.0718669	0	0
Ovarian	WGS	Multivariate	SA520043	0.533408	0.00693343	0.0317704	0.153243	0	0	0.126455	0	0.14819	0	0
Ovarian	WGS	Multivariate	SA518389	0.351604	0.017201	0.215663	0.0650349	0	0.315522	0.0349756	0	0	0	0
Ovarian	WGS	Multivariate	SA404138	0.902849	0	0.0844918	0	0	0	0.0126594	0	0	0	0
Ovarian	WGS	Multivariate	SA518379	0.859706	0	0	0	0	0	0.0172687	0	0.123025	0	0
Ovarian	WGS	Multivariate	SA519854	0.791697	0	0.173289	0.035014	0	0	0	0	0	0	0
Ovarian	WGS	Multivariate	SA518470	0.44416	0	0.211399	0.344442	0	0	0	0	0	0	0
Ovarian	WGS	Multivariate	SA518448	0.371601	0.023569	0.213976	0.308973	0	0.0818816	0	0	0	0	0
Ovarian	WGS	Multivariate	SA518462	0.503889	0.08785	0.208639	0.104714	0	0	0	0	0.094908	0	0
Ovarian	WGS	Multivariate	SA520082	0.417345	0.0365251	0.462873	0.0590868	0	0	0.0241705	0	0	0	0
Ovarian	WGS	Multivariate	SA518504	0.365616	0	0.596038	0	0	0	0.0210652	0	0.0172817	0	0
Ovarian	WGS	Multivariate	SA350650	0.205678	0	0.734717	0	0	0.0257233	0.0338821	0	0	0	0
Ovarian	WGS	Multivariate	SA520096	0.201587	0.0164062	0.775384	0.00662301	0	0	0	0	0	0	0
Ovarian	WGS	Multivariate	SA518485	0.546009	0	0.321231	0	0	0	0.0791187	0	0.0536417	0	0
Ovarian	WGS	Multivariate	SA518425	0.152325	0.0112635	0.240924	0.457797	0	0	0	0	0.137691	0	0
Ovarian	WGS	Multivariate	SA519499	0.50683	0.0204874	0.45753	0	0	0	0.0151529	0	0	0	0
Ovarian	WGS	Multivariate	SA520101	0.182523	0	0.504846	0	0	0.224987	0.0876444	0	0	0	0
Ovarian	WGS	Multivariate	SA520078	0.221075	0.126716	0.601241	0	0	0	0.0509681	0	0	0	0
Ovarian	WGS	Multivariate	SA520110	0.26147	0.0103871	0.64703	0	0	0	0.0811137	0	0	0	0
Ovarian	WGS	Multivariate	SA518887	0.348676	0.0150631	0.491615	0	0	0.144645	0	0	0	0	0
Ovarian	WGS	Multivariate	SA520105	0.0164816	0.051085	0.105711	0.673076	0	0.153646	0	0	0	0	0
Ovarian	WGS	Multivariate	SA519788	0.619991	0	0.322738	0.0572715	0	0	0	0	0	0	0
Ovarian	WGS	Multivariate	SA324608	0.355663	0	0	0.537092	0	0	0.010847	0	0.0963987	0	0
Ovarian	WGS	Multivariate	SA518547	0.288224	0	0.671261	0	0	0	0.0349384	0	0.00557654	0	0
Ovarian	WGS	Multivariate	SA518254	0.243223	0	0.260091	0.263923	0	0.132477	0	0	0.100286	0	0
Ovarian	WGS	Multivariate	SA520037	0.561468	0	0	0.310943	0	0	0.0188473	0	0.108742	0	0
Ovarian	WGS	Multivariate	SA520039	0.0865392	0	0.348283	0.397835	0	0	0	0	0.167343	0	0
Ovarian	WGS	Multivariate	SA519898	0.210489	0.263146	0.0889517	0.179096	0	0	0	0	0.258317	0	0
Ovarian	WGS	Multivariate	SA519932	0.986402	0.0135976	0	0	0	0	0	0	0	0	0
Ovarian	WGS	Multivariate	SA359572	0.36471	0	0.63529	0	0	0	0	0	0	0	0
Ovarian	WGS	Multivariate	SA518890	0.286966	0.0304983	0.459941	0	0	0	0.0190043	0	0.20359	0	0
Ovarian	WGS	Multivariate	SA518467	0.421818	0.0448114	0.399969	0	0	0	0.12759	0	0.00581048	0	0
Ovarian	WGS	Multivariate	SA520028	0.244167	0.0509385	0.698223	0	0	0	0	0	0.00667137	0	0
Ovarian	WGS	Multivariate	SA518893	0.609775	0.0831206	0.198796	0	0	0.0205226	0.080465	0	0.00732072	0	0
Ovarian	WGS	Multivariate	SA519904	0.286206	0.0435164	0.658388	0	0	0	0.0112858	0	0.000603968	0	0
Ovarian	WGS	Multivariate	SA518602	0.230795	0.0118163	0.433821	0.196143	0	0	0	0	0.127424	0	0
Ovarian	WGS	Multivariate	SA520122	0.343208	0	0.0580217	0.459464	0	0	0.139306	0	0	0	0
Ovarian	WGS	Multivariate	SA519317	0.174106	0.140047	0.579549	0.00524967	0	0	0	0	0.101049	0	0
Ovarian	WGS	Multivariate	SA520113	0.670899	0	0.261868	0	0	0	0.00531866	0	0.0619144	0	0
Ovarian	WGS	Multivariate	SA518483	0.232152	0	0.502737	0.0975089	0	0	0.0156247	0	0.151978	0	0
Ovarian	WGS	Multivariate	SA518989	0.694283	0.0405532	0	0	0	0.0117019	0.105823	0	0.147639	0	0

## Sheet: (C)Cervical-WGS-Mult.
Malignancy	Assay	Approach	Samples	SBS1_exp	SBS2_exp	SBS3_exp	SBS5_exp	SBS6_exp	SBS13_exp	SBS18_exp
Cervical	WGS	Multivariate	TCGA-C5-A2LT-01A-11D-A18J-09	0.300836	0	0.540373	0	0	0.0629879	0.0958028
Cervical	WGS	Multivariate	TCGA-C5-A1M9-01A-11D-A200-09	0.607931	0.311596	0	0	0	0.080473	0
Cervical	WGS	Multivariate	TCGA-EK-A2R9-01A-11D-A34H-09	0.884888	0.115112	0	0	0	0	0
Cervical	WGS	Multivariate	TCGA-DG-A2KJ-01A-11D-A18J-09	0.559	0.301052	0	0	0	0.118097	0.0218514
Cervical	WGS	Multivariate	TCGA-C5-A1ML-01A-11D-A200-09	0.35536	0.35588	0.0293693	0.0327671	0	0.212076	0.0145478
Cervical	WGS	Multivariate	TCGA-EK-A2RM-01A-21D-A18J-09	0.311446	0.376392	0.107424	0	0	0.204738	0
Cervical	WGS	Multivariate	TCGA-EK-A2RL-01A-11D-A34H-09	1	0	0	0	0	0	0
Cervical	WGS	Multivariate	TCGA-EK-A2RE-01A-11D-A34H-09	0.742364	0	0	0	0.257636	0	0
Cervical	WGS	Multivariate	TCGA-C5-A1M8-01A-21D-A200-09	0.635639	0.229623	0	0	0	0.0917695	0.0429685
Cervical	WGS	Multivariate	TCGA-C5-A1BF-01B-11D-A200-09	0.362427	0.133433	0	0	0	0.441329	0.0628117
Cervical	WGS	Multivariate	TCGA-C5-A2LV-01A-11D-A18J-09	0.747254	0.106732	0	0	0	0.146014	0
Cervical	WGS	Multivariate	TCGA-EK-A2PK-01A-11D-A18J-09	0.850716	0	0	0.049731	0	0.099553	0
Cervical	WGS	Multivariate	TCGA-C5-A0TN-01A-21D-A200-09	0.483596	0.266808	0	0	0	0.206725	0.0428709
Cervical	WGS	Multivariate	TCGA-C5-A1BN-01B-11D-A200-09	0.528559	0.0659606	0.0350685	0	0	0.370412	0
Cervical	WGS	Multivariate	TCGA-EX-A1H5-01A-31D-A34H-09	0.921947	0.0780532	0	0	0	0	0
Cervical	WGS	Multivariate	TCGA-C5-A1MI-01A-11D-A200-09	0.632807	0.147881	0	0	0	0.202717	0.0165942
Cervical	WGS	Multivariate	TCGA-DS-A0VL-01A-21D-A200-09	0.347654	0.330348	0	0	0	0.321998	0
Cervical	WGS	Multivariate	TCGA-C5-A2LY-01A-31D-A18J-09	0.426164	0.264275	0	0	0	0.305145	0.00441634
Cervical	WGS	Multivariate	TCGA-C5-A1BJ-01A-11D-A200-09	0.290028	0.303818	0	0	0	0.406154	0
Cervical	WGS	Multivariate	TCGA-C5-A1MQ-01A-11D-A200-09	0.302124	0.33952	0.28542	0	0	0.0379848	0.0349512

## Sheet: (D)UCEC-WES-Mult.
Malignancy	Assay	Approach	Samples	SBS1_exp	SBS2_exp	SBS3_exp	SBS5_exp	SBS6_exp	SBS8_exp	SBS10_exp	SBS13_exp	SBS14_exp	SBS15_exp	SBS18_exp	SBS20_exp	SBS21_exp	SBS26_exp
UCEC	WES	Multivariate	SA552458	0.273371	0.00977239	0	0.664082	0	0	0	0.0527754	0	0	0	0	0	0
UCEC	WES	Multivariate	SA552448	0.61748	0	0	0.0390424	0	0.294407	0	0.00774433	0	0	0.0413258	0	0	0
UCEC	WES	Multivariate	SA552428	0.215743	0	0	0.436691	0	0	0	0.159091	0	0	0.188476	0	0	0
UCEC	WES	Multivariate	SA552418	0.11429	0.0614077	0.215725	0.548341	0	0.0602361	0	0	0	0	0	0	0	0
UCEC	WES	Multivariate	SA552498	0.33387	0	0	0.151915	0	0	0	0	0.0860776	0.197185	0	0.230953	0	0
UCEC	WES	Multivariate	SA552488	0.0937842	0.0476848	0	0.858531	0	0	0	0	0	0	0	0	0	0
UCEC	WES	Multivariate	SA552478	0.434544	0.0620731	0	0.503383	0	0	0	0	0	0	0	0	0	0
UCEC	WES	Multivariate	SA552468	0.473813	0	0	0	0.0103576	0	0	0	0.0566049	0.197944	0	0.261281	0	0
UCEC	WES	Multivariate	SA552408	0.468434	0.125024	0.221843	0	0	0	0	0.079334	0	0	0.105365	0	0	0
UCEC	WES	Multivariate	SA552398	0.776719	0	0.195912	0.0201894	0	0	0	0.00718004	0	0	0	0	0	0
UCEC	WES	Multivariate	SA552388	0.121456	0.0571217	0.239225	0.45459	0	0	0	0	0	0	0.127607	0	0	0
UCEC	WES	Multivariate	SA552313	0	0	0.0612751	0.0263933	0	0	0.731731	0	0	0.0179596	0.162641	0	0	0
UCEC	WES	Multivariate	SA552301	0.21928	0.048178	0	0.464398	0	0	0	0.0851876	0	0	0.182956	0	0	0
UCEC	WES	Multivariate	SA552380	0.434667	0	0	0.485773	0	0	0	0.0751492	0	0	0.00441077	0	0	0
UCEC	WES	Multivariate	SA552365	0.580927	0.0395891	0.102659	0.108769	0	0	0	0	0	0	0.168056	0	0	0
UCEC	WES	Multivariate	SA552355	0	0	0.0413044	0	0	0.115967	0	0	0.301939	0	0	0.54079	0	0
UCEC	WES	Multivariate	SA552345	0	0	0.0900144	0	0	0.0342293	0.586118	0	0.0228372	0	0.266801	0	0	0
UCEC	WES	Multivariate	SA552284	0.176742	0.342176	0.106613	0.255498	0	0	0	0.118971	0	0	0	0	0	0
UCEC	WES	Multivariate	SA552539	0.334935	0.0222245	0	0.588688	0	0	0	0	0	0	0.0541524	0	0	0
UCEC	WES	Multivariate	SA552508	0.0911628	0.00624259	0.314929	0.514523	0	0	0	0.0731425	0	0	0	0	0	0
UCEC	WES	Multivariate	SA552321	0.165171	0	0	0.170133	0.337511	0	0	0	0	0	0	0.233747	0.0934383	0
UCEC	WES	Multivariate	SA552283	0.808394	0	0	0.0617254	0	0	0	0.0550502	0	0	0.0748306	0	0	0
UCEC	WES	Multivariate	SA552270	0.191972	0.047567	0	0.5143	0	0.0822591	0	0	0	0	0.163902	0	0	0
UCEC	WES	Multivariate	SA552262	0.283814	0.0335371	0.659597	0	0	0	0	0.023052	0	0	0	0	0	0
UCEC	WES	Multivariate	SA514442	0.190396	0	0.22426	0.218714	0	0.213968	0	0	0	0	0.152663	0	0	0
UCEC	WES	Multivariate	SA514459	0.0811538	0	0	0.42065	0.273775	0	0	0	0	0.134652	0	0	0	0.0897693
UCEC	WES	Multivariate	SA514253	0.396311	0	0.400353	0.0534709	0	0	0	0.149865	0	0	0	0	0	0
UCEC	WES	Multivariate	SA514177	0.338749	0.0338135	0.480718	0	0	0	0	0.023764	0	0	0.122955	0	0	0
UCEC	WES	Multivariate	SA514396	0.350628	0.0624518	0.365562	0	0	0.129224	0	0.0921347	0	0	0	0	0	0
UCEC	WES	Multivariate	SA514239	0.1997	0.0205701	0.349626	0	0	0.430104	0	0	0	0	0	0	0	0
UCEC	WES	Multivariate	SA514194	0.124217	0	0	0	0	0	0.0134547	0	0	0.242634	0	0.57628	0.0434148	0
UCEC	WES	Multivariate	SA514428	0.55461	0.0822345	0.187102	0.0168748	0	0	0	0	0	0	0.159179	0	0	0
UCEC	WES	Multivariate	SA514407	0.366421	0.00543888	0.0519619	0.467811	0	0.108367	0	0	0	0	0	0	0	0
UCEC	WES	Multivariate	SA514322	0.288687	0.112051	0.19456	0.291686	0	0	0	0	0	0	0.113017	0	0	0
UCEC	WES	Multivariate	SA514264	0.168836	0.162089	0.450071	0.181575	0	0	0	0.0374289	0	0	0	0	0	0
UCEC	WES	Multivariate	SA514206	0.247554	0	0.119837	0.284208	0	0	0	0.252598	0	0	0.0958023	0	0	0
UCEC	WES	Multivariate	SA514306	0.131503	0	0	0	0	0.156411	0	0	0	0.2444	0	0.319411	0	0.148275
UCEC	WES	Multivariate	SA514283	0.26582	0.0501637	0.0783801	0.605636	0	0	0	0	0	0	0	0	0	0
UCEC	WES	Multivariate	SA514365	0.992451	0	0	0	0	0	0	0	0	0	0	0.00754946	0	0
UCEC	WES	Multivariate	SA514333	0.413895	0	0	0.0917757	0	0	0	0	0	0.186183	0	0.229193	0	0.0789529
UCEC	WES	Multivariate	SA514217	0.149459	0	0	0	0.204941	0.152578	0.0475483	0	0	0	0	0.445473	0	0
UCEC	WES	Multivariate	SA460564	0.304468	0.160531	0.268945	0	0	0.12343	0	0.142626	0	0	0	0	0	0
UCEC	WES	Multivariate	SA460780	0.685038	0	0	0.236465	0	0	0	0.0784966	0	0	0	0	0	0
UCEC	WES	Multivariate	SA460291	0.269926	0.105673	0	0.624401	0	0	0	0	0	0	0	0	0	0
UCEC	WES	Multivariate	SA460459	0.715379	0.0177007	0	0.26692	0	0	0	0	0	0	0	0	0	0
UCEC	WES	Multivariate	SA460372	0.187696	0	0	0.097653	0	0	0	0	0	0.181099	0	0.487655	0.0458963	0
UCEC	WES	Multivariate	SA460195	0.289389	0	0.103624	0	0	0	0	0	0.0305719	0.233683	0	0.342731	0	0
UCEC	WES	Multivariate	SA459945	0.563948	0	0.140762	0.144184	0	0	0	0.130594	0	0	0.0205111	0	0	0
UCEC	WES	Multivariate	SA459882	0.336625	0.0945543	0	0.557658	0	0	0	0	0	0	0.0111629	0	0	0
UCEC	WES	Multivariate	SA460089	0.781101	0	0.0130763	0	0	0.111315	0	0.0945071	0	0	0	0	0	0
UCEC	WES	Multivariate	SA459721	0.248339	0.0204644	0	0.263831	0	0	0	0	0.163237	0	0	0.304129	0	0
UCEC	WES	Multivariate	SA459194	0.445678	0	0	0	0.0241309	0	0	0	0.207276	0	0	0.321713	0.00120241	0
UCEC	WES	Multivariate	SA459282	0.45274	0.0758016	0.112651	0.231003	0	0	0	0	0	0	0.127805	0	0	0
UCEC	WES	Multivariate	SA459122	0.0569573	0.238002	0.0302727	0.0260676	0	0	0	0.6487	0	0	0	0	0	0
UCEC	WES	Multivariate	SA459493	0.174423	0.198475	0	0.618534	0	0	0	0.00856777	0	0	0	0	0	0
UCEC	WES	Multivariate	SA459377	0.25301	0.0376583	0	0.142041	0.260339	0	0	0	0	0	0	0.306951	0	0
UCEC	WES	Multivariate	SA462261	0.794169	0.0489123	0.000919498	0	0	0	0	0	0	0	0.155999	0	0	0
UCEC	WES	Multivariate	SA462048	0	0	0	0	0	0.00615658	0.725565	0.0051588	0	0	0.26312	0	0	0
UCEC	WES	Multivariate	SA462169	0.621201	0	0	0	0.336025	0	0	0	0	0	0	0	0	0.0427741
UCEC	WES	Multivariate	SA461725	0.153602	0.15116	0	0.609268	0	0	0	0	0	0	0.0859699	0	0	0
UCEC	WES	Multivariate	SA461825	0.412418	0.0826186	0	0.382256	0	0	0	0.0844515	0	0	0.0382563	0	0	0
UCEC	WES	Multivariate	SA461920	0.21799	0	0	0.0635187	0	0	0	0	0.0386682	0.170571	0	0.509252	0	0
UCEC	WES	Multivariate	SA461461	0.23106	0	0	0.76894	0	0	0	0	0	0	0	0	0	0
UCEC	WES	Multivariate	SA461621	0.771936	0.0636806	0.0523241	0.0479657	0	0	0	0	0	0	0.0640938	0	0	0
UCEC	WES	Multivariate	SA461178	0	0	0	0.192298	0	0	0.140561	0	0.0612713	0.275508	0	0.330361	0	0
UCEC	WES	Multivariate	SA461293	0	0	0	0.139377	0	0	0	0	0	0.0208521	0	0	0	0.839771
UCEC	WES	Multivariate	SA461378	0.0856594	0.0733056	0	0.485682	0	0.0923361	0	0.263017	0	0	0	0	0	0
UCEC	WES	Multivariate	SA460867	0.311532	0.203564	0.470844	0.0140593	0	0	0	0	0	0	0	0	0	0
UCEC	WES	Multivariate	SA460952	0.264668	0	0	0.21691	0	0	0.0162794	0	0	0.156464	0	0.345679	0	0
UCEC	WES	Multivariate	SA461046	0.480902	0.0528511	0	0.202803	0	0	0	0.0645209	0	0	0.198923	0	0	0
UCEC	WES	Multivariate	SA526120	0	0	0	0	0	0.0274948	0.690449	0.00443655	0	0	0.27762	0	0	0
UCEC	WES	Multivariate	SA526095	0	0	0.00900694	0	0	0.0515606	0.715237	0.00584546	0	0	0.218351	0	0	0
UCEC	WES	Multivariate	SA526102	0.76896	0.0631162	0	0	0	0.166588	0	0	0	0	0.00133602	0	0	0
UCEC	WES	Multivariate	SA526244	0.775687	0	0	0	0.0822231	0	0	0	0.035329	0	0	0.103808	0	0.00295313
UCEC	WES	Multivariate	SA526254	0.443312	0	0.475017	0.019745	0	0	0	0.0619253	0	0	0	0	0	0
UCEC	WES	Multivariate	SA526088	0.598483	0	0.169072	0.193779	0	0	0	0	0	0	0.0386661	0	0	0
UCEC	WES	Multivariate	SA519177	0	0	0	0	0	0	0.805946	0.00881124	0	0	0.185243	0	0	0
UCEC	WES	Multivariate	SA520062	0.600276	0.0676413	0.119289	0.195336	0	0	0	0	0	0	0.0174576	0	0	0
UCEC	WES	Multivariate	SA526264	0.225512	0	0	0.277526	0	0	0	0.0742748	0	0	0.422687	0	0	0
UCEC	WES	Multivariate	SA526276	0.231087	0	0	0.26936	0.386627	0	0	0	0.0619916	0	0	0.0509344	0	0
UCEC	WES	Multivariate	SA463559	0.428676	0.0546555	0	0.233017	0	0.196474	0	0.0871784	0	0	0	0	0	0
UCEC	WES	Multivariate	SA463251	0.204816	0.181759	0	0.406244	0	0	0	0.0825694	0	0	0.124611	0	0	0
UCEC	WES	Multivariate	SA463409	0.0603492	0.139139	0.0196509	0.615417	0	0	0	0.165443	0	0	0	0	0	0
UCEC	WES	Multivariate	SA463034	0.394764	0.0639019	0	0.352449	0	0.1683	0	0.0205848	0	0	0	0	0	0
UCEC	WES	Multivariate	SA463162	0.519177	0.019116	0	0.453229	0	0	0	0.00847825	0	0	0	0	0	0
UCEC	WES	Multivariate	SA462909	0.232254	0	0	0.196009	0	0	0	0	0	0.143112	0	0.342024	0	0.0866021
UCEC	WES	Multivariate	SA462821	0.362825	0	0	0.270711	0	0	0	0	0.159865	0	0	0.0864911	0	0.120109
UCEC	WES	Multivariate	SA462716	0.37523	0.0799866	0.0900676	0.365498	0	0	0	0.0892178	0	0	0	0	0	0
UCEC	WES	Multivariate	SA462549	0	0.0612446	0	0.323882	0.122845	0	0.163879	0	0	0	0	0	0	0.32815
UCEC	WES	Multivariate	SA462412	0.490482	0	0	0	0.253421	0	0	0	0.0899654	0	0	0.15775	0	0.00838116
UCEC	WES	Multivariate	SA464380	0.661981	0.114102	0	0.068009	0	0	0	0.12841	0	0	0.0274988	0	0	0
UCEC	WES	Multivariate	SA464500	0.620528	0	0	0	0.145544	0	0	0	0.0606996	0	0	0.136248	0.0369798	0
UCEC	WES	Multivariate	SA464279	0.226562	0.251632	0.360635	0	0	0	0	0.0903429	0	0	0.0708278	0	0	0
UCEC	WES	Multivariate	SA464060	0.807542	0	0.0656727	0	0	0.126786	0	0	0	0	0	0	0	0
UCEC	WES	Multivariate	SA464169	0.669941	0	0	0	0.233148	0	0	0	0.00763871	0	0	0.0892729	0	0
UCEC	WES	Multivariate	SA463709	0.409934	0.135237	0.205051	0.249778	0	0	0	0	0	0	0	0	0	0
UCEC	WES	Multivariate	SA463899	0.309751	0.199106	0	0.35927	0	0	0	0	0	0	0.131874	0	0	0
UCEC	WES	Multivariate	SA486998	0.322633	0.00178188	0.542258	0	0	0	0	0.105024	0	0	0.0283019	0	0	0
UCEC	WES	Multivariate	SA486869	0.0695763	0	0	0.683332	0	0.186234	0	0.0482099	0	0	0.0126476	0	0	0
UCEC	WES	Multivariate	SA486738	0.496729	0.00419824	0.014775	0.369865	0	0	0	0	0	0	0.114432	0	0	0
UCEC	WES	Multivariate	SA488886	0.155233	0	0	0.165163	0	0	0.0337851	0	0	0.252258	0	0.393561	0	0
UCEC	WES	Multivariate	SA488776	0.436776	0.0537812	0.321904	0.187539	0	0	0	0	0	0	0	0	0	0
UCEC	WES	Multivariate	SA477268	0.6236	0.0535509	0.0623278	0	0	0.157239	0	0	0	0	0.103283	0	0	0
UCEC	WES	Multivariate	SA477133	0.194404	0	0	0	0	0	0	0	0.12603	0.128755	0	0.391155	0	0.159656
UCEC	WES	Multivariate	SA476863	0.654525	0.0342213	0	0.303313	0	0	0	0	0	0	0.00794109	0	0	0
UCEC	WES	Multivariate	SA488687	0.220333	0	0	0	0	0	0	0	0.0516134	0.23568	0	0.443808	0	0.0485655
UCEC	WES	Multivariate	SA488556	0.25093	0	0	0.585275	0	0.0382629	0	0.0984701	0	0	0.0270626	0	0	0
UCEC	WES	Multivariate	SA488397	0.867539	0	0	0	0	0.110185	0	0.0222763	0	0	0	0	0	0
UCEC	WES	Multivariate	SA478102	0.271585	0.196709	0.33283	0	0	0	0	0.0431217	0	0	0.155754	0	0	0
UCEC	WES	Multivariate	SA478007	0.219943	0.174719	0	0.145275	0	0	0	0.361706	0	0	0.0983562	0	0	0
UCEC	WES	Multivariate	SA488116	0.638981	0.088311	0	0.129844	0	0	0	0.0419811	0	0	0.100883	0	0	0
UCEC	WES	Multivariate	SA477902	0.507559	0.0237361	0	0.468705	0	0	0	0	0	0	0	0	0	0
UCEC	WES	Multivariate	SA477788	0	0.0283037	0.53037	0.374446	0	0	0	0.0658333	0	0	0.00104764	0	0	0
UCEC	WES	Multivariate	SA487947	0.318063	0.0833427	0.175857	0.275868	0	0	0	0.146868	0	0	0	0	0	0
UCEC	WES	Multivariate	SA487874	0	0	0	0.166597	0	0	0.604998	0	0	0.0568717	0.056459	0	0	0.115074
UCEC	WES	Multivariate	SA477703	0.303578	0.0548339	0	0.498251	0	0	0	0.143338	0	0	0	0	0	0
UCEC	WES	Multivariate	SA487714	0.659808	0.0131533	0	0.279719	0	0.0293564	0	0.0179628	0	0	0	0	0	0
UCEC	WES	Multivariate	SA477613	0.287191	0.0157198	0.393274	0.303816	0	0	0	0	0	0	0	0	0	0
UCEC	WES	Multivariate	SA487563	0.0707584	0.00348403	0	0.206827	0.469274	0	0	0	0	0	0	0.249656	0	0
UCEC	WES	Multivariate	SA477514	0.339459	0.0204818	0	0.49984	0	0	0	0.0470622	0	0	0.0931563	0	0	0
UCEC	WES	Multivariate	SA477383	0	0	0.162815	0	0	0	0	0	0.0774175	0	0	0.495366	0	0.264401
UCEC	WES	Multivariate	SA487423	0	0	0	0	0	0	0	0	0	0.0573593	0	0.225987	0.145424	0.57123
UCEC	WES	Multivariate	SA487298	0.371858	0.0218065	0	0	0	0	0	0	0	0.208334	0	0.32254	0	0.0754622
UCEC	WES	Multivariate	SA487138	0.73012	0	0.0245983	0.14155	0	0	0	0	0	0	0.103731	0	0	0
UCEC	WES	Multivariate	SA486739	0.173169	0	0	0.72329	0	0	0	0.10354	0	0	0	0	0	0
UCEC	WES	Multivariate	SA486627	0.362112	0.0161336	0.354425	0	0	0	0	0.087487	0	0	0.179843	0	0	0
UCEC	WES	Multivariate	SA476744	0.258664	0.0103308	0	0.523183	0	0	0	0.0682834	0	0	0.139538	0	0	0
UCEC	WES	Multivariate	SA475318	0.157316	0	0	0	0	0	0.446077	0	0.308617	0.030695	0	0	0	0.0572955
UCEC	WES	Multivariate	SA486497	0.443472	0.0878945	0	0.346743	0	0	0	0	0	0	0.121891	0	0	0
UCEC	WES	Multivariate	SA476624	0.649514	0	0.17357	0	0	0.161758	0	0.0151582	0	0	0	0	0	0
UCEC	WES	Multivariate	SA476481	0.315866	0.118137	0	0	0	0.565997	0	0	0	0	0	0	0	0
UCEC	WES	Multivariate	SA486377	0.738635	0.0243752	0.16893	0	0	0.0171556	0	0	0	0	0.0509038	0	0	0
UCEC	WES	Multivariate	SA476321	0.4053	0	0	0.331451	0	0	0	0	0	0.108468	0	0	0.154781	0
UCEC	WES	Multivariate	SA486292	0.112269	0	0.0667713	0.726583	0	0.00695483	0	0.0874215	0	0	0	0	0	0
UCEC	WES	Multivariate	SA486193	0	0	0.0841928	0.0946992	0	0	0	0	0	0.169315	0	0.651793	0	0
UCEC	WES	Multivariate	SA476203	0.152188	0.078424	0	0.514774	0	0	0	0	0	0	0	0.231506	0.0231072	0
UCEC	WES	Multivariate	SA486056	0.177023	0	0.514582	0.149676	0	0	0	0.0748842	0	0	0.0838341	0	0	0
UCEC	WES	Multivariate	SA485956	0	0.00913844	0.0678246	0	0	0	0	0	0	0.0240376	0	0	0.438052	0.460947
UCEC	WES	Multivariate	SA476088	0.530577	0.0367413	0	0.427465	0	0	0	0	0	0	0.00521674	0	0	0
UCEC	WES	Multivariate	SA475981	0.696044	0	0.0511501	0.24572	0	0	0	0	0	0	0.00708528	0	0	0
UCEC	WES	Multivariate	SA485839	0.738619	0.0156418	0.143597	0	0	0.0613108	0	0	0	0	0.0408317	0	0	0
UCEC	WES	Multivariate	SA475881	0.233529	0.178527	0.359737	0.178885	0	0	0	0.049323	0	0	0	0	0	0
UCEC	WES	Multivariate	SA475761	0.455401	0	0.0237814	0.454114	0	0.0667035	0	0	0	0	0	0	0	0
UCEC	WES	Multivariate	SA475632	0.44224	0	0.15936	0.0707104	0	0	0	0.286284	0	0	0.041406	0	0	0
UCEC	WES	Multivariate	SA475491	0.399171	0.028857	0.0996789	0.354889	0	0	0	0.117404	0	0	0	0	0	0
UCEC	WES	Multivariate	SA466649	0.410582	0	0.536325	0	0	0.0114913	0	0	0	0	0.0416017	0	0	0
UCEC	WES	Multivariate	SA481762	0.472571	0.147061	0.143089	0.203919	0	0	0	0.0333592	0	0	0	0	0	0
UCEC	WES	Multivariate	SA464624	0.747618	0	0	0.20738	0	0	0	0	0	0	0.0450014	0	0	0
UCEC	WES	Multivariate	SA459669	0	0	0	0.225295	0.149749	0	0	0	0	0.237462	0	0.327372	0.0601213	0
UCEC	WES	Multivariate	SA481027	0.501105	0.0106308	0	0.488264	0	0	0	0	0	0	0	0	0	0
UCEC	WES	Multivariate	SA464744	0.216134	0	0	0	0	0	0	0	0.0915689	0.153909	0	0.419157	0	0.119231
UCEC	WES	Multivariate	SA459497	0	0	0	0.200296	0.2329	0	0	0	0.111234	0.0756042	0	0.379966	0	0
UCEC	WES	Multivariate	SA480889	0.0931294	0.177909	0.470089	0	0	0	0	0.258872	0	0	0	0	0	0
UCEC	WES	Multivariate	SA480705	0.541031	0	0	0.0736177	0	0.360614	0	0	0	0	0.024738	0	0	0
UCEC	WES	Multivariate	SA459578	0.1393	0	0	0.193827	0	0	0	0	0	0.171582	0	0.446671	0.0486212	0
UCEC	WES	Multivariate	SA459413	0.131448	0	0	0	0	0.126455	0.233179	0	0.456701	0.0522167	0	0	0	0
UCEC	WES	Multivariate	SA480594	0.582385	0.157291	0	0	0	0.125164	0	0.016239	0	0	0.118921	0	0	0
UCEC	WES	Multivariate	SA459297	0.190792	0	0	0	0	0.248629	0	0	0	0.153403	0	0.259144	0	0.148032
UCEC	WES	Multivariate	SA480454	0.332668	0	0	0	0.244323	0	0	0	0.0990615	0	0	0.232345	0	0.0916022
UCEC	WES	Multivariate	SA480264	0.146614	0	0	0	0.30517	0	0	0	0	0.201194	0	0.280195	0	0.0668262
UCEC	WES	Multivariate	SA480023	0.109116	0.174531	0.325512	0	0	0	0	0.334694	0	0	0.0561475	0	0	0
UCEC	WES	Multivariate	SA480144	0.533039	0.0559666	0	0.410994	0	0	0	0	0	0	0	0	0	0
UCEC	WES	Multivariate	SA479908	0.986434	0	0	0	0	0	0	0	0	0.0135655	0	0	0	0
UCEC	WES	Multivariate	SA466179	0.388469	0.0169539	0.294544	0	0	0.231145	0	0	0	0	0.0688878	0	0	0
UCEC	WES	Multivariate	SA466362	0.400312	0	0	0.574837	0	0	0	0.0175283	0	0	0.00732223	0	0	0
UCEC	WES	Multivariate	SA465987	0.537959	0.0983837	0	0.133905	0	0.229752	0	0	0	0	0	0	0	0
UCEC	WES	Multivariate	SA465877	0.447086	0	0.222677	0.312824	0	0	0	0.017413	0	0	0	0	0	0
UCEC	WES	Multivariate	SA460411	0.323785	0	0	0.582267	0	0.0119104	0	0.0326367	0	0	0.0494013	0	0	0
UCEC	WES	Multivariate	SA465751	0	0.0343572	0	0	0.588378	0	0.0466255	0	0	0	0	0.135443	0	0.195196
UCEC	WES	Multivariate	SA465515	0.133182	0.0795533	0.566192	0.156448	0	0	0	0.064625	0	0	0	0	0	0
UCEC	WES	Multivariate	SA460307	0.420074	0	0	0	0.0489717	0	0	0	0	0.0294438	0	0.232529	0	0.268982
UCEC	WES	Multivariate	SA465395	0.283351	0.129023	0	0.559336	0	0	0	0.0195958	0	0	0.00869337	0	0	0
UCEC	WES	Multivariate	SA460220	0.253741	0.0630415	0	0.561656	0	0	0	0	0	0	0.121562	0	0	0
UCEC	WES	Multivariate	SA481578	0.268266	0.0265506	0	0	0	0	0.052849	0	0	0.244499	0	0.407836	0	0
UCEC	WES	Multivariate	SA460129	0.284902	0	0	0.102088	0	0	0	0.0121819	0	0.258244	0	0.342584	0	0
UCEC	WES	Multivariate	SA465294	0.497769	0.133836	0	0.217646	0	0.150749	0	0	0	0	0	0	0	0
UCEC	WES	Multivariate	SA481478	0.0442417	0.21669	0	0.131324	0	0	0	0.607745	0	0	0	0	0	0
UCEC	WES	Multivariate	SA460010	0.425457	0.0674496	0	0.418312	0	0	0	0	0	0	0.088782	0	0	0
UCEC	WES	Multivariate	SA465074	0.623612	0	0.176086	0.0627133	0	0.0332093	0	0	0	0	0.104379	0	0	0
UCEC	WES	Multivariate	SA464955	0	0	0	0.102353	0	0.0270019	0.670786	0	0.0981134	0	0.101746	0	0	0
UCEC	WES	Multivariate	SA459857	0.502034	0.131381	0	0	0	0.138254	0	0.168204	0	0	0.0601281	0	0	0
UCEC	WES	Multivariate	SA481300	0	0	0	0	0	0	0.723042	0.00604269	0	0	0.270916	0	0	0
UCEC	WES	Multivariate	SA459754	0.323445	0	0	0.114869	0.248145	0	0	0	0.0634674	0	0	0.250075	0	0
UCEC	WES	Multivariate	SA464845	0.266932	0	0	0.0898871	0.148889	0	0	0	0	0.218901	0	0.275391	0	0
UCEC	WES	Multivariate	SA481141	0.391061	0.0149844	0.474077	0	0	0	0	0.064763	0	0	0.0551153	0	0	0
UCEC	WES	Multivariate	SA489370	0.789125	0	0.140067	0	0	0.0708072	0	0	0	0	0	0	0	0
UCEC	WES	Multivariate	SA479097	0.52153	0.110469	0.276186	0	0	0	0	0.0118731	0	0	0.0799417	0	0	0
UCEC	WES	Multivariate	SA489056	0	0	0	0.169093	0	0	0	0	0.15626	0	0	0.116938	0.229197	0.328512
UCEC	WES	Multivariate	SA478838	0.283504	0	0	0.19782	0.325578	0	0	0	0.0786422	0	0	0.114456	0	0
UCEC	WES	Multivariate	SA489209	0.711834	0.0745259	0	0	0	0.0811618	0	0.00520044	0	0	0.127278	0	0	0
UCEC	WES	Multivariate	SA478932	0.163096	0.18655	0.633819	0.0165346	0	0	0	0	0	0	0	0	0	0
UCEC	WES	Multivariate	SA478622	0.535111	0.0275053	0	0.437383	0	0	0	0	0	0	0	0	0	0
UCEC	WES	Multivariate	SA478484	0	0	0	0.121368	0.0992028	0	0	0	0	0.0365618	0	0	0	0.742867
UCEC	WES	Multivariate	SA478344	0	0.071805	0	0.391916	0.111442	0	0	0	0	0.18099	0	0.243847	0	0
UCEC	WES	Multivariate	SA564073	0.169146	0.0549851	0	0.456775	0	0	0	0.268399	0	0	0.0506953	0	0	0
UCEC	WES	Multivariate	SA459153	0.217781	0.0797908	0	0.56694	0	0	0.0351424	0	0	0	0	0.100345	0	0
UCEC	WES	Multivariate	SA563978	0.171791	0.589031	0.069822	0	0	0	0	0.167387	0	0	0.00196849	0	0	0
UCEC	WES	Multivariate	SA564112	0.293703	0	0.48163	0.184574	0	0	0	0.0400935	0	0	0	0	0	0
UCEC	WES	Multivariate	SA564101	0.0241259	0	0.376229	0.457555	0	0.0452024	0	0.0968881	0	0	0	0	0	0
UCEC	WES	Multivariate	SA490563	0.592535	0.00942965	0	0.361881	0	0	0	0.0234158	0	0	0.0127393	0	0	0
UCEC	WES	Multivariate	SA564091	0	0	0.0816728	0	0	0.0852878	0	0	0.243387	0	0	0.589653	0	0
UCEC	WES	Multivariate	SA564083	0.310904	0.179063	0	0.408133	0	0	0	0.0180184	0	0	0.0838808	0	0	0
UCEC	WES	Multivariate	SA490432	0.170762	0	0	0	0	0	0.0335154	0	0.612512	0.0919079	0	0	0.0913032	0
UCEC	WES	Multivariate	SA564131	0.366056	0.0291754	0.434814	0	0	0.124434	0	0.0455207	0	0	0	0	0	0
UCEC	WES	Multivariate	SA564121	0	0.0231991	0	0.158974	0	0	0.185242	0	0.474839	0	0	0.157747	0	0
UCEC	WES	Multivariate	SA490323	0.269073	0.170322	0	0.470172	0	0	0	0	0	0	0.0904327	0	0	0
UCEC	WES	Multivariate	SA479820	0.139099	0.144935	0.161665	0.519471	0	0	0	0.03483	0	0	0	0	0	0
UCEC	WES	Multivariate	SA490222	0.715523	0.0401302	0.218021	0.0263257	0	0	0	0	0	0	0	0	0	0
UCEC	WES	Multivariate	SA490082	0	0	0	0	0	0	0	0	0	0	0	0.00819926	0	0.991801
UCEC	WES	Multivariate	SA479725	0.63538	0.0595743	0.0122308	0.268721	0	0	0	0.0240941	0	0	0	0	0	0
UCEC	WES	Multivariate	SA489905	0.648974	0.112109	0	0.0722126	0	0	0	0	0	0	0.166704	0	0	0
UCEC	WES	Multivariate	SA479614	0	0	0.0145543	0	0	0.0782359	0.731411	0.00350526	0	0	0.172294	0	0	0
UCEC	WES	Multivariate	SA479485	0.640971	0.00583683	0	0.330431	0	0	0	0	0	0	0.0227606	0	0	0
UCEC	WES	Multivariate	SA489774	0.35779	0.0369607	0.256794	0.131976	0	0	0	0.216479	0	0	0	0	0	0
UCEC	WES	Multivariate	SA489650	0.308176	0	0.559941	0	0	0	0	0.011191	0	0	0.120692	0	0	0
UCEC	WES	Multivariate	SA479374	0.649048	0.0624581	0	0	0	0.288494	0	0	0	0	0	0	0	0
UCEC	WES	Multivariate	SA479246	0.677288	0.00593913	0	0.316773	0	0	0	0	0	0	0	0	0	0
UCEC	WES	Multivariate	SA489499	0.243674	0	0.0673245	0.689001	0	0	0	0	0	0	0	0	0	0
UCEC	WES	Multivariate	SA472047	0.916968	0	0	0	0.0511624	0	0	0	0	0	0	0.00461589	0	0.027254
UCEC	WES	Multivariate	SA471820	0	0	0.600864	0.284298	0	0	0	0.114838	0	0	0	0	0	0
UCEC	WES	Multivariate	SA471938	0.200144	0	0	0	0	0	0.0174403	0	0	0.12769	0	0.372371	0	0.282354
UCEC	WES	Multivariate	SA471720	0.451668	0.180633	0.160942	0.165808	0	0	0	0.0409495	0	0	0	0	0	0
UCEC	WES	Multivariate	SA471572	0.162611	0	0	0	0	0	0	0	0.190728	0.0819242	0	0.341137	0	0.2236
UCEC	WES	Multivariate	SA471423	0.462437	0	0	0	0	0	0	0.0119652	0.172668	0	0	0.218767	0	0.134163
UCEC	WES	Multivariate	SA471233	0.508032	0.139556	0	0.297614	0	0	0	0	0	0	0.0547985	0	0	0
UCEC	WES	Multivariate	SA471113	0.174831	0	0	0.171606	0	0	0.0271515	0	0	0.188708	0	0.437703	0	0
UCEC	WES	Multivariate	SA470974	0	0	0	0	0	0.0436433	0.695176	0.00202586	0.0212843	0	0.23787	0	0	0
UCEC	WES	Multivariate	SA470844	0.188813	0.481181	0.0372441	0	0	0.105304	0	0.187458	0	0	0	0	0	0
UCEC	WES	Multivariate	SA470744	0.381882	0	0	0	0	0.117756	0	0	0	0.119739	0	0.300612	0	0.0800109
UCEC	WES	Multivariate	SA470631	0.616723	0	0	0	0	0.10435	0	0	0.133517	0.0689553	0	0.0764542	0	0
UCEC	WES	Multivariate	SA470482	0.617561	0.0121574	0	0	0	0.370282	0	0	0	0	0	0	0	0
UCEC	WES	Multivariate	SA470323	0.465479	0.00546389	0	0.141139	0	0	0	0	0	0	0	0.285914	0	0.102005
UCEC	WES	Multivariate	SA475183	0	0	0	0	0	0	0.0526734	0	0.120512	0.168651	0	0.36826	0	0.289904
UCEC	WES	Multivariate	SA475045	0.0479756	0	0	0	0	0.261153	0	0	0	0.123765	0	0.370577	0	0.196529
UCEC	WES	Multivariate	SA474819	0.316108	0	0	0	0	0	0	0	0	0.122914	0	0.12471	0.298225	0.138043
UCEC	WES	Multivariate	SA474679	0.252111	0.0287855	0	0.698811	0	0	0	0.0202924	0	0	0	0	0	0
UCEC	WES	Multivariate	SA474508	0.564075	0	0	0.169844	0	0.261542	0	0.00453828	0	0	0	0	0	0
UCEC	WES	Multivariate	SA474415	0.346033	0	0	0.220201	0	0	0	0	0.0795418	0.135752	0	0.218472	0	0
UCEC	WES	Multivariate	SA474310	0.229367	0	0	0.770633	0	0	0	0	0	0	0	0	0	0
UCEC	WES	Multivariate	SA474191	0.447569	0	0.102684	0.314412	0	0	0	0.0553554	0	0	0.0799802	0	0	0
UCEC	WES	Multivariate	SA474061	0	0	0	0.206641	0.336827	0	0.0791637	0	0	0.099772	0	0.277597	0	0
UCEC	WES	Multivariate	SA473906	0.357456	0	0	0.137554	0	0	0.0318608	0	0	0.173447	0	0.299683	0	0
UCEC	WES	Multivariate	SA473717	0.0531592	0	0.226536	0.321723	0	0.290903	0	0.107679	0	0	0	0	0	0
UCEC	WES	Multivariate	SA473549	0	0	0.0250864	0	0	0.0370151	0.611304	0.000269379	0	0	0.326325	0	0	0
UCEC	WES	Multivariate	SA473473	0.430823	0	0.00436486	0.564812	0	0	0	0	0	0	0	0	0	0
UCEC	WES	Multivariate	SA473365	0	0.00558857	0	0	0	0	0.525894	0	0.222374	0.167232	0.0789108	0	0	0
UCEC	WES	Multivariate	SA473254	0	0	0	0	0.351946	0.0644719	0	0	0.143322	0	0	0.231495	0	0.208765
UCEC	WES	Multivariate	SA473127	0	0	0	0.232115	0.382135	0	0.0338746	0	0	0.0759389	0	0.275937	0	0
UCEC	WES	Multivariate	SA473026	0	0.30764	0	0.175197	0	0	0	0.517163	0	0	0	0	0	0
UCEC	WES	Multivariate	SA472897	0	0	0	0	0	0.0334824	0.744651	0.000151695	0	0	0.221715	0	0	0
UCEC	WES	Multivariate	SA472759	0.258148	0	0	0	0.131691	0	0	0.0344136	0	0.143366	0	0.432382	0	0
UCEC	WES	Multivariate	SA472613	0.653943	0	0.056642	0.00174445	0	0.287671	0	0	0	0	0	0	0	0
UCEC	WES	Multivariate	SA472509	0.410838	0.0179617	0	0.437178	0	0	0	0	0	0	0.134021	0	0	0
UCEC	WES	Multivariate	SA472392	0.314467	0.0440402	0	0.333248	0	0.119209	0	0.189036	0	0	0	0	0	0
UCEC	WES	Multivariate	SA472294	0.114923	0	0	0.29453	0.386946	0	0	0	0	0	0	0.0669086	0	0.136692
UCEC	WES	Multivariate	SA472165	0.11047	0	0	0	0	0	0	0.0358272	0	0.291544	0	0.430783	0.131376	0
UCEC	WES	Multivariate	SA481428	0.257291	0	0	0	0	0.178431	0	0	0	0.227419	0	0.245945	0.0909143	0
UCEC	WES	Multivariate	SA541537	0.426453	0.0381323	0	0.446938	0	0	0	0.0345291	0	0	0.0539478	0	0	0
UCEC	WES	Multivariate	SA541547	0.277423	0	0.271733	0.394548	0	0	0	0.0408537	0	0	0.0154423	0	0	0
UCEC	WES	Multivariate	SA541556	0.154908	0.0171701	0	0.212542	0.239574	0	0	0	0	0	0	0.375806	0	0
UCEC	WES	Multivariate	SA541508	0.333914	0	0.666086	0	0	0	0	0	0	0	0	0	0	0
UCEC	WES	Multivariate	SA541518	0	0	0.0631631	0	0	0.0058937	0.682265	0.00153943	0	0	0.247139	0	0	0
UCEC	WES	Multivariate	SA541528	0.230598	0.0996967	0	0.413908	0	0.153096	0	0.102702	0	0	0	0	0	0
UCEC	WES	Multivariate	SA481160	0	0	0.126201	0	0	0	0.188565	0	0.574899	0	0.028859	0.0814759	0	0
UCEC	WES	Multivariate	SA541407	0.397791	0.00087661	0	0.601332	0	0	0	0	0	0	0	0	0	0
UCEC	WES	Multivariate	SA541419	0	0	0	0.200455	0	0	0	0	0.120667	0.201947	0	0.444086	0.0328452	0
UCEC	WES	Multivariate	SA541428	0.335164	0.100469	0	0.546046	0	0	0	0.0183206	0	0	0	0	0	0
UCEC	WES	Multivariate	SA541437	0.42589	0.110062	0	0.172336	0	0.256013	0	0.0356985	0	0	0	0	0	0
UCEC	WES	Multivariate	SA541499	0.230724	0	0	0.0808451	0	0	0	0	0	0.24036	0	0.409349	0.0387217	0
UCEC	WES	Multivariate	SA541489	0.24243	0	0	0	0.274033	0	0.0623318	0	0	0.152067	0	0.269138	0	0
UCEC	WES	Multivariate	SA541374	0.614344	0.014812	0	0.187525	0	0.143975	0	0	0	0	0.039344	0	0	0
UCEC	WES	Multivariate	SA541387	0	0	0	0.346009	0	0	0.199067	0	0.151029	0	0	0.0984675	0.205428	0
UCEC	WES	Multivariate	SA541397	0.299825	0.0246854	0	0.67549	0	0	0	0	0	0	0	0	0	0
UCEC	WES	Multivariate	SA481310	0	0	0.0232874	0	0	0.0294787	0.635537	0	0.0123907	0	0.299306	0	0	0
UCEC	WES	Multivariate	SA480879	0.76246	0.0148661	0	0	0	0.15471	0	0.0215986	0	0	0.0463649	0	0	0
UCEC	WES	Multivariate	SA480997	0.204832	0.032053	0	0	0	0	0	0	0.185166	0.188837	0	0.389111	0	0
UCEC	WES	Multivariate	SA480740	0.273411	0.0532658	0	0.673324	0	0	0	0	0	0	0	0	0	0
UCEC	WES	Multivariate	SA480444	0.347119	0.15182	0	0.357619	0	0	0	0	0	0	0.143442	0	0	0
UCEC	WES	Multivariate	SA480133	0.151231	0.0660813	0.395444	0.293522	0	0	0	0	0	0	0.0937208	0	0	0
UCEC	WES	Multivariate	SA480294	0.147836	0.0350182	0.632271	0	0	0	0	0.0249441	0	0	0.159931	0	0	0
UCEC	WES	Multivariate	SA479890	0.270892	0	0	0	0	0.130535	0	0	0	0.0706207	0	0.410322	0	0.117631
UCEC	WES	Multivariate	SA479724	0.656871	0.135644	0.207486	0	0	0	0	0	0	0	0	0	0	0
UCEC	WES	Multivariate	SA479609	0.314764	0.0762379	0	0.325778	0	0	0	0.0403672	0	0	0.242854	0	0	0
UCEC	WES	Multivariate	SA479524	0.0189428	0	0	0	0	0	0.0220464	0	0	0.0824882	0	0.420017	0	0.456506
UCEC	WES	Multivariate	SA479365	0.176892	0	0.0973589	0.697997	0	0	0	0	0	0	0.0277514	0	0	0
UCEC	WES	Multivariate	SA479275	0.437216	0.131506	0	0.148773	0	0.197934	0	0	0	0	0.0845708	0	0	0
UCEC	WES	Multivariate	SA479052	0.0386235	0.0171478	0.782609	0	0	0	0	0.0339798	0	0	0.12764	0	0	0
UCEC	WES	Multivariate	SA470228	0.2641	0.0823758	0.29149	0.245818	0	0	0	0.116216	0	0	0	0	0	0
UCEC	WES	Multivariate	SA479168	0.281024	0.0591251	0	0.517388	0	0.0576498	0	0.0848137	0	0	0	0	0	0
UCEC	WES	Multivariate	SA478822	0.124762	0	0	0.43212	0.177648	0	0.086452	0	0	0.179018	0	0	0	0
UCEC	WES	Multivariate	SA478933	0.347336	0.127107	0.182445	0.102093	0	0.241019	0	0	0	0	0	0	0	0
UCEC	WES	Multivariate	SA470114	0.0869312	0	0	0	0	0	0	0	0.111958	0.11588	0	0.480166	0	0.205065
UCEC	WES	Multivariate	SA541471	0.279824	0.0837068	0.430753	0	0	0	0	0.0262214	0	0	0.179495	0	0	0
UCEC	WES	Multivariate	SA541480	0.868723	0	0	0	0.131277	0	0	0	0	0	0	0	0	0
UCEC	WES	Multivariate	SA478702	0	0	0	0.128533	0.0909514	0	0.277451	0	0.379815	0	0	0	0.123249	0
UCEC	WES	Multivariate	SA469974	0	0.0307787	0	0.273997	0	0	0	0	0	0.189862	0	0.163043	0.34232	0
UCEC	WES	Multivariate	SA469755	0.53196	0.00476297	0	0.418263	0	0	0	0.0330061	0	0	0.0120085	0	0	0
UCEC	WES	Multivariate	SA478465	0.490108	0.17372	0.311528	0	0	0	0	0	0	0	0.0246444	0	0	0
UCEC	WES	Multivariate	SA469864	0.256656	0	0	0	0.105019	0.109197	0	0	0	0.205235	0	0.323894	0	0
UCEC	WES	Multivariate	SA478597	0.534232	0	0	0	0	0	0	0	0.257505	0.121763	0	0.0865006	0	0
UCEC	WES	Multivariate	SA469613	0.195629	0	0	0.056707	0.319141	0	0	0	0.0890649	0	0	0.339458	0	0
UCEC	WES	Multivariate	SA478222	0.396304	0	0	0.477956	0	0	0	0.0083654	0	0	0.117374	0	0	0
UCEC	WES	Multivariate	SA478330	0.0197008	0	0	0.233744	0	0	0	0	0	0.172277	0	0.456762	0.117517	0
UCEC	WES	Multivariate	SA478107	0.464838	0.0529185	0.284455	0	0	0	0	0.131488	0	0	0.0663015	0	0	0
UCEC	WES	Multivariate	SA469463	0.294884	0.105648	0	0.599468	0	0	0	0	0	0	0	0	0	0
UCEC	WES	Multivariate	SA477779	0.0631848	0.0996676	0.592341	0.189664	0	0	0	0	0	0	0.0551427	0	0	0
UCEC	WES	Multivariate	SA477907	0	0	0.228717	0.600707	0	0.067935	0	0	0	0	0.102641	0	0	0
UCEC	WES	Multivariate	SA469291	0.167899	0	0.191512	0.454259	0	0	0	0.0989197	0	0	0.0874107	0	0	0
UCEC	WES	Multivariate	SA469062	0.487706	0.0103961	0.44382	0	0	0	0	0.0580775	0	0	0	0	0	0
UCEC	WES	Multivariate	SA469173	0.486019	0.0893829	0	0.0880659	0	0.336532	0	0	0	0	0	0	0	0
UCEC	WES	Multivariate	SA468923	0	0	0	0	0	0.00779872	0.00267195	0	0	0.104523	0	0.0163479	0	0.868659
UCEC	WES	Multivariate	SA468793	0.155558	0.063208	0	0.688491	0	0	0	0.0490755	0	0	0.0436677	0	0	0
UCEC	WES	Multivariate	SA477658	0.0601299	0.0983351	0.0272009	0.703569	0	0	0	0.110765	0	0	0	0	0	0
UCEC	WES	Multivariate	SA477543	0.361795	0	0	0.109107	0	0	0	0	0	0.119236	0	0.319782	0	0.0900799
UCEC	WES	Multivariate	SA477443	0	0	0	0.257428	0	0.0939041	0.181761	0	0.418781	0	0	0.0481253	0	0
UCEC	WES	Multivariate	SA477113	0	0	0	0	0	0.0294237	0.504308	0	0.243935	0	0.222333	0	0	0
UCEC	WES	Multivariate	SA477328	0.282238	0	0	0	0.127364	0	0	0	0	0	0	0.362585	0.073539	0.154274
UCEC	WES	Multivariate	SA468604	0.758559	0.00137038	0	0	0	0	0.0068188	0	0	0	0	0.181627	0	0.0516249
UCEC	WES	Multivariate	SA477014	0.474225	0.128089	0.297014	0.096547	0	0	0	0	0	0	0.00412529	0	0	0
UCEC	WES	Multivariate	SA476884	0.591735	0.104418	0	0.124949	0	0.114683	0	0	0	0	0.0642142	0	0	0
UCEC	WES	Multivariate	SA468285	0.14022	0.0611748	0.122025	0.581479	0	0	0	0.0951007	0	0	0	0	0	0
UCEC	WES	Multivariate	SA476754	0.388883	0.0822114	0.308782	0.11595	0	0.104173	0	0	0	0	0	0	0	0
UCEC	WES	Multivariate	SA468429	0.140021	0	0.167984	0.375376	0	0.276219	0	0.0404004	0	0	0	0	0	0
UCEC	WES	Multivariate	SA468110	0.22082	0.394969	0	0	0	0.203219	0	0.0965305	0	0	0.0844614	0	0	0
UCEC	WES	Multivariate	SA476506	0	0	0	0	0	0.0414778	0.613756	0	0.142408	0	0.050062	0	0	0.152296
UCEC	WES	Multivariate	SA476625	0.77895	0	0	0.0978217	0	0	0	0.0199147	0	0	0.103314	0	0	0
UCEC	WES	Multivariate	SA476251	0.241043	0.0815264	0.604841	0.0181196	0	0	0	0.0544704	0	0	0	0	0	0
UCEC	WES	Multivariate	SA467981	0.260377	0.0951575	0.187993	0.386721	0	0	0	0.0697513	0	0	0	0	0	0
UCEC	WES	Multivariate	SA476405	0.178689	0	0	0	0	0	0	0	0.0594752	0.167445	0	0.479964	0	0.114428
UCEC	WES	Multivariate	SA484422	0.221733	0	0	0.147938	0.110181	0	0	0	0	0.175926	0	0.344222	0	0
UCEC	WES	Multivariate	SA484281	0.263957	0.0356787	0	0	0	0	0	0	0	0.197029	0	0.324946	0	0.178388
UCEC	WES	Multivariate	SA484079	0.409544	0.13721	0	0.22529	0	0	0	0.162551	0	0	0.065405	0	0	0
UCEC	WES	Multivariate	SA483959	0	0	0	0.0334796	0	0.0688412	0.752112	0.000856664	0	0	0.144711	0	0	0
UCEC	WES	Multivariate	SA485479	0.521147	0.0565066	0	0.422347	0	0	0	0	0	0	0	0	0	0
UCEC	WES	Multivariate	SA485609	0	0	0.22159	0	0	0	0	0	0.214858	0	0	0.563552	0	0
UCEC	WES	Multivariate	SA485371	0.57359	0	0.0701808	0.228936	0	0	0	0.0621984	0	0	0.0650955	0	0	0
UCEC	WES	Multivariate	SA485251	0.569609	0.0249653	0	0.265934	0	0	0	0.0227283	0	0	0.116764	0	0	0
UCEC	WES	Multivariate	SA485131	0.743119	0.0160765	0.175688	0	0	0.0651166	0	0	0	0	0	0	0	0
UCEC	WES	Multivariate	SA484871	0.497252	0.00190317	0.351083	0	0	0	0	0.149762	0	0	0	0	0	0
UCEC	WES	Multivariate	SA485016	0.0866635	0.177436	0.293856	0.128635	0	0	0	0.313409	0	0	0	0	0	0
UCEC	WES	Multivariate	SA484672	0	0.0543308	0.383745	0.440473	0	0	0	0.121451	0	0	0	0	0	0
UCEC	WES	Multivariate	SA484540	0.309795	0.103306	0	0.580608	0	0	0	0.00629044	0	0	0	0	0	0
UCEC	WES	Multivariate	SA483840	0.478713	0	0.0958323	0.334957	0	0.0904981	0	0	0	0	0	0	0	0
UCEC	WES	Multivariate	SA482329	0.155949	0	0	0	0	0	0	0.031237	0.25317	0.11328	0	0.446365	0	0
UCEC	WES	Multivariate	SA483728	0.371212	0.0180768	0	0	0	0	0	0	0	0.0908162	0	0.424983	0	0.0949124
UCEC	WES	Multivariate	SA483507	0.498899	0	0	0	0	0	0	0	0.16893	0.263791	0	0	0	0.0683802
UCEC	WES	Multivariate	SA483617	0.480244	0.0378968	0.0332466	0.0185535	0	0.430059	0	0	0	0	0	0	0	0
UCEC	WES	Multivariate	SA483417	0.215651	0.0442523	0.642317	0.0504291	0	0	0	0	0	0	0.0473508	0	0	0
UCEC	WES	Multivariate	SA483292	0.453742	0	0	0.459382	0	0.0868755	0	0	0	0	0	0	0	0
UCEC	WES	Multivariate	SA483165	0.267888	0.00653048	0	0	0	0	0	0	0	0.170888	0	0.473287	0.0814059	0
UCEC	WES	Multivariate	SA482840	0.301522	0	0	0.411614	0	0	0	0.0355241	0	0	0.25134	0	0	0
UCEC	WES	Multivariate	SA483024	0.356382	0.0565936	0.11627	0.459005	0	0	0	0	0	0	0.0117494	0	0	0
UCEC	WES	Multivariate	SA482698	0.122546	0.0141825	0	0.151812	0.309375	0	0	0	0	0	0	0.402085	0	0
UCEC	WES	Multivariate	SA482468	0.603638	0.015292	0	0.211936	0	0	0	0.0178597	0	0	0.151274	0	0	0
UCEC	WES	Multivariate	SA482148	0	0	0	0.066152	0	0.0529135	0.798379	0.00308984	0	0	0.0794657	0	0	0
UCEC	WES	Multivariate	SA482002	0.0500996	0	0	0	0	0	0	0	0.181623	0.1367	0	0.352358	0	0.279219
UCEC	WES	Multivariate	SA481813	0.0496935	0	0	0.320016	0.336391	0	0	0	0.143655	0	0	0.150243	0	0
UCEC	WES	Multivariate	SA481539	0.222752	0	0	0.583244	0	0	0	0.194005	0	0	0	0	0	0
UCEC	WES	Multivariate	SA481718	0.646144	0.186347	0.16751	0	0	0	0	0	0	0	0	0	0	0
UCEC	WES	Multivariate	SA541610	0	0	0.0319468	0	0	0.0237265	0.82836	0.00330945	0	0	0.112657	0	0	0
UCEC	WES	Multivariate	SA541565	0.647498	0.00275654	0	0.272831	0	0	0	0.0312272	0	0	0.0456865	0	0	0
UCEC	WES	Multivariate	SA541574	0.177053	0.133631	0.340335	0	0	0	0	0.345144	0	0	0.00383738	0	0	0
UCEC	WES	Multivariate	SA541583	0.298342	0.0318679	0	0.529825	0	0	0	0.0848452	0	0	0.055119	0	0	0
UCEC	WES	Multivariate	SA541592	0.45447	0	0.361367	0	0	0.184163	0	0	0	0	0	0	0	0
UCEC	WES	Multivariate	SA541601	0.186457	0	0	0.346288	0	0	0	0	0.226475	0.0119713	0	0.228808	0	0
UCEC	WES	Multivariate	SA463469	0.478897	0.0857075	0.303337	0	0	0	0	0.0679652	0	0	0.0640931	0	0	0
UCEC	WES	Multivariate	SA485728	0.348181	0	0.102106	0	0	0	0	0	0	0.100987	0	0.368613	0.0801125	0
UCEC	WES	Multivariate	SA463205	0.728429	0	0	0	0.115712	0	0	0	0.0339558	0	0	0.0428969	0	0.0790069
UCEC	WES	Multivariate	SA463322	0.32908	0	0	0.0268639	0	0	0.0146802	0	0.496705	0.13267	0	0	0	0
UCEC	WES	Multivariate	SA485302	0.133762	0	0	0	0	0.078638	0.453846	0	0.100294	0.23346	0	0	0	0
UCEC	WES	Multivariate	SA485161	0.319546	0.000365349	0	0.680089	0	0	0	0	0	0	0	0	0	0
UCEC	WES	Multivariate	SA485042	0	0	0.0472418	0	0	0.0379313	0.709719	0.000436833	0	0	0.204671	0	0	0
UCEC	WES	Multivariate	SA462861	0	0	0	0.229337	0.237527	0	0	0	0.151051	0	0	0.162443	0	0.219641
UCEC	WES	Multivariate	SA469855	0.256719	0	0	0	0.291971	0	0.0463152	0	0	0.113944	0	0.29105	0	0
UCEC	WES	Multivariate	SA462717	0	0	0	0	0	0.127853	0.0790648	0	0.568745	0	0	0.138171	0.086166	0
UCEC	WES	Multivariate	SA484941	0.661145	0	0	0	0.195792	0	0	0	0.0737001	0	0	0.0693628	0	0
UCEC	WES	Multivariate	SA469734	0.134751	0	0	0	0	0	0.217293	0	0.456706	0	0	0.117579	0.0736705	0
UCEC	WES	Multivariate	SA462629	0.155162	0	0	0	0.313099	0	0	0	0.0674848	0	0	0.320178	0	0.144076
UCEC	WES	Multivariate	SA484821	0.356057	0.0230228	0	0	0.387673	0	0.0618133	0	0	0.171434	0	0	0	0
UCEC	WES	Multivariate	SA469433	0.489184	0.0604518	0.226459	0.202198	0	0	0	0	0	0	0.0217069	0	0	0
UCEC	WES	Multivariate	SA462548	0.253013	0.0287996	0	0	0.428066	0	0	0	0	0	0	0.224307	0.0658142	0
UCEC	WES	Multivariate	SA469543	0.126296	0.0310389	0	0.658143	0	0	0	0.0535534	0	0	0.130968	0	0	0
UCEC	WES	Multivariate	SA469202	0	0	0.0353079	0	0	0.0122114	0.729876	0.00249879	0	0	0.220106	0	0	0
UCEC	WES	Multivariate	SA462416	0.296697	0.054568	0	0.0889546	0	0.0264096	0	0	0	0	0.533371	0	0	0
UCEC	WES	Multivariate	SA484520	0.214278	0	0	0	0	0	0	0	0.0901391	0.271033	0	0.264192	0	0.160357
UCEC	WES	Multivariate	SA469300	0.22658	0.138822	0.33519	0	0	0	0	0.223154	0	0	0.0762543	0	0	0
UCEC	WES	Multivariate	SA484392	0.23296	0	0	0	0	0	0	5.46e-05	0	0.263132	0	0.383893	0	0.11996
UCEC	WES	Multivariate	SA462324	0.184856	0.196466	0.0217284	0.452881	0	0	0	0	0	0	0.144069	0	0	0
UCEC	WES	Multivariate	SA469072	0.312921	0.0351471	0.382652	0.210661	0	0	0	0.0586186	0	0	0	0	0	0
UCEC	WES	Multivariate	SA462136	0.489189	0	0.283774	0.00423385	0	0.222802	0	0	0	0	0	0	0	0
UCEC	WES	Multivariate	SA484162	0.645506	0	0	0.0419656	0	0.294496	0	0.018033	0	0	0	0	0	0
UCEC	WES	Multivariate	SA462220	0.0863712	0	0	0	0.281889	0	0	0	0	0.310948	0	0.244145	0	0.0766473
UCEC	WES	Multivariate	SA484286	0.423082	0	0	0.124992	0	0.2562	0	0.140277	0	0	0.0554483	0	0	0
UCEC	WES	Multivariate	SA484051	0	0	0	0.222267	0.211223	0	0	0	0.0716629	0	0	0.229761	0	0.265086
UCEC	WES	Multivariate	SA462057	0	0	0	0	0.380387	0	0.0166578	0	0	0.169493	0	0.285194	0	0.148269
UCEC	WES	Multivariate	SA461953	0.442601	0	0	0	0	0	0	0	0.147377	0.0678532	0	0.289906	0.0522629	0
UCEC	WES	Multivariate	SA483954	0.208723	0.0267478	0	0	0	0	0	0	0.19253	0.155549	0	0.41645	0	0
UCEC	WES	Multivariate	SA471045	0.668159	0.0340156	0	0.176729	0	0.0123918	0	0	0	0	0.108705	0	0	0
UCEC	WES	Multivariate	SA470874	0.757068	0.074133	0	0	0	0	0	0	0	0	0.168799	0	0	0
UCEC	WES	Multivariate	SA470749	0.0442314	0	0.174393	0.400825	0	0	0	0.304647	0	0	0.0759043	0	0	0
UCEC	WES	Multivariate	SA470651	0.178999	0.312444	0	0.166064	0	0	0	0.280686	0	0	0.061808	0	0	0
UCEC	WES	Multivariate	SA470561	0.417338	0.013387	0	0	0	0	0	0	0.074848	0.112836	0	0.381591	0	0
UCEC	WES	Multivariate	SA470462	0.377241	0.0185071	0.232518	0.370391	0	0	0	0.00134258	0	0	0	0	0	0
UCEC	WES	Multivariate	SA463097	0.0719884	0	0	0	0	0	0	0	0.284115	0.101805	0	0.354253	0	0.187839
UCEC	WES	Multivariate	SA470183	0.180809	0.13394	0	0.586382	0	0	0	0.098869	0	0	0	0	0	0
UCEC	WES	Multivariate	SA462985	0.597685	0.0504706	0	0.176243	0	0.0526741	0	0	0	0	0.122928	0	0	0
UCEC	WES	Multivariate	SA470333	0.539588	0.0202354	0	0	0	0.40919	0	0.0309863	0	0	0	0	0	0
UCEC	WES	Multivariate	SA483791	0.0849259	0	0	0.103504	0.463001	0	0	0	0.0814609	0	0	0.267109	0	0
UCEC	WES	Multivariate	SA483558	0.0853775	0	0.0838508	0.658542	0	0	0	0.13665	0	0	0.0355795	0	0	0
UCEC	WES	Multivariate	SA483688	0.25175	0	0	0.545558	0	0	0	0.0992185	0	0	0.103474	0	0	0
UCEC	WES	Multivariate	SA483437	0.592198	0.0829119	0	0.233553	0	0	0	0.0540997	0	0	0.0372375	0	0	0
UCEC	WES	Multivariate	SA467279	0.767284	0	0	0.206773	0	0.0259424	0	0	0	0	0	0	0	0
UCEC	WES	Multivariate	SA467398	0.270806	0	0	0.308113	0	0	0	0	0	0.0839097	0	0.233606	0.103566	0
UCEC	WES	Multivariate	SA461377	0.451056	0.102887	0.412577	0	0	0	0	0.0334799	0	0	0	0	0	0
UCEC	WES	Multivariate	SA483181	0.0713934	0.454395	0	0.0104873	0	0	0	0.463724	0	0	0	0	0	0
UCEC	WES	Multivariate	SA483064	0.502179	0	0	0	0	0.0371217	0	0	0.176463	0.118198	0	0.166038	0	0
UCEC	WES	Multivariate	SA461277	0.269167	0.283817	0	0.201438	0	0	0	0.245578	0	0	0	0	0	0
UCEC	WES	Multivariate	SA467178	0.37616	0.0143376	0	0.355887	0	0.159044	0	0	0	0	0.0945721	0	0	0
UCEC	WES	Multivariate	SA482945	0.243752	0.0128707	0	0	0	0.0529413	0	0	0.0981514	0	0	0	0	0.592285
UCEC	WES	Multivariate	SA461177	0.227494	0.273007	0	0.421769	0	0	0	0.0777305	0	0	0	0	0	0
UCEC	WES	Multivariate	SA461016	0.342548	0	0	0.496273	0	0.154242	0	0.00693658	0	0	0	0	0	0
UCEC	WES	Multivariate	SA482807	0.156727	0	0	0	0	0	0.0713722	0	0	0.15945	0	0.441644	0	0.170807
UCEC	WES	Multivariate	SA466838	0.41479	0	0	0	0.0733072	0	0	0	0.0884452	0	0	0.231633	0	0.191825
UCEC	WES	Multivariate	SA467039	0	0	0	0.118037	0	0	0.762824	0	0	0.0230823	0.0388099	0	0	0.0572469
UCEC	WES	Multivariate	SA482638	0.505271	0.0539206	0	0.396275	0	0	0	0	0	0	0.0445328	0	0	0
UCEC	WES	Multivariate	SA460898	0.464639	0.120796	0.0735033	0	0	0.341061	0	0	0	0	0	0	0	0
UCEC	WES	Multivariate	SA460764	0.74511	0	0.170186	0.0214948	0	0	0	0	0	0	0.0632094	0	0	0
UCEC	WES	Multivariate	SA482527	0.314613	0	0	0	0.122416	0	0	0	0.119766	0.108843	0	0.334362	0	0
UCEC	WES	Multivariate	SA482289	0.498389	0.165573	0	0.313875	0	0	0	0.022162	0	0	0	0	0	0
UCEC	WES	Multivariate	SA460515	0	0	0	0	0	0.0359372	0.675003	0.0048883	0	0	0.284171	0	0	0
UCEC	WES	Multivariate	SA482408	0.509712	0	0.312439	0.0786009	0	0	0	0	0	0	0.0992482	0	0	0
UCEC	WES	Multivariate	SA460628	0.382237	0	0	0.0378223	0	0	0	0	0	0.131409	0	0.297141	0	0.151391
UCEC	WES	Multivariate	SA482184	0.134205	0.200699	0	0.255142	0	0	0	0.402601	0	0	0.00735284	0	0	0
UCEC	WES	Multivariate	SA482061	0.712756	0.113914	0	0	0	0.17333	0	0	0	0	0	0	0	0
UCEC	WES	Multivariate	SA481882	0.201946	0	0	0.123181	0	0	0	0	0	0.221957	0	0.405969	0.046947	0
UCEC	WES	Multivariate	SA468933	0.291468	0	0	0	0	0	0	0	0.193995	0.514537	0	0	0	0
UCEC	WES	Multivariate	SA468764	0.107859	0.147013	0.136516	0.197352	0	0	0	0.41126	0	0	0	0	0	0
UCEC	WES	Multivariate	SA468664	0.385481	0	0.112308	0.30984	0	0.0667944	0	0	0	0	0.125577	0	0	0
UCEC	WES	Multivariate	SA468575	0.542834	0.169507	0	0.16856	0	0	0	0	0	0	0.1191	0	0	0
UCEC	WES	Multivariate	SA468444	0.412919	0.0733287	0.13238	0.362037	0	0	0	0.019335	0	0	0	0	0	0
UCEC	WES	Multivariate	SA461864	0.587806	0.0498309	0	0	0	0.210768	0	0	0	0	0.151595	0	0	0
UCEC	WES	Multivariate	SA468324	0.372353	0	0	0.584001	0	0	0	0	0	0	0.0436453	0	0	0
UCEC	WES	Multivariate	SA468216	0.614075	0	0.0208474	0.336507	0	0	0	0.010868	0	0	0.0177033	0	0	0
UCEC	WES	Multivariate	SA461749	0.113752	0	0	0.711582	0	0.0999266	0	0.0747395	0	0	0	0	0	0
UCEC	WES	Multivariate	SA468101	0.2716	0.158256	0	0.166982	0	0.292234	0	0.110927	0	0	0	0	0	0
UCEC	WES	Multivariate	SA461650	0.202532	0	0	0.126325	0.174458	0	0	0	0	0.0856339	0	0.411051	0	0
UCEC	WES	Multivariate	SA467990	0.266788	0.0463183	0	0.652501	0	0	0	0.0160738	0	0	0.0183185	0	0	0
UCEC	WES	Multivariate	SA467853	0.406452	0	0	0.591194	0	0	0	0.00235405	0	0	0	0	0	0
UCEC	WES	Multivariate	SA461560	0	0.0275086	0	0	0	0.235406	0.0922109	0	0.455266	0	0	0.189609	0	0
UCEC	WES	Multivariate	SA483293	0.066289	0.0518828	0.840606	0	0	0	0	0.0412221	0	0	0	0	0	0
UCEC	WES	Multivariate	SA467568	0	0	0.0379316	0	0	0	0.690199	0	0	0	0.271869	0	0	0
UCEC	WES	Multivariate	SA461468	0.406473	0	0	0.254125	0	0.114008	0	0.110484	0	0	0.114909	0	0	0
UCEC	WES	Multivariate	SA467723	0.344178	0	0	0	0.295176	0	0.0784203	0	0	0.096042	0	0.186183	0	0
UCEC	WES	Multivariate	SA476079	0	0.0172166	0	0.00832146	0	0	0.838789	0	0	0.0579566	0	0	0.0777166	0
UCEC	WES	Multivariate	SA467873	0.621169	0	0	0.126677	0	0.201101	0	0.0228875	0	0	0.028166	0	0	0
UCEC	WES	Multivariate	SA475852	0.196175	0.0639757	0.498535	0	0	0.0747028	0	0	0	0	0.166612	0	0	0
UCEC	WES	Multivariate	SA467663	0.637843	0.0418555	0	0.12547	0	0.194832	0	0	0	0	0	0	0	0
UCEC	WES	Multivariate	SA475971	0	0.000426718	0.0987019	0.138216	0	0	0	0	0.321684	0	0	0.440971	0	0
UCEC	WES	Multivariate	SA467774	0.338414	0.0981643	0.424414	0.108388	0	0	0	0	0	0	0.0306198	0	0	0
UCEC	WES	Multivariate	SA475591	0.133976	0.31542	0	0.424255	0	0	0	0.0510299	0	0	0.0753193	0	0	0
UCEC	WES	Multivariate	SA475721	0.712025	0.0870248	0	0	0	0.200951	0	0	0	0	0	0	0	0
UCEC	WES	Multivariate	SA467449	0.411038	0	0	0	0	0	0	0	0	0.103484	0	0.389652	0	0.0958262
UCEC	WES	Multivariate	SA467329	0.61743	0.0385216	0	0.105345	0	0	0	0.039764	0	0	0.19894	0	0	0
UCEC	WES	Multivariate	SA467209	0.47415	0	0.305973	0	0	0	0	0.0236248	0	0	0.196251	0	0	0
UCEC	WES	Multivariate	SA467099	0.195064	0.0604813	0.269217	0.38289	0	0.0923473	0	0	0	0	0	0	0	0
UCEC	WES	Multivariate	SA475378	0	0	0	0	0	0.0616179	0.662033	0.00336247	0	0	0.272987	0	0	0
UCEC	WES	Multivariate	SA475224	0	0.023203	0	0.320149	0.297199	0	0	0	0	0	0	0.269598	0	0.0898514
UCEC	WES	Multivariate	SA475069	0.275419	0.0685349	0	0.600495	0	0	0	0.00576723	0	0	0.0497834	0	0	0
UCEC	WES	Multivariate	SA474860	0.464393	0	0	0.519058	0	0	0	0.0165487	0	0	0	0	0	0
UCEC	WES	Multivariate	SA474684	0.240232	0.0242533	0	0.596388	0	0	0	0.0555404	0	0	0.0835857	0	0	0
UCEC	WES	Multivariate	SA466958	0	0	0	0.0303842	0	0.0808353	0.765934	0	0.0156778	0	0.107169	0	0	0
UCEC	WES	Multivariate	SA474448	0.155696	0	0	0	0.216134	0	0	0	0.160768	0	0	0.358377	0.109025	0
UCEC	WES	Multivariate	SA474561	0	0	0	0.0766413	0	0.0362012	0.803553	0.0081384	0	0	0.0754665	0	0	0
UCEC	WES	Multivariate	SA474171	0.543761	0	0.291323	0.109936	0	0	0	0.0359384	0	0	0.019042	0	0	0
UCEC	WES	Multivariate	SA466709	0.0388484	0.0067001	0.112849	0.797381	0	0	0	0.0442212	0	0	0	0	0	0
UCEC	WES	Multivariate	SA474315	0.459857	0.108808	0	0.382591	0	0	0	0.015034	0	0	0.0337106	0	0	0
UCEC	WES	Multivariate	SA466422	0.200355	0	0	0.208782	0	0	0	0	0.215182	0.118666	0	0.257015	0	0
UCEC	WES	Multivariate	SA474041	0	0	0	0.0964098	0.219877	0	0	0	0	0.238445	0	0.407399	0.0378688	0
UCEC	WES	Multivariate	SA466549	0.503766	0.0992516	0.307134	0.0528491	0	0	0	0	0	0	0.036999	0	0	0
UCEC	WES	Multivariate	SA473738	0.522667	0	0	0	0.245778	0	0	0	0	0	0	0.190937	0.0406181	0
UCEC	WES	Multivariate	SA466263	0.493491	0	0	0	0.273807	0	0	0	0.0412429	0	0	0.18536	0.0060989	0
UCEC	WES	Multivariate	SA473857	0.63638	0	0.0534649	0.233757	0	0	0	0.0763984	0	0	0	0	0	0
UCEC	WES	Multivariate	SA473423	0.538978	0.124593	0	0.16855	0	0	0	0	0	0	0.167879	0	0	0
UCEC	WES	Multivariate	SA466135	0	0	0.187535	0	0	0	0.00415577	0	0	0	0	0.111776	0	0.696533
UCEC	WES	Multivariate	SA473599	0.204594	0.078295	0.343274	0.242441	0	0	0	0.131397	0	0	0	0	0	0
UCEC	WES	Multivariate	SA475492	0.39866	0	0	0.286646	0	0.134171	0	0.0290332	0	0	0.151489	0	0	0
UCEC	WES	Multivariate	SA465986	0.317985	0	0	0.522914	0	0	0	0.0953624	0	0	0.0637385	0	0	0
UCEC	WES	Multivariate	SA473314	0.403235	0.155065	0	0.308205	0	0	0	0.0504335	0	0	0.0830619	0	0	0
UCEC	WES	Multivariate	SA465555	0.525976	0.0158286	0.248681	0	0	0.0109835	0	0.198531	0	0	0	0	0	0
UCEC	WES	Multivariate	SA465700	0.324055	0	0	0.425235	0	0.176036	0	0	0	0	0.0746744	0	0	0
UCEC	WES	Multivariate	SA465386	0.0294389	0	0	0	0	0	0.379009	0	0.419572	0.0354248	0	0	0	0.136555
UCEC	WES	Multivariate	SA465295	0.57893	0.0363356	0	0.196226	0	0	0	0.0563426	0	0	0.132166	0	0	0
UCEC	WES	Multivariate	SA465164	0.444416	0	0	0.494473	0	0	0	0	0	0	0.0611112	0	0	0
UCEC	WES	Multivariate	SA472514	0.670646	0.00304892	0	0.324686	0	0	0	0.00161943	0	0	0	0	0	0
UCEC	WES	Multivariate	SA472397	0	0.0141335	0	0	0	0.195994	0.101755	0	0.484139	0	0	0.203978	0	0
UCEC	WES	Multivariate	SA472160	0.315856	0	0	0.45469	0	0.14658	0	0.0536508	0	0	0.0292244	0	0	0
UCEC	WES	Multivariate	SA465055	0	0.031747	0.269452	0.587439	0	0.111362	0	0	0	0	0	0	0	0
UCEC	WES	Multivariate	SA464934	0.199935	0	0	0.137146	0.261926	0	0	0	0.107	0	0	0.293993	0	0
UCEC	WES	Multivariate	SA471917	0.302971	0.277871	0.316339	0	0	0	0	0.0277135	0	0	0.0751061	0	0	0
UCEC	WES	Multivariate	SA464725	0	0	0	0	0	0.101917	0.0136891	0	0.737377	0	0	0.118677	0.0283409	0
UCEC	WES	Multivariate	SA472027	0.143394	0.288832	0	0.0467416	0	0	0	0.435252	0	0	0.085781	0	0	0
UCEC	WES	Multivariate	SA486558	0.0647433	0	0	0.188728	0.290785	0	0	0	0	0.0939785	0	0.361765	0	0
UCEC	WES	Multivariate	SA471682	0	0	0	0	0	0	0.214203	0	0.218789	0.315393	0	0	0.121392	0.130224
UCEC	WES	Multivariate	SA471801	0.1517	0	0.0686003	0	0.290767	0	0	0	0.0435591	0	0	0.445374	0	0
UCEC	WES	Multivariate	SA464559	0.0892366	0	0	0	0	0.0979373	0.0388634	0	0.516985	0	0	0.256978	0	0
UCEC	WES	Multivariate	SA471573	0.621865	0.0702381	0	0.0642479	0	0.204922	0	0	0	0	0.0387266	0	0	0
UCEC	WES	Multivariate	SA464390	0.454666	0.00921945	0.2365	0.214853	0	0	0	0.0847624	0	0	0	0	0	0
UCEC	WES	Multivariate	SA486438	0.570777	0	0.0199858	0.246657	0	0	0	0	0	0	0.16258	0	0	0
UCEC	WES	Multivariate	SA464039	0.436934	0	0	0.542728	0	0	0	0.020338	0	0	0	0	0	0
UCEC	WES	Multivariate	SA486123	0	0	0	0.0661977	0	0	0.727296	0	0.0732986	0	0.0506416	0	0	0.0825665
UCEC	WES	Multivariate	SA471334	0.52019	0.03074	0	0.181645	0	0.196417	0	0	0	0	0.0710083	0	0	0
UCEC	WES	Multivariate	SA464240	0.390975	0.0658018	0	0.316992	0	0.226231	0	0	0	0	0	0	0	0
UCEC	WES	Multivariate	SA471463	0.475785	0	0	0	0.368965	0	0	0	0	0	0	0.111023	0.0442277	0
UCEC	WES	Multivariate	SA486287	0.495591	0	0	0	0	0	0.0283415	0	0.13087	0.164477	0	0.180719	0	0
UCEC	WES	Multivariate	SA471144	0.393366	0	0.155501	0.166809	0	0.281651	0	0	0	0	0.00267333	0	0	0
UCEC	WES	Multivariate	SA485946	0.349176	0	0	0.596878	0	0	0	0.0539461	0	0	0	0	0	0
UCEC	WES	Multivariate	SA463859	0.746588	0	0	0	0.192778	0	0	0	0.0200994	0	0	0.0405346	0	0
UCEC	WES	Multivariate	SA471223	0.492107	0	0	0.315052	0	0.192841	0	0	0	0	0	0	0	0
UCEC	WES	Multivariate	SA485838	0.238098	0	0.114664	0	0	0	0	0	0.100662	0.222617	0	0.323959	0	0
UCEC	WES	Multivariate	SA463619	0.867169	0.0424435	0	0	0	0	0	0	0	0	0.0903873	0	0	0
UCEC	WES	Multivariate	SA463739	0.379215	0.0105839	0	0.439514	0	0	0	0	0	0	0.170686	0	0	0
UCEC	WES	Multivariate	SA473193	0.068211	0.156724	0.248462	0	0	0	0	0.474218	0	0	0.0523847	0	0	0
UCEC	WES	Multivariate	SA473076	0	0.0381136	0	0.252315	0.186882	0	0	0	0	0.0675611	0	0.455128	0	0
UCEC	WES	Multivariate	SA472957	0.410717	0.108149	0	0.445094	0	0	0	0.0145789	0	0	0.0214614	0	0	0
UCEC	WES	Multivariate	SA472818	0	0	0	0	0.572598	0	0	0	0.0763759	0.0439636	0	0.171397	0	0.135665
UCEC	WES	Multivariate	SA472709	0	0	0.0334757	0	0	0.0748527	0.679495	0.00622201	0	0	0.205955	0	0	0
UCEC	WES	Multivariate	SA472609	0.457603	0.145638	0.0474021	0.317429	0	0	0	0	0	0	0.0319278	0	0	0
UCEC	WES	Multivariate	SA476984	0.538658	0.0325993	0.25569	0.113624	0	0.0594288	0	0	0	0	0	0	0	0
UCEC	WES	Multivariate	SA541619	0	0	0	0	0	0	0.196249	0	0	0.5405	0	0.121603	0.141648	0
UCEC	WES	Multivariate	SA484691	0.600949	0.0376851	0	0	0	0.282853	0	0.0785127	0	0	0	0	0	0
UCEC	WES	Multivariate	SA466839	0.1871	0.113463	0.699438	0	0	0	0	0	0	0	0	0	0	0

## Sheet: (E)ovarian-WES-Multi.
Malignancy	Assay	Approach	Samples	SBS1_exp	SBS2_exp	SBS3_exp	SBS5_exp	SBS6_exp	SBS8_exp	SBS10_exp	SBS13_exp	SBS15_exp	SBS18_exp	SBS21_exp	SBS26_exp
Ovarian	WES	Multivariate	SA530278	0	0	0.257367	0.382878	0	0.324712	0	0.0247134	0	0.0103292	0	0
Ovarian	WES	Multivariate	SA530285	0.196545	0.0167446	0.71311	0	0	0	0	0.0736003	0	0	0	0
Ovarian	WES	Multivariate	SA526329	0.24121	0.018502	0	0.352722	0	0.323823	0	0.063744	0	0	0	0
Ovarian	WES	Multivariate	SA526336	0.322722	0.0292098	0	0.37452	0	0.241179	0	0.032369	0	0	0	0
Ovarian	WES	Multivariate	SA526343	0.226316	0	0.219023	0	0	0.358755	0	0	0	0.195906	0	0
Ovarian	WES	Multivariate	SA526299	0.0696726	0.0278075	0.267023	0.587487	0	0	0	0.0480101	0	0	0	0
Ovarian	WES	Multivariate	SA526306	0.187606	0.152396	0.126	0.333839	0	0.200158	0	0	0	0	0	0
Ovarian	WES	Multivariate	SA526285	0.41855	0.0424192	0.478348	0	0	0	0	0.0204629	0	0.040219	0	0
Ovarian	WES	Multivariate	SA526313	0.180934	0	0.528542	0.276654	0	0	0	0.0138702	0	0	0	0
Ovarian	WES	Multivariate	SA326635	0.0196686	0	0.407898	0.158561	0	0.317064	0	0	0	0.096809	0	0
Ovarian	WES	Multivariate	SA327337	0.0772943	0	0.427714	0.417823	0	0	0	0.0771685	0	0	0	0
Ovarian	WES	Multivariate	SA327049	0.166122	0.0998639	0	0	0	0.641245	0	0.00319186	0	0.0895781	0	0
Ovarian	WES	Multivariate	SA327655	0.113024	0.141166	0	0.17551	0	0.485049	0	0	0	0.0852513	0	0
Ovarian	WES	Multivariate	SA328537	0	0.132222	0	0.34817	0	0.253243	0	0.0227745	0	0.24359	0	0
Ovarian	WES	Multivariate	SA329177	0	0.00912063	0.251493	0.59046	0	0.0943689	0	0	0	0.0545576	0	0
Ovarian	WES	Multivariate	SA328813	0	0.0493962	0	0.950604	0	0	0	0	0	0	0	0
Ovarian	WES	Multivariate	SA329243	0	0.0124278	0.377001	0.470122	0	0	0	0.140449	0	0	0	0
Ovarian	WES	Multivariate	SA330099	0	0.147033	0.226889	0.369275	0	0.210025	0	0.046777	0	0	0	0
Ovarian	WES	Multivariate	SA329573	0.0451453	0	0.613915	0.143626	0	0	0	0.126023	0	0.0712908	0	0
Ovarian	WES	Multivariate	SA330495	0.434532	0.0612521	0.499194	0	0	0	0	0.00502178	0	0	0	0
Ovarian	WES	Multivariate	SA330111	0.0584884	0.123814	0.549236	0	0	0	0	0.0172681	0	0.251194	0	0
Ovarian	WES	Multivariate	SA330969	0.194835	0.331728	0	0.397085	0	0.0151154	0	0	0	0.0612361	0	0
Ovarian	WES	Multivariate	SA331886	0.0259809	0.039043	0	0.822854	0	0	0	0	0	0.112122	0	0
Ovarian	WES	Multivariate	SA331638	0	0.0400407	0.48745	0.472509	0	0	0	0	0	0	0	0
Ovarian	WES	Multivariate	SA332126	0	0.175677	0.230262	0.594062	0	0	0	0	0	0	0	0
Ovarian	WES	Multivariate	SA326054	0.191314	0.0985282	0.235678	0.47448	0	0	0	0	0	0	0	0
Ovarian	WES	Multivariate	SA325701	0.120542	0	0	0.829341	0	0	0	0.0501165	0	0	0	0
Ovarian	WES	Multivariate	SA326324	0.56217	0	0	0.317435	0	0.0628273	0	0.0575677	0	0	0	0
Ovarian	WES	Multivariate	SA332868	0.196407	0	0.307236	0.322986	0	0	0	0.116813	0	0.0565585	0	0
Ovarian	WES	Multivariate	SA333449	0.464162	0.226734	0	0.263434	0	0	0	0.0456695	0	0	0	0
Ovarian	WES	Multivariate	SA333963	0.205474	0	0	0.717425	0	0	0	0.0771005	0	0	0	0
Ovarian	WES	Multivariate	SA333797	0.0753038	0	0.300175	0.492971	0	0	0	0.0721035	0	0.0594471	0	0
Ovarian	WES	Multivariate	SA334161	0.113625	0.0407178	0.189984	0.640555	0	0.015118	0	0	0	0	0	0
Ovarian	WES	Multivariate	SA335170	0.0657395	0.0200337	0	0.843089	0	0	0	0.0711382	0	0	0	0
Ovarian	WES	Multivariate	SA334821	0.068442	0	0.352402	0.371813	0	0	0	0.110066	0	0.097278	0	0
Ovarian	WES	Multivariate	SA389860	0.0927172	0.0415926	0	0.736044	0	0	0	0.0283865	0	0.10126	0	0
Ovarian	WES	Multivariate	SA389297	0.0670956	0	0.809015	0.0524694	0	0	0	0.0714201	0	0	0	0
Ovarian	WES	Multivariate	SA389633	0.193717	0.052554	0	0.529268	0	0.191746	0	0.032715	0	0	0	0
Ovarian	WES	Multivariate	SA388684	0.121298	0.0155045	0.237678	0.616228	0	0	0	0.00929089	0	0	0	0
Ovarian	WES	Multivariate	SA388940	0.279868	0.0742373	0.340983	0	0	0.27337	0	0.0315418	0	0	0	0
Ovarian	WES	Multivariate	SA388541	0.028073	0.0202969	0	0.65634	0	0.240663	0	0.0546273	0	0	0	0
Ovarian	WES	Multivariate	SA387646	0.211984	0.0650017	0.503027	0.219988	0	0	0	0	0	0	0	0
Ovarian	WES	Multivariate	SA520057	0.0137693	0.0219099	0.538715	0.389696	0	0	0	0.03591	0	0	0	0
Ovarian	WES	Multivariate	SA387491	0	0.0523126	0.0448214	0.896982	0	0	0	0.00588449	0	0	0	0
Ovarian	WES	Multivariate	SA386818	0	0.0253234	0.744812	0.17421	0	0	0	0	0	0.0556549	0	0
Ovarian	WES	Multivariate	SA386213	0.0357176	0	0	0.497209	0	0.335836	0	0.131237	0	0	0	0
Ovarian	WES	Multivariate	SA386069	0.0788366	0	0.316614	0.376038	0	0	0	0.228511	0	0	0	0
Ovarian	WES	Multivariate	SA384905	0.278298	0.0864859	0	0.372142	0	0.208463	0	0.0546101	0	0	0	0
Ovarian	WES	Multivariate	SA385342	0	0.0166266	0.276413	0.599998	0	0.0786968	0	0.0282655	0	0	0	0
Ovarian	WES	Multivariate	SA567401	0.31077	0	0.32337	0.251161	0	0	0	0	0	0.114699	0	0
Ovarian	WES	Multivariate	SA567374	0.081558	0	0.819884	0.00881017	0	0	0	0.0897478	0	0	0	0
Ovarian	WES	Multivariate	SA385540	0.282217	0	0.187939	0.4982	0	0	0	0.0316441	0	0	0	0
Ovarian	WES	Multivariate	SA366136	0.272119	0.11616	0.0817258	0.391289	0	0	0	0	0	0.138705	0	0
Ovarian	WES	Multivariate	SA406420	0.124728	0.0378109	0.765944	0	0	0	0	0.0715171	0	0	0	0
Ovarian	WES	Multivariate	SA406829	0	0.0228316	0.520701	0.296953	0	0.126075	0	0	0	0.03344	0	0
Ovarian	WES	Multivariate	SA330808	0.0794568	0.106508	0.358032	0	0	0.43597	0	0.0200333	0	0	0	0
Ovarian	WES	Multivariate	SA331190	0.0306264	0	0.407674	0	0	0.500932	0	0.0607677	0	0	0	0
Ovarian	WES	Multivariate	SA387562	0.0921571	0	0	0.605222	0	0.198214	0	0.0438439	0	0.0605625	0	0
Ovarian	WES	Multivariate	SA330352	0	0.0602925	0	0.510989	0	0	0.00103912	0	0	0.0202318	0.407447	0
Ovarian	WES	Multivariate	SA368859	0.160768	0	0.622601	0.101031	0	0	0	0.104878	0	0.010723	0	0
Ovarian	WES	Multivariate	SA330388	0.0707562	0.106323	0	0.812322	0	0.0105987	0	0	0	0	0	0
Ovarian	WES	Multivariate	SA387124	0.0812683	0	0.604535	0.135971	0	0	0	0.0819717	0	0.0962545	0	0
Ovarian	WES	Multivariate	SA386812	0.10373	0.0542506	0.378724	0.431242	0	0	0	0.0320541	0	0	0	0
Ovarian	WES	Multivariate	SA329729	0.080613	0.0770054	0.513934	0.273425	0	0	0	0	0	0.0550227	0	0
Ovarian	WES	Multivariate	SA329952	0.0596191	0.00719981	0	0.895246	0	0	0	0.0379351	0	0	0	0
Ovarian	WES	Multivariate	SA386134	0.0641768	0.00460281	0.736139	0.159516	0	0	0	0	0	0.0355654	0	0
Ovarian	WES	Multivariate	SA367592	0.0054182	0.00610111	0.458385	0.252871	0	0	0	0	0	0.277225	0	0
Ovarian	WES	Multivariate	SA329141	0.496883	0	0	0.201649	0	0.22862	0	0.0545881	0	0.0182591	0	0
Ovarian	WES	Multivariate	SA329256	0.684707	0	0	0	0	0.0423139	0	0	0.272979	0	0	0
Ovarian	WES	Multivariate	SA328243	0.125595	0.0239426	0	0.631017	0	0.157561	0	0.0618855	0	0	0	0
Ovarian	WES	Multivariate	SA327794	0.0984604	0	0.628887	0.111675	0	0	0	0.104013	0	0.0569646	0	0
Ovarian	WES	Multivariate	SA404222	0.250158	0.0764104	0	0.654217	0	0	0	0.0192143	0	0	0	0
Ovarian	WES	Multivariate	SA363761	0	0.0349006	0.182277	0.554607	0	0.185101	0	0.0431142	0	0	0	0
Ovarian	WES	Multivariate	SA404560	0.109531	0.0661327	0.381736	0.439382	0	0	0	0	0	0.00321797	0	0
Ovarian	WES	Multivariate	SA381946	0	0	0.406667	0.280449	0	0.040108	0	0.0858083	0	0.186968	0	0
Ovarian	WES	Multivariate	SA363983	0.0559013	0	0.0960163	0.722884	0	0	0	0.0750929	0	0.0501057	0	0
Ovarian	WES	Multivariate	SA382138	0	0.0600039	0.186874	0.753122	0	0	0	0	0	0	0	0
Ovarian	WES	Multivariate	SA403552	0.0291038	0.115545	0.450099	0.29754	0	0	0	0.107712	0	0	0	0
Ovarian	WES	Multivariate	SA403880	0.0432578	0.022196	0	0.500291	0	0.388311	0	0.045944	0	0	0	0
Ovarian	WES	Multivariate	SA363497	0.115516	0	0.439514	0	0	0.425498	0	0.0194714	0	0	0	0
Ovarian	WES	Multivariate	SA403072	0.10817	0	0.69035	0.15839	0	0	0	0	0	0.0430894	0	0
Ovarian	WES	Multivariate	SA403246	0	0.132834	0.164971	0.673123	0	0	0	0	0	0.0290717	0	0
Ovarian	WES	Multivariate	SA385090	0.11803	0	0	0.660799	0	0	0	0.221171	0	0	0	0
Ovarian	WES	Multivariate	SA327362	0.0686296	0.0235593	0.460701	0.391436	0	0	0	0	0	0.0556739	0	0
Ovarian	WES	Multivariate	SA365551	0.0740838	0.120473	0.773098	0	0	0	0	0.0323451	0	0	0	0
Ovarian	WES	Multivariate	SA326839	0.000105385	0.224293	0	0.691777	0	0	0	0	0	0.0838249	0	0
Ovarian	WES	Multivariate	SA365692	0.222375	0.0831534	0.356788	0.207808	0	0	0	0.129876	0	0	0	0
Ovarian	WES	Multivariate	SA405667	0.155752	0.0424543	0.242049	0.328294	0	0.231451	0	0	0	0	0	0
Ovarian	WES	Multivariate	SA326024	0.0106665	0	0	0.286801	0	0.389383	0	0.137696	0	0.175454	0	0
Ovarian	WES	Multivariate	SA383423	0.118579	0.0264017	0.766672	0	0	0	0	0.070136	0	0.0182108	0	0
Ovarian	WES	Multivariate	SA406135	0.0208976	0.0544677	0.0803131	0.671767	0	0	0	0	0	0.172554	0	0
Ovarian	WES	Multivariate	SA365179	0.0775183	0.0765882	0.568003	0.277891	0	0	0	0	0	0	0	0
Ovarian	WES	Multivariate	SA404794	0.0525844	0.0538491	0.370348	0.394648	0	0	0	0.12857	0	0	0	0
Ovarian	WES	Multivariate	SA382485	0.283083	0	0	0.608302	0	0.0862132	0	0.0224023	0	0	0	0
Ovarian	WES	Multivariate	SA364320	0	0.0518946	0.42099	0.333531	0	0.172843	0	0.0207407	0	0	0	0
Ovarian	WES	Multivariate	SA382791	0.276326	0.0540944	0.235401	0	0	0.392469	0	0.0417103	0	0	0	0
Ovarian	WES	Multivariate	SA405069	0.00754949	0.0883402	0.232776	0.588473	0	0	0	0.0828618	0	0	0	0
Ovarian	WES	Multivariate	SA364522	0.0945763	0	0	0.652193	0.185855	0	0	0.0161826	0	0	0	0.0511932
Ovarian	WES	Multivariate	SA325743	0	0	0.190856	0.401559	0	0.142543	0	0	0	0.265042	0	0
Ovarian	WES	Multivariate	SA376597	0.32792	0.0499317	0	0.622149	0	0	0	0	0	0	0	0
Ovarian	WES	Multivariate	SA376843	0.523708	0.0216336	0.110978	0.253566	0	0.0901146	0	0	0	0	0	0
Ovarian	WES	Multivariate	SA343776	0	0.0283941	0.637405	0.245885	0	0	0	0	0	0.088316	0	0
Ovarian	WES	Multivariate	SA344039	0.0909801	0.0270296	0.232047	0.483426	0	0.166517	0	0	0	0	0	0
Ovarian	WES	Multivariate	SA343144	0.0792597	0.0345327	0	0.78754	0	0	0	0.0986678	0	0	0	0
Ovarian	WES	Multivariate	SA343270	0.377532	0.00619973	0.616268	0	0	0	0	0	0	0	0	0
Ovarian	WES	Multivariate	SA392709	0.0421081	0.325944	0	0.631948	0	0	0	0	0	0	0	0
Ovarian	WES	Multivariate	SA345097	0.236306	0	0	0.724205	0	0	0	0.0394883	0	0	0	0
Ovarian	WES	Multivariate	SA345641	0.0407589	0	0	0	0	0	0	0	0.497229	0.0628867	0.1134	0.285725
Ovarian	WES	Multivariate	SA344261	0.263483	0.0742593	0.358663	0	0	0	0	0.166811	0	0.136784	0	0
Ovarian	WES	Multivariate	SA392978	0.0264288	0.175349	0.267443	0.235775	0	0.295004	0	0	0	0	0	0
Ovarian	WES	Multivariate	SA344563	0.251465	0.0870329	0	0.544234	0	0	0	0.117268	0	0	0	0
Ovarian	WES	Multivariate	SA344792	0.225695	0	0	0.283012	0	0.217682	0	0.0926364	0	0.180975	0	0
Ovarian	WES	Multivariate	SA335782	0.0923398	0.0162158	0.72293	0.147556	0	0	0	0.0209579	0	0	0	0
Ovarian	WES	Multivariate	SA338744	0.0806325	0.0596211	0.177815	0.573829	0	0	0	0.108103	0	0	0	0
Ovarian	WES	Multivariate	SA338684	0	0.0992439	0.285963	0.589172	0	0	0	0.0256208	0	0	0	0
Ovarian	WES	Multivariate	SA374341	0	0.0287807	0.412601	0.383838	0	0.168824	0	0.00595513	0	0	0	0
Ovarian	WES	Multivariate	SA336273	0.199311	0	0	0.566403	0	0	0	0.187698	0	0.0465877	0	0
Ovarian	WES	Multivariate	SA335889	0.0647646	0.0159174	0.579042	0.306766	0	0	0	0.0335108	0	0	0	0
Ovarian	WES	Multivariate	SA335115	0	0	0.109581	0.194584	0	0.655173	0	0.0406626	0	0	0	0
Ovarian	WES	Multivariate	SA336915	0.198843	0.115387	0	0.26568	0	0.359215	0	0	0	0.0608745	0	0
Ovarian	WES	Multivariate	SA337165	0	0.0737625	0.139551	0.392409	0	0.370626	0	0	0	0.0236517	0	0
Ovarian	WES	Multivariate	SA338052	0.368247	0	0.575923	0	0	0	0	0.05583	0	0	0	0
Ovarian	WES	Multivariate	SA337817	0.36772	0	0	0.0548629	0	0	0.405751	0	0	0	0	0.171666
Ovarian	WES	Multivariate	SA392253	0.0524691	0.0655377	0.410004	0.445921	0	0	0	0	0	0.0260679	0	0
Ovarian	WES	Multivariate	SA338256	0	0.0720829	0.412426	0.472989	0	0.0425021	0	0	0	0	0	0
Ovarian	WES	Multivariate	SA342143	0.38794	0.0780066	0.337277	0	0	0.196776	0	0	0	0	0	0
Ovarian	WES	Multivariate	SA341781	0.311516	0.133894	0	0.517279	0	0	0	0	0	0.0373112	0	0
Ovarian	WES	Multivariate	SA339462	0.584535	0.0924887	0.0981277	0.211681	0	0	0	0.0131675	0	0	0	0
Ovarian	WES	Multivariate	SA339084	0.0902872	0.0784826	0.604709	0.114769	0	0	0	0	0	0.111752	0	0
Ovarian	WES	Multivariate	SA339840	0.178062	0.0207915	0.737752	0.0478565	0	0	0	0.0155382	0	0	0	0
Ovarian	WES	Multivariate	SA339504	0.272782	0.056859	0.425123	0.169099	0	0	0	0	0	0.0761368	0	0
Ovarian	WES	Multivariate	SA340492	0	0.135039	0.0342637	0.640724	0	0.117802	0	0	0	0.0721716	0	0
Ovarian	WES	Multivariate	SA340951	0	0.0258986	0.219588	0.644714	0	0	0	0.1098	0	0	0	0
Ovarian	WES	Multivariate	SA340813	0	0.0827828	0.456461	0.190969	0	0.269787	0	0	0	0	0	0
Ovarian	WES	Multivariate	SA374533	0.0253543	0.193169	0	0.490925	0	0.191195	0	0.0993564	0	0	0	0
Ovarian	WES	Multivariate	SA334558	0.173681	0.100479	0	0.669337	0	0	0	0.0565035	0	0	0	0
Ovarian	WES	Multivariate	SA373718	0.271509	0	0.595121	0	0	0.0779587	0	0.0554117	0	0	0	0
Ovarian	WES	Multivariate	SA391527	0.0854124	0	0	0.640126	0	0.232644	0.0418167	0	0	0	0	0
Ovarian	WES	Multivariate	SA335433	0.105739	0.0081346	0.676344	0.172364	0	0	0	0	0	0.0374182	0	0
Ovarian	WES	Multivariate	SA373976	0	0.0867133	0.310462	0.184216	0	0.280997	0	0.137612	0	0	0	0
Ovarian	WES	Multivariate	SA334762	0	0.0211334	0.409388	0.400237	0	0	0	0.0316531	0	0.137589	0	0
Ovarian	WES	Multivariate	SA391965	0	0.0638526	0.223893	0.622872	0	0.0711374	0	0	0	0.0182449	0	0
Ovarian	WES	Multivariate	SA373105	0.163828	0	0	0.395478	0	0.14542	0	0.0357744	0	0.2595	0	0
Ovarian	WES	Multivariate	SA373597	0.297735	0.00763721	0.490665	0	0	0	0	0.142598	0	0.0613651	0	0
Ovarian	WES	Multivariate	SA391250	0.0147737	0.0409346	0.306422	0.332342	0	0.305528	0	0	0	0	0	0
Ovarian	WES	Multivariate	SA350910	0.296449	0.168278	0	0.403246	0	0.117127	0	0.0148997	0	0	0	0
Ovarian	WES	Multivariate	SA351474	0.051084	0	0	0.303507	0	0.242704	0	0	0.173572	0	0	0.229133
Ovarian	WES	Multivariate	SA351844	0.069388	0.0154277	0.478238	0.38207	0	0	0	0.054876	0	0	0	0
Ovarian	WES	Multivariate	SA350710	0.0154951	0	0.767612	0.144056	0	0.0220208	0	0.0508161	0	0	0	0
Ovarian	WES	Multivariate	SA348551	0	0.0626578	0.619657	0.134691	0	0.0617298	0	0	0	0.121265	0	0
Ovarian	WES	Multivariate	SA349139	0.0169341	0.123049	0.275286	0.584731	0	0	0	0	0	0	0	0
Ovarian	WES	Multivariate	SA348294	0.131045	0	0.351651	0.324736	0	0	0	0.0440834	0	0.148484	0	0
Ovarian	WES	Multivariate	SA394074	0	0.0293081	0.552746	0.345182	0	0.0721664	0	0	0	0.000597721	0	0
Ovarian	WES	Multivariate	SA336801	0.365944	0.15208	0	0.324386	0	0.14081	0	0.0167816	0	0	0	0
Ovarian	WES	Multivariate	SA349726	0	0.0224089	0	0.66955	0	0.173979	0	0.040529	0	0.0935331	0	0
Ovarian	WES	Multivariate	SA350015	0	0.00636362	0.778235	0.215401	0	0	0	0	0	0	0	0
Ovarian	WES	Multivariate	SA350231	0.113873	0.178967	0	0.579867	0	0.0193477	0	0	0	0.107945	0	0
Ovarian	WES	Multivariate	SA337029	0.0531367	0	0.482884	0.333076	0	0	0	0.101541	0	0.0293628	0	0
Ovarian	WES	Multivariate	SA346375	0	0.044121	0.29815	0.354664	0	0.232973	0	0.0700919	0	0	0	0
Ovarian	WES	Multivariate	SA346711	0.224608	0.0896435	0.555213	0	0	0.104654	0	0.0258819	0	0	0	0
Ovarian	WES	Multivariate	SA345994	0.23429	0.0745026	0.584256	0	0	0.106951	0	0	0	0	0	0
Ovarian	WES	Multivariate	SA393378	0	0.0341588	0.635677	0.172432	0	0	0	0	0	0.157732	0	0
Ovarian	WES	Multivariate	SA375685	0	0.0438591	0.604366	0	0	0.182696	0	0.0216284	0	0.147451	0	0
Ovarian	WES	Multivariate	SA336112	0.11932	0	0.243641	0.219573	0	0.377493	0	0.0399736	0	0	0	0
Ovarian	WES	Multivariate	SA347658	0.216131	0.00104731	0	0.659546	0	0	0	0.123276	0	0	0	0
Ovarian	WES	Multivariate	SA347987	0.266045	0.137033	0.0232317	0	0	0.467239	0	0	0	0.106452	0	0
Ovarian	WES	Multivariate	SA346999	0.0791127	0.0210846	0.483377	0.406486	0	0	0	0.0099393	0	0	0	0
Ovarian	WES	Multivariate	SA372979	0	0.0843179	0.388219	0.4397	0	0	0	0.0667223	0	0.021041	0	0
Ovarian	WES	Multivariate	SA332079	0	0	0.46434	0.534506	0	0	0	0	0	0.00115368	0	0
Ovarian	WES	Multivariate	SA371036	0.154879	0.0381435	0.416376	0.255191	0	0.135411	0	0	0	0	0	0
Ovarian	WES	Multivariate	SA389237	0.229197	0.00615852	0.592226	0.0771465	0	0.0952718	0	0	0	0	0	0
Ovarian	WES	Multivariate	SA371234	0.491412	0	0.483718	0	0	0	0	0	0	0.0248702	0	0
Ovarian	WES	Multivariate	SA371504	0.0532601	0.0483423	0.213902	0.592965	0	0	0	0	0	0.09153	0	0
Ovarian	WES	Multivariate	SA389627	0.362941	0	0.161785	0.385714	0	0.0767953	0	0	0	0.012764	0	0
Ovarian	WES	Multivariate	SA332519	0.258286	0	0.189493	0.0706413	0	0.380377	0	0.101203	0	0	0	0
Ovarian	WES	Multivariate	SA388813	0.0293021	0	0.338421	0.513277	0	0.0536953	0	0.0653043	0	0	0	0
Ovarian	WES	Multivariate	SA331740	0.052349	0.0539925	0.62483	0.192059	0	0.076769	0	0	0	0	0	0
Ovarian	WES	Multivariate	SA370265	0.0132017	0.109356	0	0.876952	0	0	0	0.000490336	0	0	0	0
Ovarian	WES	Multivariate	SA370814	0.198634	0	0	0.68674	0	0.0218766	0	0.0927495	0	0	0	0
Ovarian	WES	Multivariate	SA389099	0.0458654	0	0.888131	0	0	0	0	0.0660032	0	0	0	0
Ovarian	WES	Multivariate	SA369611	0	0.0726903	0.215191	0.489836	0	0.160512	0	0	0	0.0617708	0	0
Ovarian	WES	Multivariate	SA369761	0.0754701	0	0	0.704334	0	0	0	0.15231	0	0.0678854	0	0
Ovarian	WES	Multivariate	SA388168	0.49143	0	0.50857	0	0	0	0	0	0	0	0	0
Ovarian	WES	Multivariate	SA388451	0.118277	0.0506787	0.57038	0	0	0.13232	0	0	0	0.128345	0	0
Ovarian	WES	Multivariate	SA333874	0.216055	0.0696334	0	0.531571	0	0	0	0.0160696	0	0.166671	0	0
Ovarian	WES	Multivariate	SA334114	0.0945938	0.0171498	0.0987642	0.783236	0	0	0	0	0	0.0062564	0	0
Ovarian	WES	Multivariate	SA372769	0.128974	0	0.19997	0.395292	0	0.174294	0	0.101471	0	0	0	0
Ovarian	WES	Multivariate	SA333318	0	0.0498655	0.420331	0.517732	0	0	0	0.0120716	0	0	0	0
Ovarian	WES	Multivariate	SA391096	0.0719168	0.0267137	0.627484	0.273886	0	0	0	0	0	0	0	0
Ovarian	WES	Multivariate	SA390682	0.0574302	0.0628575	0	0.728123	0	0	0	0.0688778	0	0.0827112	0	0
Ovarian	WES	Multivariate	SA389783	0	0.0218599	0.354058	0.542415	0	0	0	0.0816678	0	0	0	0
Ovarian	WES	Multivariate	SA372166	0.0810316	0.153129	0.380686	0.3593	0	0	0	0.0258537	0	0	0	0
Ovarian	WES	Multivariate	SA390010	0	0.0443475	0.562236	0.293305	0	0	0	0	0	0.100111	0	0
Ovarian	WES	Multivariate	SA372418	0	0.00519677	0.283188	0.180838	0	0	0	0.0259831	0	0.504793	0	0
Ovarian	WES	Multivariate	SA333036	0.00871456	0	0.455478	0.437838	0	0	0	0.0226752	0	0.0752934	0	0
Ovarian	WES	Multivariate	SA357027	0	0	0.737026	0.159258	0	0.0501732	0	0	0	0.0535432	0	0
Ovarian	WES	Multivariate	SA518759	0.043625	0.0268506	0.88763	0	0	0.0354191	0	0.00647486	0	0	0	0
Ovarian	WES	Multivariate	SA357363	0.121921	0	0	0.863296	0	0	0	0.0147831	0	0	0	0
Ovarian	WES	Multivariate	SA356348	0.102137	0.101162	0	0.507347	0	0	0	0.107298	0	0.182057	0	0
Ovarian	WES	Multivariate	SA356483	0.349448	0	0.605869	0	0	0	0	0.0446833	0	0	0	0
Ovarian	WES	Multivariate	SA395348	0.227734	0.0796826	0.644564	0	0	0	0	0.0480198	0	0	0	0
Ovarian	WES	Multivariate	SA394784	0.224522	0.0234063	0.23548	0.516592	0	0	0	0	0	0	0	0
Ovarian	WES	Multivariate	SA355108	0.388293	0.132213	0.197133	0	0	0.261096	0	0.0212655	0	0	0	0
Ovarian	WES	Multivariate	SA355504	0	0	0.319432	0.231394	0	0.122652	0	0.15484	0	0.171682	0	0
Ovarian	WES	Multivariate	SA394254	0.0855428	0.0816552	0.349113	0.430994	0	0	0	0.0526953	0	0	0	0
Ovarian	WES	Multivariate	SA394595	0	0.0810135	0.423237	0.338445	0	0.134876	0	0.0224282	0	0	0	0
Ovarian	WES	Multivariate	SA393702	0.049996	0.0544076	0.12049	0.338477	0	0.436629	0	0	0	0	0	0
Ovarian	WES	Multivariate	SA393324	0.0645636	0.00545802	0.482703	0	0	0.395308	0	0	0	0.0519675	0	0
Ovarian	WES	Multivariate	SA392337	0.00200192	0.275446	0	0.722552	0	0	0	0	0	0	0	0
Ovarian	WES	Multivariate	SA392007	0	0.0400808	0.358925	0.337941	0	0	0	0.0916382	0	0.171416	0	0
Ovarian	WES	Multivariate	SA391304	0	0	0	0	0	1	0	0	0	0	0	0
Ovarian	WES	Multivariate	SA391575	0.0548048	0.0666455	0.246168	0.563168	0	0	0	0.0692141	0	0	0	0
Ovarian	WES	Multivariate	SA390850	0.22532	0.0251468	0.676516	0.0498434	0	0	0	0.0231737	0	0	0	0
Ovarian	WES	Multivariate	SA391054	0.0770747	0	0.758453	0.164472	0	0	0	0	0	0	0	0
Ovarian	WES	Multivariate	SA400469	0.496988	0.014383	0	0.268267	0	0.180581	0	0	0	0.0397798	0	0
Ovarian	WES	Multivariate	SA400871	0.0846002	0.0738495	0	0.672601	0	0.112992	0	0.0559575	0	0	0	0
Ovarian	WES	Multivariate	SA399936	0	0	0.114824	0.740985	0	0.0140719	0	0.116448	0	0.0136717	0	0
Ovarian	WES	Multivariate	SA400266	0.0910336	0	0.5746	0	0	0.334367	0	0	0	0	0	0
Ovarian	WES	Multivariate	SA362402	0.0489722	0.0398187	0.405681	0.486271	0	0	0	0.0192563	0	0	0	0
Ovarian	WES	Multivariate	SA363013	0.347339	0.0112179	0.0501264	0.5797	0	0	0	0	0	0.0116174	0	0
Ovarian	WES	Multivariate	SA402310	0.577311	0.0805597	0	0.282638	0	0	0	0	0	0.0594911	0	0
Ovarian	WES	Multivariate	SA361868	0	0.0221243	0	0.141478	0	0	0	0.089865	0	0.746533	0	0
Ovarian	WES	Multivariate	SA402662	0.11401	0.0375429	0.538705	0.235287	0	0	0	0.0744553	0	0	0	0
Ovarian	WES	Multivariate	SA362180	0.16841	0.144225	0.65318	0	0	0	0	0.0341845	0	0	0	0
Ovarian	WES	Multivariate	SA401752	0.0615922	0	0.256756	0.466333	0	0	0	0.103375	0	0.111944	0	0
Ovarian	WES	Multivariate	SA361222	0.513364	0.112812	0	0.117387	0	0	0	0.0202206	0	0.236217	0	0
Ovarian	WES	Multivariate	SA401992	0.293216	0	0	0.431358	0	0.209136	0	0.0166021	0	0.0496886	0	0
Ovarian	WES	Multivariate	SA361624	0	0	0.504978	0.479945	0	0	0	0.0150768	0	0	0	0
Ovarian	WES	Multivariate	SA401296	0.123973	0	0	0.83736	0	0	0	0.00624005	0	0.0324265	0	0
Ovarian	WES	Multivariate	SA360662	0.0545983	0.165098	0	0.780304	0	0	0	0	0	0	0	0
Ovarian	WES	Multivariate	SA360964	0.446106	0.0114152	0.232675	0.309804	0	0	0	0	0	0	0	0
Ovarian	WES	Multivariate	SA359502	0.141278	0.165981	0.416908	0	0	0	0	0.10572	0	0.170113	0	0
Ovarian	WES	Multivariate	SA360196	0.194528	0.0775374	0.395388	0.220237	0	0	0	0.112309	0	0	0	0
Ovarian	WES	Multivariate	SA396530	0	0	0.217956	0.492412	0	0.246373	0	0.0432581	0	0	0	0
Ovarian	WES	Multivariate	SA396716	0	0.0678416	0.17361	0.517008	0	0	0	0.0546317	0	0.186908	0	0
Ovarian	WES	Multivariate	SA399450	0	0.259083	0.178462	0.363965	0	0.19849	0	0	0	0	0	0
Ovarian	WES	Multivariate	SA359298	0.165979	0.0317109	0	0.621038	0	0	0	0.0362479	0	0.145024	0	0
Ovarian	WES	Multivariate	SA398532	0.166416	0.0806325	0.275837	0	0	0.222557	0	0	0	0.254558	0	0
Ovarian	WES	Multivariate	SA358475	0.0397802	0.0482898	0.901189	0	0	0	0	0	0	0.0107406	0	0
Ovarian	WES	Multivariate	SA399007	0	0.00312115	0.8756	0.121278	0	0	0	0	0	0	0	0
Ovarian	WES	Multivariate	SA358718	0.0255156	0.0588644	0.500435	0	0	0.266872	0	0.148313	0	0	0	0
Ovarian	WES	Multivariate	SA398017	0.155891	0.0425347	0	0.786652	0	0	0	0.0149229	0	0	0	0
Ovarian	WES	Multivariate	SA398167	0.145297	0.0290388	0.356666	0	0	0.383008	0	0	0	0.0859912	0	0
Ovarian	WES	Multivariate	SA358172	0	0.256201	0	0.743799	0	0	0	0	0	0	0	0
Ovarian	WES	Multivariate	SA397376	0.031356	0	0	0.56867	0	0.315604	0	0	0	0.0843703	0	0
Ovarian	WES	Multivariate	SA397219	0	0.0643909	0.154792	0.780818	0	0	0	0	0	0	0	0
Ovarian	WES	Multivariate	SA397795	0.0368023	0.0211145	0.791078	0.0805377	0	0	0	0.0704677	0	0	0	0
Ovarian	WES	Multivariate	SA357519	0.110577	0.0679722	0.699565	0.121886	0	0	0	0	0	0	0	0
Ovarian	WES	Multivariate	SA373051	0.143818	0	0	0.628083	0	0.0606864	0	0.136546	0	0.0308655	0	0
Ovarian	WES	Multivariate	SA373298	0	0	0.859571	0.0804404	0	0.0569067	0	0.00308213	0	0	0	0
Ovarian	WES	Multivariate	SA375181	0.106513	0.160362	0.579903	0	0	0.143574	0	0.00964752	0	0	0	0
Ovarian	WES	Multivariate	SA374486	0.172949	0.0582187	0.621787	0.0970474	0	0	0	0.0499977	0	0	0	0
Ovarian	WES	Multivariate	SA373705	0.0721421	0.086684	0.56354	0.0668694	0	0.210765	0	0	0	0	0	0
Ovarian	WES	Multivariate	SA373939	0.0215464	0	0.480637	0.436278	0	0	0	0.0290118	0	0.0325271	0	0
Ovarian	WES	Multivariate	SA374107	0.257717	0	0	0	0	0	0.142067	0.0576719	0.265989	0	0	0.276555
Ovarian	WES	Multivariate	SA372871	0.154001	0.0892929	0.244905	0	0	0	0.0238826	0	0	0	0	0.487918
Ovarian	WES	Multivariate	SA322842	0.664816	0	0.11498	0	0	0.220204	0	0	0	0	0	0
Ovarian	WES	Multivariate	SA352174	0.0311227	0.182959	0	0.671125	0	0	0	0.0337234	0	0.0810698	0	0
Ovarian	WES	Multivariate	SA323224	0	0.118791	0.341872	0.304848	0	0.192961	0	0	0	0.0415276	0	0
Ovarian	WES	Multivariate	SA354037	0.0805751	0.214223	0.0745843	0.564794	0	0	0	0	0	0.0658227	0	0
Ovarian	WES	Multivariate	SA372652	0.035344	0.0311476	0.344016	0	0	0.553974	0	0	0	0.0355186	0	0
Ovarian	WES	Multivariate	SA354504	0.128624	0	0.652678	0.12344	0	0	0	0.0897799	0	0.00547815	0	0
Ovarian	WES	Multivariate	SA371307	0.0136152	0.0358902	0.922306	0	0	0	0	0	0	0.0281882	0	0
Ovarian	WES	Multivariate	SA324905	0	0	0	0.39726	0	0	0.14411	0.0396517	0	0.128877	0.290102	0
Ovarian	WES	Multivariate	SA371397	0.157063	0.176564	0.487645	0	0	0	0	0.0373675	0	0.141361	0	0
Ovarian	WES	Multivariate	SA353898	0.0618	0.0643219	0.554108	0.27987	0	0	0	0.0399003	0	0	0	0
Ovarian	WES	Multivariate	SA323889	0.333293	0.139229	0.00623278	0.496585	0	0	0	0.0246599	0	0	0	0
Ovarian	WES	Multivariate	SA370736	0.957336	0	0	0	0	0	0	0.00670088	0.0359636	0	0	0
Ovarian	WES	Multivariate	SA324168	0	0.0724444	0.1156	0.620794	0	0.0974768	0	0.0936843	0	0	0	0
Ovarian	WES	Multivariate	SA371018	0	0.141482	0.424062	0.384587	0	0	0	0.0498688	0	0	0	0
Ovarian	WES	Multivariate	SA352467	0.185967	0.0221611	0.681095	0.100331	0	0	0	0.0104459	0	0	0	0
Ovarian	WES	Multivariate	SA323469	0.13953	0.131173	0	0.473328	0	0	0	0.25597	0	0	0	0
Ovarian	WES	Multivariate	SA323589	0.0110913	0.0419638	0.0118012	0.935144	0	0	0	0	0	0	0	0
Ovarian	WES	Multivariate	SA370283	0.0139757	0.082866	0	0.638275	0	0.166537	0	0.0983463	0	0	0	0
Ovarian	WES	Multivariate	SA352719	0.169978	0	0.100546	0.516374	0	0	0	0.213103	0	0	0	0
Ovarian	WES	Multivariate	SA369839	0	0.108889	0.130617	0.422097	0	0.294055	0	0.0443407	0	0	0	0
Ovarian	WES	Multivariate	SA369192	0	0.0370976	0.331906	0.445023	0	0.173799	0	0	0	0.0121742	0	0
Ovarian	WES	Multivariate	SA351570	0.0474294	0.0320787	0.462759	0.396758	0	0.0609751	0	0	0	0	0	0
Ovarian	WES	Multivariate	SA380321	0.239917	0.0185293	0.535193	0	0	0.199535	0	0.00682536	0	0	0	0
Ovarian	WES	Multivariate	SA379683	0	0	0	0	0	0	0	0	0	1	0	0
Ovarian	WES	Multivariate	SA379899	0.450698	0.0358775	0.122708	0	0	0	0	0	0	0.390717	0	0
Ovarian	WES	Multivariate	SA379017	0.0238166	0.0672013	0	0.283841	0	0.545586	0	0.079555	0	0	0	0
Ovarian	WES	Multivariate	SA379401	0.0537765	0.0245649	0.35214	0.513445	0	0	0	0.0560741	0	0	0	0
Ovarian	WES	Multivariate	SA381382	0.0259547	0.0331263	0.637934	0.235079	0	0	0	0	0	0.0679061	0	0
Ovarian	WES	Multivariate	SA381802	0.249416	0.0444908	0.510424	0	0	0	0	0.0174011	0	0.178269	0	0
Ovarian	WES	Multivariate	SA376099	0.231456	0	0	0.475039	0	0	0	0.136314	0	0.157191	0	0
Ovarian	WES	Multivariate	SA376411	0	0.213093	0.310824	0.403008	0	0.0212947	0	0	0	0.0517798	0	0
Ovarian	WES	Multivariate	SA378975	0	0.0257319	0	0	0	0.974268	0	0	0	0	0	0
Ovarian	WES	Multivariate	SA377959	0.0980199	0.0489321	0.458972	0.355804	0	0	0	0	0	0.0382715	0	0
Ovarian	WES	Multivariate	SA378307	0.873716	0.126284	0	0	0	0	0	0	0	0	0	0
Ovarian	WES	Multivariate	SA377412	0	0.104374	0	0.865284	0	0	0	0	0	0.0303422	0	0
Ovarian	WES	Multivariate	SA377647	0.41882	0.0078029	0	0.276781	0	0.237136	0	0.0594598	0	0	0	0
Ovarian	WES	Multivariate	SA383299	0.126035	0.0153421	0.642711	0.146402	0	0	0	0	0	0.0695099	0	0
Ovarian	WES	Multivariate	SA360800	0	0	0.146014	0	0	0	0	0	0	0	0	0.853986
Ovarian	WES	Multivariate	SA343997	0	0.0071746	0.355109	0.169884	0	0.162382	0	0	0	0.305451	0	0
Ovarian	WES	Multivariate	SA401075	0.508594	0.0311478	0.172481	0.282308	0	0	0	0	0	0.00546955	0	0
Ovarian	WES	Multivariate	SA383462	0	0.033631	0.560545	0.242826	0	0.129795	0	0.0332025	0	0	0	0
Ovarian	WES	Multivariate	SA344509	0	0.0486571	0.49988	0.392865	0	0	0	0.058598	0	0	0	0
Ovarian	WES	Multivariate	SA401122	0.270036	0	0.473059	0.0922793	0	0.123744	0	0.0408822	0	0	0	0
Ovarian	WES	Multivariate	SA382785	0.3743	0	0.036577	0.507001	0	0	0	0.0821224	0	0	0	0
Ovarian	WES	Multivariate	SA343588	0.254299	0.0108735	0	0.734827	0	0	0	0	0	0	0	0
Ovarian	WES	Multivariate	SA400433	0	0.143198	0	0.733418	0	0	0	0.0213411	0	0.102043	0	0
Ovarian	WES	Multivariate	SA383131	0	0.289265	0	0.710735	0	0	0	0	0	0	0	0
Ovarian	WES	Multivariate	SA400535	0.162472	0	0.245365	0.288815	0	0.180711	0	0	0	0.122637	0	0
Ovarian	WES	Multivariate	SA382156	0.271484	0.0804415	0	0.379615	0	0.229767	0	0.0386926	0	0	0	0
Ovarian	WES	Multivariate	SA381772	0.0361438	0.0342108	0.768532	0	0	0.161114	0	0	0	0	0	0
Ovarian	WES	Multivariate	SA359680	0.244207	0.00389791	0.705905	0	0	0.0371372	0	0.0088527	0	0	0	0
Ovarian	WES	Multivariate	SA359262	0	0	0.039225	0.177835	0	0.0524778	0	0.117316	0	0.613145	0	0
Ovarian	WES	Multivariate	SA399834	0.0975577	0.0178511	0.49385	0.379185	0	0	0	0	0	0.0115557	0	0
Ovarian	WES	Multivariate	SA342784	0.176411	0	0.268076	0.286518	0	0	0	0.181288	0	0.0877064	0	0
Ovarian	WES	Multivariate	SA359878	0	0.0683994	0.295232	0.323612	0	0	0	0.105986	0	0.20677	0	0
Ovarian	WES	Multivariate	SA343108	0.0957704	0.030672	0.289579	0.502135	0	0	0	0.0818431	0	0	0	0
Ovarian	WES	Multivariate	SA381676	0.298053	0.055899	0	0.334441	0	0.194856	0	0.116752	0	0	0	0
Ovarian	WES	Multivariate	SA399150	0	0.0134184	0.628392	0.121098	0	0	0	0.0192034	0	0.217887	0	0
Ovarian	WES	Multivariate	SA358632	0	0.0146184	0.317791	0.134856	0	0.267797	0	0	0	0.264939	0	0
Ovarian	WES	Multivariate	SA342382	0.0765698	0.0430946	0.308165	0.363675	0	0	0	0	0	0.208496	0	0
Ovarian	WES	Multivariate	SA342772	0	0.0300207	0.512657	0.420009	0	0.0373127	0	0	0	0	0	0
Ovarian	WES	Multivariate	SA357603	0.284406	0.0397194	0.620764	0	0	0	0	0.0551104	0	0	0	0
Ovarian	WES	Multivariate	SA341616	0.26541	0	0.289388	0.363739	0	0	0	0.0814632	0	0	0	0
Ovarian	WES	Multivariate	SA357862	0.226933	0.100946	0.0323098	0.399611	0	0	0	0	0	0.2402	0	0
Ovarian	WES	Multivariate	SA398659	0.00147779	0	0.227758	0.552362	0	0	0	0.0777073	0	0.140696	0	0
Ovarian	WES	Multivariate	SA358034	0.526694	0	0.473306	0	0	0	0	0	0	0	0	0
Ovarian	WES	Multivariate	SA342021	0.229643	0.0415254	0.469614	0.145529	0	0	0	0.113689	0	0	0	0
Ovarian	WES	Multivariate	SA398910	0.0885711	0.0664801	0.634889	0.00609618	0	0.203964	0	0	0	0	0	0
Ovarian	WES	Multivariate	SA380339	0.10395	0.0103312	0	0.287007	0	0.338674	0	0	0	0.260037	0	0
Ovarian	WES	Multivariate	SA518877	0	0.220681	0	0.779319	0	0	0	0	0	0	0	0
Ovarian	WES	Multivariate	SA397999	0.344875	0.0537092	0.45475	0.142521	0	0	0	0	0	0.00414494	0	0
Ovarian	WES	Multivariate	SA380729	0.0785924	0.0553964	0.506294	0	0	0.30338	0	0.0563367	0	0	0	0
Ovarian	WES	Multivariate	SA357459	0.15868	0.00455402	0.382909	0.229884	0	0	0	0	0	0.223973	0	0
Ovarian	WES	Multivariate	SA398485	0.0321044	0.0699277	0.436166	0.39403	0	0	0	0	0	0.0677713	0	0
Ovarian	WES	Multivariate	SA360394	0.186463	0.113326	0.37534	0.3178	0	0	0	0.00707055	0	0	0	0
Ovarian	WES	Multivariate	SA380049	0.16615	0.0113462	0.623162	0.199342	0	0	0	0	0	0	0	0
Ovarian	WES	Multivariate	SA340724	0.068846	0	0.206348	0.278054	0	0.399416	0	0.0473363	0	0	0	0
Ovarian	WES	Multivariate	SA397849	0.31584	0.177124	0	0.373614	0	0.110405	0	0.0230173	0	0	0	0
Ovarian	WES	Multivariate	SA379371	0	0.14967	0.205733	0.547522	0	0.00366611	0	0	0	0.0934088	0	0
Ovarian	WES	Multivariate	SA397141	0.0786016	0.0896052	0.146766	0.662413	0	0	0	0.0226142	0	0	0	0
Ovarian	WES	Multivariate	SA355384	0.0639636	0.0267073	0.57692	0.302357	0	0	0	0.0300518	0	0	0	0
Ovarian	WES	Multivariate	SA355078	0.403413	0	0.537505	0.0590825	0	0	0	0	0	0	0	0
Ovarian	WES	Multivariate	SA355481	0.549399	0	0.302021	0	0	0	0	0	0	0.14858	0	0
Ovarian	WES	Multivariate	SA396686	0.0387315	0	0.699359	0.220381	0	0	0	0.0415284	0	0	0	0
Ovarian	WES	Multivariate	SA378289	0	0.0282829	0.43979	0.399438	0	0	0	0.132489	0	0	0	0
Ovarian	WES	Multivariate	SA353683	0.489412	0.110579	0.400009	0	0	0	0	0	0	0	0	0
Ovarian	WES	Multivariate	SA338559	0.386055	0.0652943	0.548651	0	0	0	0	0	0	0	0	0
Ovarian	WES	Multivariate	SA354719	0.219205	0.00863476	0.632731	0	0	0.13563	0	0.00379945	0	0	0	0
Ovarian	WES	Multivariate	SA378433	0	0.0553895	0.295836	0.420803	0	0.175116	0	0.0528561	0	0	0	0
Ovarian	WES	Multivariate	SA395918	0.201533	0	0.391345	0.211099	0	0	0	0.0512392	0	0.144784	0	0
Ovarian	WES	Multivariate	SA338924	0.0714629	0.0513361	0.590675	0.221293	0	0	0	0	0	0.065233	0	0
Ovarian	WES	Multivariate	SA338034	0.0847889	0.0302156	0.603535	0.205537	0	0	0	0	0	0.0759229	0	0
Ovarian	WES	Multivariate	SA352018	0.12024	0	0.350413	0.489988	0	0.0393597	0	0	0	0	0	0
Ovarian	WES	Multivariate	SA352294	0	0.0440687	0.187925	0.371109	0	0.297456	0	0.0994419	0	0	0	0
Ovarian	WES	Multivariate	SA352671	0.619691	0.0766422	0.0133246	0	0	0.290342	0	0	0	0	0	0
Ovarian	WES	Multivariate	SA394995	0.031739	0.0216529	0.479852	0.313565	0	0	0	0.153191	0	0	0	0
Ovarian	WES	Multivariate	SA378007	0.179125	0.0585012	0.72006	0	0	0	0	0.00740186	0	0.0349111	0	0
Ovarian	WES	Multivariate	SA352953	0.0336956	0.0532342	0.398782	0.384549	0	0.12974	0	0	0	0	0	0
Ovarian	WES	Multivariate	SA353446	0.0262496	0.0911031	0.219198	0.576277	0	0	0	0	0	0.0871724	0	0
Ovarian	WES	Multivariate	SA394560	0.135841	0.0466982	0.15863	0.513664	0	0	0	0	0	0.145167	0	0
Ovarian	WES	Multivariate	SA356657	0.0746464	0	0.755344	0	0	0	0	0	0	0.170009	0	0
Ovarian	WES	Multivariate	SA355796	0.0937096	0.0626138	0.843677	0	0	0	0	0	0	0	0	0
Ovarian	WES	Multivariate	SA356294	0.161604	0.0452277	0.38408	0.268966	0	0	0	0	0	0.140123	0	0
Ovarian	WES	Multivariate	SA340012	0.114514	0.0408543	0.599083	0.137523	0	0.108025	0	0	0	0	0	0
Ovarian	WES	Multivariate	SA406051	0.071162	0	0.560236	0.26475	0	0.0366473	0	0	0	0.0672051	0	0
Ovarian	WES	Multivariate	SA368415	0.0521009	0.0146103	0.233321	0.682158	0	0	0	0.0178099	0	0	0	0
Ovarian	WES	Multivariate	SA350821	0.0757786	0.077148	0.237739	0.561751	0	0	0	0.0475832	0	0	0	0
Ovarian	WES	Multivariate	SA322347	0.0590059	0.0424925	0.784928	0	0	0.0790504	0	0.0345231	0	0	0	0
Ovarian	WES	Multivariate	SA368864	0.115838	0	0.322227	0.457852	0	0	0	0.0858626	0	0.0182199	0	0
Ovarian	WES	Multivariate	SA368571	0.346813	0.0188396	0	0.6009	0	0	0	0.018587	0	0.01486	0	0
Ovarian	WES	Multivariate	SA351078	0.0570935	0.0762669	0.631338	0.229264	0	0	0	0.00603791	0	0	0	0
Ovarian	WES	Multivariate	SA321448	0.10278	0	0.159344	0.587021	0	0	0	0.150856	0	0	0	0
Ovarian	WES	Multivariate	SA322030	0	0.0942923	0.121031	0	0	0.589954	0	0.00301345	0	0.191709	0	0
Ovarian	WES	Multivariate	SA350590	0.198489	0	0.320185	0.339035	0	0	0	0.0345015	0	0.107789	0	0
Ovarian	WES	Multivariate	SA321707	0	0	0.0313408	0.714514	0	0	0	0.0664149	0	0.187731	0	0
Ovarian	WES	Multivariate	SA368223	0.149445	0.0840443	0.477233	0.16262	0	0	0	0	0	0.126658	0	0
Ovarian	WES	Multivariate	SA406949	0.332894	0	0.317728	0	0	0.231283	0	0.0402013	0	0.0778936	0	0
Ovarian	WES	Multivariate	SA407123	0	0.170317	0.0981573	0.566397	0	0.157047	0	0	0	0.00808155	0	0
Ovarian	WES	Multivariate	SA367514	0	0.0585998	0.532008	0.249077	0	0.10786	0	0	0	0.0524539	0	0
Ovarian	WES	Multivariate	SA350009	0.0608016	0.0753732	0.378826	0.304283	0	0.180717	0	0	0	0	0	0
Ovarian	WES	Multivariate	SA349193	0.189782	0.0610432	0.194171	0.445455	0	0	0	0.109549	0	0	0	0
Ovarian	WES	Multivariate	SA406159	0.084666	0.112965	0	0.349464	0	0.312726	0	0.140178	0	0	0	0
Ovarian	WES	Multivariate	SA349517	0.083922	0	0	0.55806	0	0.276176	0	0.0413148	0	0.0405268	0	0
Ovarian	WES	Multivariate	SA366932	0	0	0.0421003	0.509324	0	0.268708	0	0.129375	0	0.0504929	0	0
Ovarian	WES	Multivariate	SA366281	0.0692234	0	0	0.414141	0	0.180531	0	0	0	0.336105	0	0
Ovarian	WES	Multivariate	SA405781	0.28035	0.0393947	0.655198	0	0	0	0	0.0250575	0	0	0	0
Ovarian	WES	Multivariate	SA366034	0.176429	0	0	0.510664	0	0	0	0.0236068	0	0.289301	0	0
Ovarian	WES	Multivariate	SA404757	0.0244919	0	0	0.670643	0	0.304865	0	0	0	0	0	0
Ovarian	WES	Multivariate	SA347519	0.0551851	0	0.361814	0.427005	0	0	0	0.137536	0	0.0184598	0	0
Ovarian	WES	Multivariate	SA404470	0	0.0556184	0.375553	0.430714	0	0.123189	0	0	0	0.0149249	0	0
Ovarian	WES	Multivariate	SA364888	0.0562862	0	0.332146	0.314935	0	0	0	0.0422885	0	0.254345	0	0
Ovarian	WES	Multivariate	SA405152	0.21168	0.0575389	0	0.602421	0	0	0	0.0470686	0	0.0812918	0	0
Ovarian	WES	Multivariate	SA403953	0.123458	0.0688947	0.465752	0.341895	0	0	0	0	0	0	0	0
Ovarian	WES	Multivariate	SA364333	0.225956	0.0362725	0.140671	0.492199	0	0	0	0.104902	0	0	0	0
Ovarian	WES	Multivariate	SA404270	0	0	0.356356	0.399637	0	0.190151	0	0.0399684	0	0.0138883	0	0
Ovarian	WES	Multivariate	SA364455	0.35665	0.0679852	0	0.218829	0	0.255109	0	0.101427	0	0	0	0
Ovarian	WES	Multivariate	SA403646	0.12867	0	0.124139	0.747191	0	0	0	0	0	0	0	0
Ovarian	WES	Multivariate	SA346855	0.111626	0	0.346227	0.386512	0	0	0	0.0566276	0	0.0990084	0	0
Ovarian	WES	Multivariate	SA403204	0.235859	0	0.603399	0.113976	0	0	0	0.00408647	0	0.0426797	0	0
Ovarian	WES	Multivariate	SA364008	0	0.0501207	0.345546	0.604333	0	0	0	0	0	0	0	0
Ovarian	WES	Multivariate	SA363527	0.214551	0.0229208	0.418888	0.252861	0	0	0	0.0907793	0	0	0	0
Ovarian	WES	Multivariate	SA363019	0.0326757	0	0.44818	0.279222	0	0	0	0.239923	0	0	0	0
Ovarian	WES	Multivariate	SA402902	0.21338	0	0	0.509856	0	0	0	0.0191659	0.0599144	0	0	0.197683
Ovarian	WES	Multivariate	SA346207	0.0738847	0.222206	0.513758	0	0	0.118343	0	0.0718086	0	0	0	0
Ovarian	WES	Multivariate	SA345497	0	0.106627	0	0.893373	0	0	0	0	0	0	0	0
Ovarian	WES	Multivariate	SA362396	0.137221	0.135659	0	0.35191	0	0	0	0.0854543	0	0.289756	0	0
Ovarian	WES	Multivariate	SA402596	0.14955	0.0142663	0.486025	0	0	0.229338	0	0.120821	0	0	0	0
Ovarian	WES	Multivariate	SA345695	0	0	0.378338	0.412417	0	0.209246	0	0	0	0	0	0
Ovarian	WES	Multivariate	SA361366	0	0.12519	0.406632	0.443671	0	0	0	0.0245064	0	0	0	0
Ovarian	WES	Multivariate	SA344545	0.211113	0.100795	0.283641	0.404451	0	0	0	0	0	0	0	0
Ovarian	WES	Multivariate	SA401686	0.0147578	0	0.0805213	0.536204	0	0.257937	0	0.110579	0	0	0	0
Ovarian	WES	Multivariate	SA361684	0.699729	0	0.300271	0	0	0	0	0	0	0	0	0
Ovarian	WES	Multivariate	SA345175	0	0.0408863	0.281029	0.35518	0	0	0	0.0694215	0	0.253484	0	0
Ovarian	WES	Multivariate	SA362324	0.253613	0.14934	0	0.300317	0	0.285283	0	0.0114476	0	0	0	0
Ovarian	WES	Multivariate	SA402112	0.180498	0	0.33743	0.0765349	0	0.37213	0	0.0334072	0	0	0	0

## Sheet: (F)Cervix-WES-Mult.
Malignancy	Assay	Approach	Samples	SBS1_exp	SBS2_exp	SBS3_exp	SBS5_exp	SBS6_exp	SBS10_exp	SBS13_exp	SBS14_exp	SBS15_exp	SBS18_exp	SBS20_exp	SBS21_exp	SBS26_exp
Cervical	WES	Multivariate	TCGA-2W-A8YY-01	0	0	0	0	0.420012	0.154051	0	0.222735	0.0910532	0	0	0.112148	0
Cervical	WES	Multivariate	TCGA-4J-AA1J-01	0.0992662	0.425735	0	0.145924	0	0	0.323577	0	0	0.00549797	0	0	0
Cervical	WES	Multivariate	TCGA-BI-A0VR-01	0.179777	0.328863	0	0.204355	0	0	0.281987	0	0	0.00501794	0	0	0
Cervical	WES	Multivariate	TCGA-BI-A0VS-01	0.327252	0.289482	0.158564	0.048039	0	0	0.176663	0	0	0	0	0	0
Cervical	WES	Multivariate	TCGA-BI-A20A-01	0.290663	0.345171	0	0.223154	0	0	0.0312956	0	0	0.109717	0	0	0
Cervical	WES	Multivariate	TCGA-C5-A0TN-01	0.350698	0.0642551	0	0.284753	0	0	0.300293	0	0	0	0	0	0
Cervical	WES	Multivariate	TCGA-C5-A1BE-01	0.263967	0.282777	0.0216792	0.242863	0	0	0.188713	0	0	0	0	0	0
Cervical	WES	Multivariate	TCGA-C5-A1BF-01	0.236456	0.137454	0	0.0207764	0	0	0.598764	0	0	0.00654928	0	0	0
Cervical	WES	Multivariate	TCGA-C5-A1BI-01	0.0883657	0.629975	0.0389043	0	0	0	0.242755	0	0	0	0	0	0
Cervical	WES	Multivariate	TCGA-C5-A1BJ-01	0.16209	0.304517	0	0	0	0	0.533393	0	0	0	0	0	0
Cervical	WES	Multivariate	TCGA-C5-A1BK-01	0.138371	0.490488	0	0.0126531	0	0	0.313461	0	0	0.0450271	0	0	0
Cervical	WES	Multivariate	TCGA-C5-A1BL-01	0.099031	0.419484	0	0.117983	0	0	0.333891	0	0	0.0296107	0	0	0
Cervical	WES	Multivariate	TCGA-C5-A1BM-01	0.162791	0.383405	0.00472407	0	0	0	0.44908	0	0	0	0	0	0
Cervical	WES	Multivariate	TCGA-C5-A1BN-01	0.239458	0.0833918	0	0.307776	0	0	0.35645	0	0	0.0129245	0	0	0
Cervical	WES	Multivariate	TCGA-C5-A1M5-01	0.512603	0.245489	0	0.154502	0	0	0.0874058	0	0	0	0	0	0
Cervical	WES	Multivariate	TCGA-C5-A1M6-01	0.11865	0.392615	0.0351877	0.0421441	0	0	0.411403	0	0	0	0	0	0
Cervical	WES	Multivariate	TCGA-C5-A1M7-01	0.114767	0.387244	0	0.164203	0	0	0.298588	0	0	0.0351973	0	0	0
Cervical	WES	Multivariate	TCGA-C5-A1M8-01	0.39283	0.291548	0.167782	0	0	0	0.078287	0	0	0.0695531	0	0	0
Cervical	WES	Multivariate	TCGA-C5-A1M9-01	0.368995	0.322225	0.00551934	0.203247	0	0	0.100013	0	0	0	0	0	0
Cervical	WES	Multivariate	TCGA-C5-A1ME-01	0.389525	0.269733	0.14172	0.152229	0	0	0.046793	0	0	0	0	0	0
Cervical	WES	Multivariate	TCGA-C5-A1MF-01	0.220112	0.248669	0	0.233887	0	0	0.297332	0	0	0	0	0	0
Cervical	WES	Multivariate	TCGA-C5-A1MH-01	0.0578952	0.44782	0	0.059865	0	0	0.43442	0	0	0	0	0	0
Cervical	WES	Multivariate	TCGA-C5-A1MI-01	0.461627	0.283482	0.0318839	0.0172211	0	0	0.205786	0	0	0	0	0	0
Cervical	WES	Multivariate	TCGA-C5-A1MJ-01	0.261494	0.312542	0.228795	0.0705496	0	0	0.12662	0	0	0	0	0	0
Cervical	WES	Multivariate	TCGA-C5-A1MK-01	0.101278	0.535182	0	0	0	0	0.36354	0	0	0	0	0	0
Cervical	WES	Multivariate	TCGA-C5-A1ML-01	0.107216	0.341828	0	0.277212	0	0	0.238109	0	0	0.0356355	0	0	0
Cervical	WES	Multivariate	TCGA-C5-A1MN-01	0.225396	0.344577	0	0.132158	0	0	0.254571	0	0	0.0432982	0	0	0
Cervical	WES	Multivariate	TCGA-C5-A1MP-01	0.120209	0.440241	0.248007	0.0420553	0	0	0.149487	0	0	0	0	0	0
Cervical	WES	Multivariate	TCGA-C5-A1MQ-01	0.132237	0.27565	0.074514	0.364979	0	0	0.15262	0	0	0	0	0	0
Cervical	WES	Multivariate	TCGA-C5-A2LS-01	0.445219	0.413239	0.0150246	0	0	0	0.0100892	0	0	0.116428	0	0	0
Cervical	WES	Multivariate	TCGA-C5-A2LT-01	0.403966	0.12431	0.315392	0	0	0	0.0393211	0	0	0.117011	0	0	0
Cervical	WES	Multivariate	TCGA-C5-A2LV-01	0.367214	0.197929	0	0.12175	0	0	0.154246	0	0	0.158861	0	0	0
Cervical	WES	Multivariate	TCGA-C5-A2LX-01	0.167042	0.261125	0.182186	0.206931	0	0	0.182715	0	0	0	0	0	0
Cervical	WES	Multivariate	TCGA-C5-A2LY-01	0.248107	0.331065	0	0.134022	0	0	0.286807	0	0	0	0	0	0
Cervical	WES	Multivariate	TCGA-C5-A2M1-01	0.209561	0.279004	0.168869	0.201021	0	0	0.141544	0	0	0	0	0	0
Cervical	WES	Multivariate	TCGA-C5-A2M2-01	0.867683	0.0302301	0.0818812	0	0	0	0.0064441	0	0	0.0137616	0	0	0
Cervical	WES	Multivariate	TCGA-C5-A3HF-01	0.285431	0.339934	0	0.215999	0	0	0.158636	0	0	0	0	0	0
Cervical	WES	Multivariate	TCGA-C5-A7CG-01	0.756505	0.0414022	0	0.194371	0	0	0.00772167	0	0	0	0	0	0
Cervical	WES	Multivariate	TCGA-C5-A7CH-01	0.248501	0.224737	0.318024	0.136928	0	0	0.0718099	0	0	0	0	0	0
Cervical	WES	Multivariate	TCGA-C5-A7CJ-01	0.494773	0.392312	0.0946073	0	0	0	0	0	0	0.0183079	0	0	0
Cervical	WES	Multivariate	TCGA-C5-A7CK-01	0.298836	0.216498	0	0.249791	0	0	0.206315	0	0	0.0285602	0	0	0
Cervical	WES	Multivariate	TCGA-C5-A7CL-01	0.304411	0.235617	0	0.0722755	0	0	0.387696	0	0	0	0	0	0
Cervical	WES	Multivariate	TCGA-C5-A7CM-01	0.468975	0.0769532	0	0.178319	0	0	0.11365	0	0	0.162103	0	0	0
Cervical	WES	Multivariate	TCGA-C5-A7CO-01	0.369599	0.250495	0.0627862	0.192326	0	0	0.124794	0	0	0	0	0	0
Cervical	WES	Multivariate	TCGA-C5-A7UC-01	0.240437	0.264039	0.100973	0	0	0	0.371021	0	0	0.0235313	0	0	0
Cervical	WES	Multivariate	TCGA-C5-A7UE-01	0.374268	0.0985907	0.203197	0.235984	0	0	0.0879601	0	0	0	0	0	0
Cervical	WES	Multivariate	TCGA-C5-A7UH-01	0.0980945	0.613693	0	0.00900572	0	0	0.238564	0	0	0.0406435	0	0	0
Cervical	WES	Multivariate	TCGA-C5-A7UI-01	0.199757	0.318843	0	0.156965	0	0	0.305288	0	0	0.0191475	0	0	0
Cervical	WES	Multivariate	TCGA-C5-A7X3-01	0.135782	0.242168	0	0.374145	0	0	0.247905	0	0	0	0	0	0
Cervical	WES	Multivariate	TCGA-C5-A7X5-01	0.241275	0.5095	0	0.110462	0	0	0.127782	0	0	0.01098	0	0	0
Cervical	WES	Multivariate	TCGA-C5-A7X8-01	0.259123	0.303507	0	0.335634	0	0	0.082417	0	0	0.0193188	0	0	0
Cervical	WES	Multivariate	TCGA-C5-A7XC-01	0.0976531	0.353941	0	0.313766	0	0	0.228199	0	0	0.00644108	0	0	0
Cervical	WES	Multivariate	TCGA-C5-A8XH-01	0.0908871	0.249497	0.307086	0.0701647	0	0	0.282365	0	0	0	0	0	0
Cervical	WES	Multivariate	TCGA-C5-A8XI-01	0.633441	0.0502161	0.1764	0	0	0	0.104802	0	0	0.0351415	0	0	0
Cervical	WES	Multivariate	TCGA-C5-A8XJ-01	0.0448737	0.53869	0	0.118003	0	0	0.298432	0	0	0	0	0	0
Cervical	WES	Multivariate	TCGA-C5-A8XK-01	0.0367331	0.396532	0	0.150765	0	0	0.41597	0	0	0	0	0	0
Cervical	WES	Multivariate	TCGA-C5-A8YQ-01	0.137988	0.224181	0.0280786	0.28386	0	0	0.325893	0	0	0	0	0	0
Cervical	WES	Multivariate	TCGA-C5-A8YR-01	0.101086	0.360656	0	0.12194	0	0	0.416319	0	0	0	0	0	0
Cervical	WES	Multivariate	TCGA-C5-A8ZZ-01	0.384455	0.0415941	0	0.544966	0	0	0.0289846	0	0	0	0	0	0
Cervical	WES	Multivariate	TCGA-C5-A901-01	0.173747	0.477482	0.0527041	0.222709	0	0	0.0733583	0	0	0	0	0	0
Cervical	WES	Multivariate	TCGA-C5-A902-01	0.0417284	0.563285	0	0.079212	0	0	0.273107	0	0	0.0426674	0	0	0
Cervical	WES	Multivariate	TCGA-C5-A905-01	0.323948	0.343792	0.0658413	0	0	0	0.244783	0	0	0.0216354	0	0	0
Cervical	WES	Multivariate	TCGA-C5-A907-01	0.108524	0.410165	0.00851782	0.330409	0	0	0.142384	0	0	0	0	0	0
Cervical	WES	Multivariate	TCGA-DG-A2KH-01	0.367654	0.499765	0.0118361	0.0951088	0	0	0.0256366	0	0	0	0	0	0
Cervical	WES	Multivariate	TCGA-DG-A2KJ-01	0.295213	0.427388	0.180352	0	0	0	0.0970467	0	0	0	0	0	0
Cervical	WES	Multivariate	TCGA-DG-A2KK-01	0.107576	0.424165	0	0.0588785	0	0	0.40938	0	0	0	0	0	0
Cervical	WES	Multivariate	TCGA-DG-A2KL-01	0.267256	0.420127	0.0107025	0	0	0	0.301914	0	0	0	0	0	0
Cervical	WES	Multivariate	TCGA-DG-A2KM-01	0.118138	0.297112	0	0	0	0	0.58475	0	0	0	0	0	0
Cervical	WES	Multivariate	TCGA-DR-A0ZL-01	0.326662	0.0781461	0	0.305589	0	0	0.233636	0	0	0.0559665	0	0	0
Cervical	WES	Multivariate	TCGA-DR-A0ZM-01	0.0191938	0.411011	0	0	0	0	0.569795	0	0	0	0	0	0
Cervical	WES	Multivariate	TCGA-DS-A0VK-01	0.181911	0.547853	0.117676	0	0	0	0.15256	0	0	0	0	0	0
Cervical	WES	Multivariate	TCGA-DS-A0VL-01	0.250673	0.318226	0.051934	0	0	0	0.379167	0	0	0	0	0	0
Cervical	WES	Multivariate	TCGA-DS-A0VM-01	0.080993	0.573137	0.0129136	0	0	0	0.305196	0	0	0.0277602	0	0	0
Cervical	WES	Multivariate	TCGA-DS-A0VN-01	0.162625	0.449164	0.0870156	0.0839184	0	0	0.217277	0	0	0	0	0	0
Cervical	WES	Multivariate	TCGA-DS-A1OA-01	0.175621	0.253308	0	0.513405	0	0	0.0576654	0	0	0	0	0	0
Cervical	WES	Multivariate	TCGA-DS-A1OB-01	0.106046	0.570257	0	0.114515	0	0	0.209182	0	0	0	0	0	0
Cervical	WES	Multivariate	TCGA-DS-A1OC-01	0	0.169272	0.0525871	0.525472	0	0	0.252668	0	0	0	0	0	0
Cervical	WES	Multivariate	TCGA-DS-A1OD-01	0.134936	0.0414583	0	0.382798	0	0	0.0625966	0	0	0	0	0	0.378211
Cervical	WES	Multivariate	TCGA-DS-A3LQ-01	0.424497	0.0352805	0	0.498256	0	0	0.0419668	0	0	0	0	0	0
Cervical	WES	Multivariate	TCGA-DS-A5RQ-01	0.220829	0.546293	0	0.140246	0	0	0.0473239	0	0	0.0453086	0	0	0
Cervical	WES	Multivariate	TCGA-DS-A7WF-01	0.341519	0.158699	0	0.352854	0	0	0	0	0	0.146928	0	0	0
Cervical	WES	Multivariate	TCGA-DS-A7WH-01	0.290593	0.390116	0	0.133273	0	0	0.143149	0	0	0.04287	0	0	0
Cervical	WES	Multivariate	TCGA-DS-A7WI-01	0.508819	0	0.430756	0	0	0	0	0	0	0.0604242	0	0	0
Cervical	WES	Multivariate	TCGA-EA-A1QS-01	0.417729	0.319659	0.0438117	0	0	0	0.213703	0	0	0.00509829	0	0	0
Cervical	WES	Multivariate	TCGA-EA-A1QT-01	0.282263	0.129409	0.121439	0.420932	0	0	0.0459565	0	0	0	0	0	0
Cervical	WES	Multivariate	TCGA-EA-A3HQ-01	0.411144	0.2031	0	0.230408	0	0	0.0509834	0	0	0.104364	0	0	0
Cervical	WES	Multivariate	TCGA-EA-A3HR-01	0.248711	0.268466	0	0.235848	0	0	0.208516	0	0	0.0384595	0	0	0
Cervical	WES	Multivariate	TCGA-EA-A3HS-01	0.493853	0.0113206	0	0	0.344398	0	0.0136281	0.136801	0	0	0	0	0
Cervical	WES	Multivariate	TCGA-EA-A3HT-01	0.167658	0.541377	0	0.290965	0	0	0	0	0	0	0	0	0
Cervical	WES	Multivariate	TCGA-EA-A3HU-01	0.338783	0.183406	0	0.323695	0	0	0.154116	0	0	0	0	0	0
Cervical	WES	Multivariate	TCGA-EA-A3QD-01	0.206592	0.509278	0.0493564	0.105964	0	0	0.128809	0	0	0	0	0	0
Cervical	WES	Multivariate	TCGA-EA-A3QE-01	0.364801	0.288043	0	0.132235	0	0	0.133756	0	0	0.0811658	0	0	0
Cervical	WES	Multivariate	TCGA-EA-A3Y4-01	0.0544213	0.400591	0	0.167596	0	0	0.377392	0	0	0	0	0	0
Cervical	WES	Multivariate	TCGA-EA-A410-01	0.523081	0	0	0	0.15265	0	0	0.077329	0.182382	0	0	0	0.0645581
Cervical	WES	Multivariate	TCGA-EA-A411-01	0.347048	0.0719181	0.314411	0.156143	0	0	0.11048	0	0	0	0	0	0
Cervical	WES	Multivariate	TCGA-EA-A439-01	0.320145	0.318466	0	0.156764	0	0	0.204625	0	0	0	0	0	0
Cervical	WES	Multivariate	TCGA-EA-A43B-01	0.0939645	0.290016	0.0636639	0	0	0	0.552356	0	0	0	0	0	0
Cervical	WES	Multivariate	TCGA-EA-A5FO-01	0.552751	0.261345	0	0.144124	0	0	0	0	0	0.0417803	0	0	0
Cervical	WES	Multivariate	TCGA-EA-A5O9-01	0.790174	0.0752367	0.057216	0	0	0	0.00912648	0	0	0.068247	0	0	0
Cervical	WES	Multivariate	TCGA-EA-A5ZD-01	0.545025	0.194186	0	0.165961	0	0	0	0	0	0.0948288	0	0	0
Cervical	WES	Multivariate	TCGA-EA-A5ZE-01	0.26196	0.186143	0	0.486764	0	0	0.0651332	0	0	0	0	0	0
Cervical	WES	Multivariate	TCGA-EA-A5ZF-01	0.290321	0.261251	0	0.335174	0	0	0.0818942	0	0	0.0313597	0	0	0
Cervical	WES	Multivariate	TCGA-EA-A6QX-01	0.175816	0.518756	0	0.146531	0	0	0.158897	0	0	0	0	0	0
Cervical	WES	Multivariate	TCGA-EA-A78R-01	0.260948	0.352192	0.142634	0.071676	0	0	0.17255	0	0	0	0	0	0
Cervical	WES	Multivariate	TCGA-EA-A97N-01	0.290188	0.524794	0	0	0	0	0.185018	0	0	0	0	0	0
Cervical	WES	Multivariate	TCGA-EK-A2GZ-01	0.554103	0.285901	0.087861	0	0	0	0.0263993	0	0	0.0457353	0	0	0
Cervical	WES	Multivariate	TCGA-EK-A2H0-01	0.100185	0.366883	0	0.073768	0	0	0.459164	0	0	0	0	0	0
Cervical	WES	Multivariate	TCGA-EK-A2H1-01	0.161395	0.425776	0.0321601	0.11112	0	0	0.26955	0	0	0	0	0	0
Cervical	WES	Multivariate	TCGA-EK-A2IP-01	0.0492012	0.595812	0	0.0104916	0	0	0.342705	0	0	0.00179012	0	0	0
Cervical	WES	Multivariate	TCGA-EK-A2PG-01	0.0866213	0.487304	0	0.0661816	0	0	0.333107	0	0	0.0267854	0	0	0
Cervical	WES	Multivariate	TCGA-EK-A2PI-01	0.365527	0.229817	0	0.204394	0	0	0.200263	0	0	0	0	0	0
Cervical	WES	Multivariate	TCGA-EK-A2PK-01	0.492906	0	0	0.369832	0	0	0.137261	0	0	0	0	0	0
Cervical	WES	Multivariate	TCGA-EK-A2PL-01	0.0834662	0.360445	0	0	0	0	0.556089	0	0	0	0	0	0
Cervical	WES	Multivariate	TCGA-EK-A2PM-01	0.0634188	0.270419	0.316226	0.120103	0	0	0.229834	0	0	0	0	0	0
Cervical	WES	Multivariate	TCGA-EK-A2R7-01	0.14634	0.238337	0	0.160923	0	0	0.445428	0	0	0.00897259	0	0	0
Cervical	WES	Multivariate	TCGA-EK-A2R8-01	0.0421213	0.453049	0	0	0	0	0.50483	0	0	0	0	0	0
Cervical	WES	Multivariate	TCGA-EK-A2R9-01	0.553762	0.211683	0.234289	0	0	0	0.0002661	0	0	0	0	0	0
Cervical	WES	Multivariate	TCGA-EK-A2RA-01	0.181565	0.314223	0.0174994	0.191281	0	0	0.295433	0	0	0	0	0	0
Cervical	WES	Multivariate	TCGA-EK-A2RB-01	0.399675	0.30333	0.0844976	0	0	0	0.205099	0	0	0.00739875	0	0	0
Cervical	WES	Multivariate	TCGA-EK-A2RC-01	0.0892185	0.300078	0	0.0209911	0	0	0.589713	0	0	0	0	0	0
Cervical	WES	Multivariate	TCGA-EK-A2RD-01	0.0911211	0.666369	0	0	0	0	0.24251	0	0	0	0	0	0
Cervical	WES	Multivariate	TCGA-EK-A2RE-01	0.695261	0.079621	0	0.225118	0	0	0	0	0	0	0	0	0
Cervical	WES	Multivariate	TCGA-EK-A2RJ-01	0.0706683	0.424464	0.0261105	0.0482473	0	0	0.43051	0	0	0	0	0	0
Cervical	WES	Multivariate	TCGA-EK-A2RK-01	0.105996	0.499791	0.047813	0	0	0	0.3464	0	0	0	0	0	0
Cervical	WES	Multivariate	TCGA-EK-A2RL-01	0.710134	0.000845023	0.203034	0	0	0	0	0	0	0.0859874	0	0	0
Cervical	WES	Multivariate	TCGA-EK-A2RM-01	0.166237	0.308962	0.0287576	0.276844	0	0	0.219199	0	0	0	0	0	0
Cervical	WES	Multivariate	TCGA-EK-A2RN-01	0.21416	0.480345	0.00107601	0.101228	0	0	0.203191	0	0	0	0	0	0
Cervical	WES	Multivariate	TCGA-EK-A2RO-01	0.348649	0.281264	0	0.189505	0	0	0.162107	0	0	0.0184753	0	0	0
Cervical	WES	Multivariate	TCGA-EK-A3GJ-01	0.0817669	0.432142	0.0308187	0	0	0	0.455272	0	0	0	0	0	0
Cervical	WES	Multivariate	TCGA-EK-A3GK-01	0.0180824	0.464285	0	0	0	0	0.494137	0	0	0.0234955	0	0	0
Cervical	WES	Multivariate	TCGA-EK-A3GM-01	0.203092	0.467315	0.0703443	0.0660077	0	0	0.193241	0	0	0	0	0	0
Cervical	WES	Multivariate	TCGA-EK-A3GN-01	0.598347	0.294225	0	0.104778	0	0	0.00265041	0	0	0	0	0	0
Cervical	WES	Multivariate	TCGA-EX-A1H5-01	0.745894	0.191176	0	0.0629293	0	0	0	0	0	0	0	0	0
Cervical	WES	Multivariate	TCGA-EX-A1H6-01	0.209095	0.486629	0.0797121	0	0	0	0.205109	0	0	0.0194545	0	0	0
Cervical	WES	Multivariate	TCGA-EX-A3L1-01	0.307064	0.25966	0.316112	0	0	0	0.117164	0	0	0	0	0	0
Cervical	WES	Multivariate	TCGA-EX-A449-01	0.833411	0.0281661	0.00225522	0.0367805	0	0	0	0	0	0.0993869	0	0	0
Cervical	WES	Multivariate	TCGA-EX-A69L-01	0.203348	0.437868	0	0.0223989	0	0	0.31143	0	0	0.0249549	0	0	0
Cervical	WES	Multivariate	TCGA-EX-A69M-01	0.281451	0.150342	0	0.568207	0	0	0	0	0	0	0	0	0
Cervical	WES	Multivariate	TCGA-EX-A8YF-01	0.332921	0.503031	0.0597314	0.104317	0	0	0	0	0	0	0	0	0
Cervical	WES	Multivariate	TCGA-FU-A23K-01	0.115597	0.367536	0.166243	0.0622529	0	0	0.288371	0	0	0	0	0	0
Cervical	WES	Multivariate	TCGA-FU-A23L-01	0.0757889	0.243605	0.0447075	0.220983	0	0	0.414915	0	0	0	0	0	0
Cervical	WES	Multivariate	TCGA-FU-A2QG-01	0.14589	0.540891	0	0.0915242	0	0	0.209307	0	0	0.0123882	0	0	0
Cervical	WES	Multivariate	TCGA-FU-A3EO-01	0.42518	0.121631	0	0.423812	0	0	0.0293773	0	0	0	0	0	0
Cervical	WES	Multivariate	TCGA-FU-A3HY-01	0.124871	0.429324	0	0	0	0	0.390635	0	0	0.0551703	0	0	0
Cervical	WES	Multivariate	TCGA-FU-A3HZ-01	0	0	0.145281	0	0	0.560962	0	0.0463062	0	0.195197	0	0	0.0522546
Cervical	WES	Multivariate	TCGA-FU-A3NI-01	0.39377	0.344427	0.114692	0.0849762	0	0	0.0621345	0	0	0	0	0	0
Cervical	WES	Multivariate	TCGA-FU-A3TQ-01	0.60755	0.0531305	0.169795	0.0531966	0	0	0.116327	0	0	0	0	0	0
Cervical	WES	Multivariate	TCGA-FU-A3TX-01	0.30719	0.198928	0.173346	0.159172	0	0	0.161365	0	0	0	0	0	0
Cervical	WES	Multivariate	TCGA-FU-A3WB-01	0.427103	0.377829	0.018582	0	0	0	0.136015	0	0	0.0404709	0	0	0
Cervical	WES	Multivariate	TCGA-FU-A3YQ-01	0.196857	0.320426	0	0.0742469	0	0	0.381447	0	0	0.0270238	0	0	0
Cervical	WES	Multivariate	TCGA-FU-A40J-01	0.097887	0.323598	0.0638826	0.231438	0	0	0.283194	0	0	0	0	0	0
Cervical	WES	Multivariate	TCGA-FU-A5XV-01	0.233031	0.293776	0.0134267	0.0691666	0	0	0.3906	0	0	0	0	0	0
Cervical	WES	Multivariate	TCGA-FU-A770-01	0.131452	0.39361	0	0.382365	0	0	0.0717714	0	0	0.0208016	0	0	0
Cervical	WES	Multivariate	TCGA-GH-A9DA-01	0.0843778	0.284502	0	0.203654	0	0	0.420228	0	0	0.00723868	0	0	0
Cervical	WES	Multivariate	TCGA-HG-A2PA-01	0.151595	0.181933	0	0.609075	0	0	0.00140798	0	0	0.0559885	0	0	0
Cervical	WES	Multivariate	TCGA-HG-A9SC-01	0.375315	0.017689	0.209936	0.377942	0	0	0.0191179	0	0	0	0	0	0
Cervical	WES	Multivariate	TCGA-HM-A3JJ-01	0.340362	0.147019	0	0.339334	0	0	0.122945	0	0	0.0503401	0	0	0
Cervical	WES	Multivariate	TCGA-HM-A3JK-01	0.376718	0.320287	0.0509136	0.19632	0	0	0.0557618	0	0	0	0	0	0
Cervical	WES	Multivariate	TCGA-HM-A6W2-01	0.38066	0.0631142	0	0.552887	0	0	0	0	0	0.0033387	0	0	0
Cervical	WES	Multivariate	TCGA-IR-A3L7-01	0.296734	0.0932589	0	0.504496	0	0	0.105511	0	0	0	0	0	0
Cervical	WES	Multivariate	TCGA-IR-A3LA-01	0.0398782	0.41901	0.015029	0.0130529	0	0	0.51303	0	0	0	0	0	0
Cervical	WES	Multivariate	TCGA-IR-A3LB-01	0.381057	0.35572	0.0744859	0	0	0	0.128887	0	0	0.0598504	0	0	0
Cervical	WES	Multivariate	TCGA-IR-A3LC-01	0.261476	0.0823133	0	0.482121	0	0	0.17409	0	0	0	0	0	0
Cervical	WES	Multivariate	TCGA-IR-A3LF-01	0.195733	0.541687	0.0439902	0	0	0	0.21859	0	0	0	0	0	0
Cervical	WES	Multivariate	TCGA-IR-A3LH-01	0.00718126	0.453781	0	0.0525939	0	0	0.486444	0	0	0	0	0	0
Cervical	WES	Multivariate	TCGA-IR-A3LI-01	0.0494196	0.620248	0	0.0702371	0	0	0.229689	0	0	0.0304066	0	0	0
Cervical	WES	Multivariate	TCGA-IR-A3LK-01	0.0400425	0.422125	0	0	0	0	0.537833	0	0	0	0	0	0
Cervical	WES	Multivariate	TCGA-IR-A3LL-01	0.0700429	0.544445	0	0	0	0	0.385512	0	0	0	0	0	0
Cervical	WES	Multivariate	TCGA-JW-A5VG-01	0.564121	0.0222912	0.163364	0.250224	0	0	0	0	0	0	0	0	0
Cervical	WES	Multivariate	TCGA-JW-A5VH-01	0.504853	0	0	0.255158	0	0	0.00749876	0	0	0.232491	0	0	0
Cervical	WES	Multivariate	TCGA-JW-A5VI-01	0.467363	0.160401	0.0224085	0.116872	0	0	0.232955	0	0	0	0	0	0
Cervical	WES	Multivariate	TCGA-JW-A5VJ-01	0.0461909	0.582773	0	0.0901396	0	0	0.270696	0	0	0.0102002	0	0	0
Cervical	WES	Multivariate	TCGA-JW-A5VK-01	0.541478	0.152286	0	0.200101	0	0	0	0	0	0.106135	0	0	0
Cervical	WES	Multivariate	TCGA-JW-A5VL-01	0.0157624	0.392162	0	0	0	0	0.592075	0	0	0	0	0	0
Cervical	WES	Multivariate	TCGA-JW-A69B-01	0.613381	0.158616	0	0.147456	0	0	0.00853585	0	0	0.0720112	0	0	0
Cervical	WES	Multivariate	TCGA-JW-A852-01	0.40366	0.322486	0.102503	0	0	0	0.111537	0	0	0.059814	0	0	0
Cervical	WES	Multivariate	TCGA-JW-AAVH-01	0.399318	0.338773	0	0.107555	0	0	0.138465	0	0	0.0158895	0	0	0
Cervical	WES	Multivariate	TCGA-JX-A3PZ-01	0.322035	0.225354	0.107502	0	0	0	0.283462	0	0	0.0616477	0	0	0
Cervical	WES	Multivariate	TCGA-JX-A3Q0-01	0.0259238	0.659232	0	0.0875379	0	0	0.227306	0	0	0	0	0	0
Cervical	WES	Multivariate	TCGA-JX-A3Q8-01	0.148857	0.139913	0	0.638741	0	0	0.0724888	0	0	0	0	0	0
Cervical	WES	Multivariate	TCGA-JX-A5QV-01	0.68323	0.124035	0	0.154116	0	0	0.0386191	0	0	0	0	0	0
Cervical	WES	Multivariate	TCGA-LP-A4AU-01	0.329747	0.493948	0	0.126199	0	0	0.050106	0	0	0	0	0	0
Cervical	WES	Multivariate	TCGA-LP-A4AV-01	0.0933005	0.548804	0	0	0	0	0.337181	0	0	0.0207136	0	0	0
Cervical	WES	Multivariate	TCGA-LP-A4AW-01	0.240467	0.0614957	0.317796	0.238985	0	0	0.141257	0	0	0	0	0	0
Cervical	WES	Multivariate	TCGA-LP-A4AX-01	0.165288	0.326669	0	0.269518	0	0	0.193927	0	0	0.0445972	0	0	0
Cervical	WES	Multivariate	TCGA-LP-A5U2-01	0.046764	0.364507	0	0	0	0	0.588729	0	0	0	0	0	0
Cervical	WES	Multivariate	TCGA-LP-A5U3-01	0.333742	0.468198	0	0.129804	0	0	0.0682562	0	0	0	0	0	0
Cervical	WES	Multivariate	TCGA-LP-A7HU-01	0.234096	0.338996	0	0.23763	0	0	0.189277	0	0	0	0	0	0
Cervical	WES	Multivariate	TCGA-MA-AA3W-01	0.554722	0.158618	0.0868581	0.153154	0	0	0.0466477	0	0	0	0	0	0
Cervical	WES	Multivariate	TCGA-MA-AA3X-01	0.246401	0.328564	0.0352113	0.385878	0	0	0.00394616	0	0	0	0	0	0
Cervical	WES	Multivariate	TCGA-MA-AA3Y-01	0.134005	0.419466	0	0	0	0	0.446529	0	0	0	0	0	0
Cervical	WES	Multivariate	TCGA-MA-AA3Z-01	0.0821648	0.619832	0	0.0539263	0	0	0.244077	0	0	0	0	0	0
Cervical	WES	Multivariate	TCGA-MA-AA41-01	0.0639072	0.464307	0	0	0	0	0.467065	0	0	0.00472123	0	0	0
Cervical	WES	Multivariate	TCGA-MA-AA42-01	0.552069	0.0821138	0	0.277729	0	0	0.0880875	0	0	0	0	0	0
Cervical	WES	Multivariate	TCGA-MA-AA43-01	0.510717	0.254808	0	0.177654	0	0	0	0	0	0.0568206	0	0	0
Cervical	WES	Multivariate	TCGA-MU-A5YI-01	0.353146	0.266687	0	0.145175	0	0	0.206067	0	0	0.0289251	0	0	0
Cervical	WES	Multivariate	TCGA-MU-A8JM-01	0.139917	0.475386	0	0.223025	0	0	0.107726	0	0	0.0539451	0	0	0
Cervical	WES	Multivariate	TCGA-MY-A913-01	0.0886363	0.363935	0	0	0	0	0.498536	0	0	0.0488931	0	0	0
Cervical	WES	Multivariate	TCGA-PN-A8MA-01	0.361122	0.300465	0.122339	0	0	0	0.216073	0	0	0	0	0	0
Cervical	WES	Multivariate	TCGA-Q1-A5R1-01	0.337566	0.399866	0.0737609	0.0981438	0	0	0.0906631	0	0	0	0	0	0
Cervical	WES	Multivariate	TCGA-Q1-A5R2-01	0.174096	0.428062	0	0.0343104	0	0	0.363532	0	0	0	0	0	0
Cervical	WES	Multivariate	TCGA-Q1-A5R3-01	0.327955	0.231101	0	0.211139	0	0	0.170716	0	0	0.0590884	0	0	0
Cervical	WES	Multivariate	TCGA-Q1-A6DT-01	0.20831	0.225505	0	0.26127	0	0	0.304915	0	0	0	0	0	0
Cervical	WES	Multivariate	TCGA-Q1-A6DV-01	0.684923	0.100733	0	0.20775	0	0	0.00659432	0	0	0	0	0	0
Cervical	WES	Multivariate	TCGA-Q1-A6DW-01	0.362641	0.350126	0.115304	0	0	0	0.171929	0	0	0	0	0	0
Cervical	WES	Multivariate	TCGA-Q1-A73O-01	0	0.490695	0	0	0	0	0.509305	0	0	0	0	0	0
Cervical	WES	Multivariate	TCGA-Q1-A73P-01	0.130186	0.430251	0.0538683	0	0	0	0.328748	0	0	0.0569459	0	0	0
Cervical	WES	Multivariate	TCGA-Q1-A73Q-01	0.167929	0.356576	0	0.251397	0	0	0.160173	0	0	0.0639254	0	0	0
Cervical	WES	Multivariate	TCGA-Q1-A73R-01	0.539524	0.145081	0.0962024	0.219192	0	0	0	0	0	0	0	0	0
Cervical	WES	Multivariate	TCGA-Q1-A73S-01	0.459396	0.133458	0.238107	0	0	0	0.055241	0	0	0.113798	0	0	0
Cervical	WES	Multivariate	TCGA-R2-A69V-01	0.0840052	0.0784908	0.102124	0.279831	0	0	0.455549	0	0	0	0	0	0
Cervical	WES	Multivariate	TCGA-RA-A741-01	0.126425	0.43219	0.108269	0.196052	0	0	0.137065	0	0	0	0	0	0
Cervical	WES	Multivariate	TCGA-UC-A7PD-01	0.24586	0.247059	0	0.101919	0	0	0.405162	0	0	0	0	0	0
Cervical	WES	Multivariate	TCGA-UC-A7PF-01	0.0448594	0.599272	0.00524858	0.0563493	0	0	0.294271	0	0	0	0	0	0
Cervical	WES	Multivariate	TCGA-UC-A7PG-01	0.159369	0.416538	0	0	0	0	0.386984	0	0	0.0371088	0	0	0
Cervical	WES	Multivariate	TCGA-UC-A7PI-01	0.536523	0.123201	0.0499212	0.197244	0	0	0.0931118	0	0	0	0	0	0
Cervical	WES	Multivariate	TCGA-VS-A8EB-01	0.263688	0.293028	0	0.290353	0	0	0.135944	0	0	0.0169867	0	0	0
Cervical	WES	Multivariate	TCGA-VS-A8EC-01	0.361623	0.199141	0	0.369013	0	0	0.0452894	0	0	0.0249337	0	0	0
Cervical	WES	Multivariate	TCGA-VS-A8EG-01	0.819362	0.100316	0.0624134	0	0	0	0.0179082	0	0	0	0	0	0
Cervical	WES	Multivariate	TCGA-VS-A8EH-01	0.455251	0.244335	0.258536	0	0	0	0.0301777	0	0	0.0117005	0	0	0
Cervical	WES	Multivariate	TCGA-VS-A8EI-01	0.114754	0.187998	0	0.306798	0	0	0.39045	0	0	0	0	0	0
Cervical	WES	Multivariate	TCGA-VS-A8EJ-01	0.108485	0.129008	0.486521	0.19776	0	0	0.0782273	0	0	0	0	0	0
Cervical	WES	Multivariate	TCGA-VS-A8EK-01	0.0973954	0.384827	0.29043	0	0	0	0.142375	0	0	0.0849731	0	0	0
Cervical	WES	Multivariate	TCGA-VS-A8EL-01	0.0674997	0.583969	0	0.0568289	0	0	0.27722	0	0	0.0144824	0	0	0
Cervical	WES	Multivariate	TCGA-VS-A8Q8-01	0.0986048	0.403186	0	0.153433	0	0	0.3232	0	0	0.0215762	0	0	0
Cervical	WES	Multivariate	TCGA-VS-A8Q9-01	0.444183	0.259565	0	0.274824	0	0	0.0214272	0	0	0	0	0	0
Cervical	WES	Multivariate	TCGA-VS-A8QA-01	0.215873	0.502436	0.0672574	0.0700151	0	0	0.144418	0	0	0	0	0	0
Cervical	WES	Multivariate	TCGA-VS-A8QC-01	0.0951733	0.227812	0	0.231375	0	0	0.398809	0	0	0.0468312	0	0	0
Cervical	WES	Multivariate	TCGA-VS-A8QF-01	0.278344	0.156194	0	0.300461	0	0	0.265001	0	0	0	0	0	0
Cervical	WES	Multivariate	TCGA-VS-A8QH-01	0.353929	0	0.335441	0.189331	0	0	0.0362781	0	0	0.0850206	0	0	0
Cervical	WES	Multivariate	TCGA-VS-A8QM-01	0.161799	0.441437	0.0168203	0.14579	0	0	0.234153	0	0	0	0	0	0
Cervical	WES	Multivariate	TCGA-VS-A94W-01	0.415903	0.256689	0.0751713	0.128071	0	0	0.124166	0	0	0	0	0	0
Cervical	WES	Multivariate	TCGA-VS-A94X-01	0.0512463	0.370185	0	0.104758	0	0	0.442724	0	0	0.0310859	0	0	0
Cervical	WES	Multivariate	TCGA-VS-A94Y-01	0.399642	0.126317	0.120007	0.284488	0	0	0	0	0	0.0695463	0	0	0
Cervical	WES	Multivariate	TCGA-VS-A94Z-01	0.353175	0.0557445	0	0.439491	0	0	0.151589	0	0	0	0	0	0
Cervical	WES	Multivariate	TCGA-VS-A950-01	0.240274	0.338474	0.105669	0.145675	0	0	0.169908	0	0	0	0	0	0
Cervical	WES	Multivariate	TCGA-VS-A952-01	0.356305	0.474259	0.00705769	0	0	0	0.0975941	0	0	0.0647834	0	0	0
Cervical	WES	Multivariate	TCGA-VS-A953-01	0.0574852	0.447062	0.111917	0.0263644	0	0	0.357171	0	0	0	0	0	0
Cervical	WES	Multivariate	TCGA-VS-A954-01	0.330438	0.399946	0	0.162787	0	0	0.0969413	0	0	0.0098878	0	0	0
Cervical	WES	Multivariate	TCGA-VS-A957-01	0.390817	0.151623	0.0779262	0.356321	0	0	0	0	0	0.023313	0	0	0
Cervical	WES	Multivariate	TCGA-VS-A958-01	0.0121185	0.533577	0.0309275	0.00219104	0	0	0.421186	0	0	0	0	0	0
Cervical	WES	Multivariate	TCGA-VS-A959-01	0.168709	0.729332	0.0156242	0.0507375	0	0	0.0355975	0	0	0	0	0	0
Cervical	WES	Multivariate	TCGA-VS-A9U5-01	0.482436	0.113439	0	0.238858	0	0	0.0983835	0	0	0.0668834	0	0	0
Cervical	WES	Multivariate	TCGA-VS-A9U6-01	0.318857	0.127497	0	0.468894	0	0	0.077715	0	0	0.00703678	0	0	0
Cervical	WES	Multivariate	TCGA-VS-A9U7-01	0.0722785	0.45366	0	0.0660148	0	0	0.402435	0	0	0.00561182	0	0	0
Cervical	WES	Multivariate	TCGA-VS-A9UA-01	0.0969177	0.431878	0	0.136492	0	0	0.334713	0	0	0	0	0	0
Cervical	WES	Multivariate	TCGA-VS-A9UB-01	0.309478	0.108339	0.207194	0.316799	0	0	0.0581898	0	0	0	0	0	0
Cervical	WES	Multivariate	TCGA-VS-A9UC-01	0.0367295	0.425769	0.0162142	0.157064	0	0	0.364223	0	0	0	0	0	0
Cervical	WES	Multivariate	TCGA-VS-A9UD-01	0.594248	0.254447	0	0	0	0	0.151304	0	0	0	0	0	0
Cervical	WES	Multivariate	TCGA-VS-A9UH-01	0.0451048	0.324972	0	0.0635297	0	0	0.566394	0	0	0	0	0	0
Cervical	WES	Multivariate	TCGA-VS-A9UI-01	0.306961	0.432217	0	0.15387	0	0	0.106953	0	0	0	0	0	0
Cervical	WES	Multivariate	TCGA-VS-A9UJ-01	0.122626	0	0	0.224313	0	0	0	0.0662242	0.153624	0	0.433213	0	0
Cervical	WES	Multivariate	TCGA-VS-A9UL-01	0.311814	0.372054	0.0708037	0.198127	0	0	0.0472012	0	0	0	0	0	0
Cervical	WES	Multivariate	TCGA-VS-A9UM-01	0.193925	0.261479	0	0.324809	0	0	0.147132	0	0	0.0726551	0	0	0
Cervical	WES	Multivariate	TCGA-VS-A9UO-01	0.272302	0.0802371	0.576141	0	0	0	0.000741075	0	0	0.0705787	0	0	0
Cervical	WES	Multivariate	TCGA-VS-A9UP-01	0.0957153	0.368468	0	0.180986	0	0	0.291963	0	0	0.0628673	0	0	0
Cervical	WES	Multivariate	TCGA-VS-A9UQ-01	0.382312	0.163163	0.139292	0.315233	0	0	0	0	0	0	0	0	0
Cervical	WES	Multivariate	TCGA-VS-A9UR-01	0.169568	0.373939	0	0.199704	0	0	0.185752	0	0	0.0710367	0	0	0
Cervical	WES	Multivariate	TCGA-VS-A9UT-01	0.62474	0.0749322	0.0138659	0.286462	0	0	0	0	0	0	0	0	0
Cervical	WES	Multivariate	TCGA-VS-A9UU-01	0.581761	0.106452	0	0.265281	0	0	0.0465066	0	0	0	0	0	0
Cervical	WES	Multivariate	TCGA-VS-A9UV-01	0.494447	0.123767	0	0.320783	0	0	0.0610029	0	0	0	0	0	0
Cervical	WES	Multivariate	TCGA-VS-A9UY-01	0.146619	0.359031	0.116638	0.0828349	0	0	0.294878	0	0	0	0	0	0
Cervical	WES	Multivariate	TCGA-VS-A9UZ-01	0.205034	0.555496	0.111233	0	0	0	0.128237	0	0	0	0	0	0
Cervical	WES	Multivariate	TCGA-VS-A9V0-01	0.214671	0.0728456	0	0.557808	0	0	0.108541	0	0	0.0461347	0	0	0
Cervical	WES	Multivariate	TCGA-VS-A9V1-01	0.0505992	0.185311	0.237583	0.214533	0	0	0.311975	0	0	0	0	0	0
Cervical	WES	Multivariate	TCGA-VS-A9V2-01	0.486572	0.041481	0	0.225739	0	0	0.170563	0	0	0.0756451	0	0	0
Cervical	WES	Multivariate	TCGA-VS-A9V3-01	0.197957	0.528083	0.00713799	0	0	0	0.193952	0	0	0.0728707	0	0	0
Cervical	WES	Multivariate	TCGA-VS-A9V4-01	0.552525	0.0829639	0.117965	0.209952	0	0	0.0365951	0	0	0	0	0	0
Cervical	WES	Multivariate	TCGA-VS-A9V5-01	0.137623	0.442978	0	0.344333	0	0	0.0602145	0	0	0.0148506	0	0	0
Cervical	WES	Multivariate	TCGA-VS-AA62-01	0.0710752	0.291695	0	0.0689627	0	0	0.568267	0	0	0	0	0	0
Cervical	WES	Multivariate	TCGA-WL-A834-01	0.330687	0.155149	0	0.233638	0	0	0.192191	0	0	0.0883355	0	0	0
Cervical	WES	Multivariate	TCGA-XS-A8TJ-01	0.422121	0.450047	0	0.125302	0	0	0.00252993	0	0	0	0	0	0
Cervical	WES	Multivariate	TCGA-ZJ-A8QO-01	0.460515	0.20028	0.132591	0.191922	0	0	0.0146926	0	0	0	0	0	0
Cervical	WES	Multivariate	TCGA-ZJ-A8QR-01	0.0978805	0.418897	0	0.171139	0	0	0.312084	0	0	0	0	0	0
Cervical	WES	Multivariate	TCGA-ZJ-AAX4-01	0.378626	0.213957	0	0.324743	0	0	0	0	0	0.0826737	0	0	0
Cervical	WES	Multivariate	TCGA-ZJ-AAX8-01	0.0384818	0.566126	0	0.254071	0	0	0.12897	0	0	0.0123518	0	0	0
Cervical	WES	Multivariate	TCGA-ZJ-AAXA-01	0.124709	0.401246	0	0.325868	0	0	0.148177	0	0	0	0	0	0
Cervical	WES	Multivariate	TCGA-ZJ-AAXB-01	0.175629	0.260459	0.337841	0.0880504	0	0	0.13802	0	0	0	0	0	0
Cervical	WES	Multivariate	TCGA-ZJ-AAXD-01	0.172645	0.33596	0.182782	0	0	0	0.242366	0	0	0.0662472	0	0	0
Cervical	WES	Multivariate	TCGA-ZJ-AAXF-01	0.579841	0.216477	0.0224636	0.095429	0	0	0	0	0	0.08579	0	0	0
Cervical	WES	Multivariate	TCGA-ZJ-AAXI-01	0.283523	0.232684	0	0.31999	0	0	0.163803	0	0	0	0	0	0
Cervical	WES	Multivariate	TCGA-ZJ-AAXJ-01	0.258601	0.40357	0	0.145202	0	0	0.133383	0	0	0.059244	0	0	0
Cervical	WES	Multivariate	TCGA-ZJ-AAXN-01	0.292918	0.426199	0.204555	0.0123989	0	0	0.0639284	0	0	0	0	0	0
Cervical	WES	Multivariate	TCGA-ZJ-AAXT-01	0.124857	0.416093	0	0.0477978	0	0	0.39646	0	0	0.0147931	0	0	0
Cervical	WES	Multivariate	TCGA-ZJ-AAXU-01	0.0210196	0.607662	0.0270693	0	0	0	0.344249	0	0	0	0	0	0
Cervical	WES	Multivariate	TCGA-ZJ-AB0H-01	0.279281	0.248644	0.0556782	0.159244	0	0	0.257153	0	0	0	0	0	0
Cervical	WES	Multivariate	TCGA-ZJ-AB0I-01	0.154889	0.0509202	0.49469	0.162012	0	0	0.137489	0	0	0	0	0	0
Cervical	WES	Multivariate	TCGA-ZX-AA5X-01	0.576862	0.153089	0	0.263214	0	0	0.00683572	0	0	0	0	0	0

## Sheet: (G)UCEC-WGS-NMF-SBS
Malignancy	Assay	Approach	Samples	SBS1_exp	SBS2_exp	SBS3_exp	SBS5_exp	SBS8_exp	SBS10a_exp	SBS10b_exp	SBS13_exp	SBS14_exp	SBS15_exp	SBS44_exp
UCEC	WGS	NMF	SA459265	0.301546	0	0	0.32732	0	0	0	0	0	0.201031	0.170103
UCEC	WGS	NMF	SA459470	0.123077	0.123077	0	0.415385	0	0	0.123077	0	0	0.215385	0
UCEC	WGS	NMF	SA460515	0.115578	0	0	0	0	0.436558	0.447864	0	0	0	0
UCEC	WGS	NMF	SA460564	0.308642	0.197531	0	0.37037	0	0	0	0.123457	0	0	0
UCEC	WGS	NMF	SA460859	0.410256	0	0	0.282051	0	0	0.307692	0	0	0	0
UCEC	WGS	NMF	SA461016	0.372093	0	0	0.465116	0	0	0.162791	0	0	0	0
UCEC	WGS	NMF	SA461590	0.448276	0	0	0.206897	0	0	0.344828	0	0	0	0
UCEC	WGS	NMF	SA462324	0.208955	0	0	0.447761	0	0	0	0	0	0.343284	0
UCEC	WGS	NMF	SA462416	0.369565	0	0	0.434783	0	0	0.195652	0	0	0	0
UCEC	WGS	NMF	SA463369	0.174419	0.116279	0.5	0.0581395	0	0	0	0.151163	0	0	0
UCEC	WGS	NMF	SA464675	0.135199	0	0	0.0625148	0	0	0	0	0.313993	0.488293	0
UCEC	WGS	NMF	SA465631	0.284173	0	0	0.158273	0	0	0	0	0	0.26259	0.294964
UCEC	WGS	NMF	SA466124	0.392857	0	0	0.607143	0	0	0	0	0	0	0
UCEC	WGS	NMF	SA467449	0.379747	0	0	0.161392	0	0	0	0	0	0	0.458861
UCEC	WGS	NMF	SA468236	0.371429	0	0	0.628571	0	0	0	0	0	0	0
UCEC	WGS	NMF	SA468892	0.189615	0	0	0	0	0	0	0	0	0.810385	0
UCEC	WGS	NMF	SA469543	0.152542	0	0	0.610169	0	0	0	0	0	0.237288	0
UCEC	WGS	NMF	SA471720	0.270833	0.145833	0	0.583333	0	0	0	0	0	0	0
UCEC	WGS	NMF	SA471917	0.253165	0.151899	0	0.303797	0	0	0.177215	0.113924	0	0	0
UCEC	WGS	NMF	SA473026	0.0732759	0.306034	0	0.109914	0	0	0	0.510776	0	0	0
UCEC	WGS	NMF	SA473193	0.0801187	0.178042	0	0.25816	0	0	0	0.48368	0	0	0
UCEC	WGS	NMF	SA473856	0.363901	0	0	0.16885	0	0	0	0	0	0.262009	0.20524
UCEC	WGS	NMF	SA474315	0.415094	0	0	0.584906	0	0	0	0	0	0	0
UCEC	WGS	NMF	SA475881	0.182796	0	0	0.817204	0	0	0	0	0	0	0
UCEC	WGS	NMF	SA476204	0.27907	0.0697674	0	0.511628	0	0	0	0.139535	0	0	0
UCEC	WGS	NMF	SA476431	0.351852	0	0	0.407407	0	0	0	0	0	0	0.240741
UCEC	WGS	NMF	SA477133	0.259434	0	0	0.180818	0	0	0	0	0	0.193396	0.366352
UCEC	WGS	NMF	SA477288	0.414414	0	0	0.259459	0	0	0	0	0	0	0.326126
UCEC	WGS	NMF	SA478344	0.108401	0.0596206	0	0.300813	0	0	0	0	0	0.243902	0.287263
UCEC	WGS	NMF	SA478484	0.100365	0	0	0.69708	0	0	0	0	0	0.202555	0
UCEC	WGS	NMF	SA480023	0.20598	0.189369	0	0.255814	0	0	0	0.348837	0	0	0
UCEC	WGS	NMF	SA480113	0.214765	0	0	0.671141	0	0	0.114094	0	0	0	0
UCEC	WGS	NMF	SA480851	0.0720721	0.225225	0.513514	0	0	0	0	0.189189	0	0	0
UCEC	WGS	NMF	SA482408	0.435897	0	0	0.564103	0	0	0	0	0	0	0
UCEC	WGS	NMF	SA482767	0.280702	0	0	0.107769	0	0	0	0	0	0.243108	0.368421
UCEC	WGS	NMF	SA484286	0.25	0.0555556	0	0.569444	0	0	0	0.125	0	0	0
UCEC	WGS	NMF	SA484672	0.102273	0.0909091	0.448864	0.3125	0	0	0	0.0454545	0	0	0
UCEC	WGS	NMF	SA484822	0.425	0	0	0.575	0	0	0	0	0	0	0
UCEC	WGS	NMF	SA488516	0.3125	0	0	0.6875	0	0	0	0	0	0	0
UCEC	WGS	NMF	SA489209	0.618182	0	0	0.381818	0	0	0	0	0	0	0
UCEC	WGS	NMF	SA489774	0.0933333	0	0	0.56	0	0	0	0.12	0	0.226667	0
UCEC	WGS	NMF	SA490033	0.147563	0	0	0.852437	0	0	0	0	0	0	0
UCEC	WGS	NMF	SA514228	0.474576	0	0	0.525424	0	0	0	0	0	0	0
UCEC	WGS	NMF	SA514242	0.263158	0	0	0.0701754	0	0	0.210526	0	0	0.45614	0
UCEC	WGS	NMF	SA514298	0.160714	0.142857	0	0.267857	0	0	0	0.0892857	0	0.339286	0
UCEC	WGS	NMF	SA514311	0.128205	0	0	0.871795	0	0	0	0	0	0	0
UCEC	WGS	NMF	SA514319	0.108108	0.118919	0.578378	0	0	0	0	0.194595	0	0	0
UCEC	WGS	NMF	SA514358	0.142857	0	0.731092	0.12605	0	0	0	0	0	0	0
UCEC	WGS	NMF	SA514362	0.328571	0	0	0.671429	0	0	0	0	0	0	0
UCEC	WGS	NMF	SA514437	0.208696	0	0.365217	0.313043	0	0	0	0.113043	0	0	0
UCEC	WGS	NMF	SA514439	0.357143	0.0857143	0	0.557143	0	0	0	0	0	0	0
UCEC	WGS	NMF	SA598001	0.0969129	0.0296991	0	0.484955	0.320959	0	0	0.0674743	0	0	0
UCEC	WGS	NMF	SA598002	0.0806103	0.166987	0	0.443176	0	0	0	0.309226	0	0	0
UCEC	WGS	NMF	SA598003	0.0783711	0.161909	0	0.457185	0	0	0	0.302534	0	0	0
UCEC	WGS	NMF	SA598012	0.0335952	0	0.420343	0.264555	0.281507	0	0	0	0	0	0
UCEC	WGS	NMF	SA598013	0.0986941	0.0273732	0	0.50992	0.300226	0	0	0.063787	0	0	0
UCEC	WGS	NMF	SA598014	0.0362402	0	0.423142	0.245199	0.295419	0	0	0	0	0	0
UCEC	WGS	NMF	SA598017	0.145258	0	0	0.655043	0.199699	0	0	0	0	0	0
UCEC	WGS	NMF	SA598018	0.15057	0	0	0.662952	0.186478	0	0	0	0	0	0
UCEC	WGS	NMF	SA598025	0.186996	0	0	0.813004	0	0	0	0	0	0	0
UCEC	WGS	NMF	SA598026	0.0642363	0	0.358926	0.392099	0.184738	0	0	0	0	0	0
UCEC	WGS	NMF	SA598027	0.186638	0	0	0.813362	0	0	0	0	0	0	0
UCEC	WGS	NMF	SA598029	0.0666557	0	0	0.640653	0.292691	0	0	0	0	0	0
UCEC	WGS	NMF	SA598040	0.0672005	0	0	0.637118	0.295682	0	0	0	0	0	0
UCEC	WGS	NMF	SA598046	0.0648099	0	0	0.677022	0.258168	0	0	0	0	0	0
UCEC	WGS	NMF	SA598062	0.08	0.0224047	0	0.542991	0.308739	0	0	0.0458651	0	0	0
UCEC	WGS	NMF	SA598067	0.0791122	0.0201763	0	0.543167	0.31029	0	0	0.047255	0	0	0
UCEC	WGS	NMF	SA599088	0.0537058	0.0787493	0	0.458309	0.29531	0	0	0.113926	0	0	0
UCEC	WGS	NMF	SA599092	0.0527769	0.0828475	0	0.451212	0.29595	0	0	0.117214	0	0	0
UCEC	WGS	NMF	SA599098	0.0544594	0	0.690946	0.254595	0	0	0	0	0	0	0
UCEC	WGS	NMF	SA599102	0.0387704	0	0	0.563279	0.323698	0	0	0.0742525	0	0	0
UCEC	WGS	NMF	SA599107	0.160145	0.0684783	0	0.535326	0.190036	0	0	0.0460145	0	0	0
UCEC	WGS	NMF	SA599112	0.160404	0.0713332	0	0.528514	0.18787	0	0	0.0518787	0	0	0
UCEC	WGS	NMF	SA599118	0.194649	0	0	0.362764	0	0	0	0	0	0	0.442588
UCEC	WGS	NMF	SA599123	0.220562	0	0	0.369189	0	0	0	0	0	0	0.410249
UCEC	WGS	NMF	SA599132	0.134534	0.12936	0	0.443082	0.151591	0	0	0.141433	0	0	0
UCEC	WGS	NMF	SA599136	0.133189	0.126131	0	0.442273	0.163228	0	0	0.135179	0	0	0
UCEC	WGS	NMF	SA599143	0.0781711	0	0.578404	0.343425	0	0	0	0	0	0	0
UCEC	WGS	NMF	SA599146	0.0316993	0	0	0.968301	0	0	0	0	0	0	0
UCEC	WGS	NMF	SA599154	0.170507	0	0	0.607038	0.222455	0	0	0	0	0	0
UCEC	WGS	NMF	SA599157	0.170548	0	0	0.613384	0.216069	0	0	0	0	0	0
UCEC	WGS	NMF	SA599166	0.0532892	0	0	0.620202	0.326509	0	0	0	0	0	0
UCEC	WGS	NMF	SA599169	0.0468883	0	0	0.601307	0.351804	0	0	0	0	0	0
UCEC	WGS	NMF	SA599175	0.149661	0.0656341	0.381994	0.32333	0	0	0	0.0793804	0	0	0
UCEC	WGS	NMF	SA599177	0.151201	0.0685879	0.390394	0.309702	0	0	0	0.0801153	0	0	0
UCEC	WGS	NMF	SA601527	0.263171	0	0	0.736829	0	0	0	0	0	0	0
UCEC	WGS	NMF	SA601538	0.270181	0	0	0.729819	0	0	0	0	0	0	0
UCEC	WGS	NMF	SA601545	0.149909	0	0	0.321138	0	0	0	0	0	0	0.528952
UCEC	WGS	NMF	SA601548	0.153359	0	0	0.317018	0	0	0	0	0	0	0.529623
UCEC	WGS	NMF	SA601559	0.0953422	0	0	0.629149	0.232345	0	0	0.0431635	0	0	0
UCEC	WGS	NMF	SA601569	0.116302	0.0312735	0	0.559407	0.239513	0	0	0.0535041	0	0	0

## Sheet: (H)UCEC-WGS-NMF-ID
Malignancy	Assay	Approach	Samples	ID1_exp	ID2_exp	ID3_exp	ID7_exp	ID8_exp
UCEC	WGS	NMF	SA459265	0	0.253165	0	0.746835	0
UCEC	WGS	NMF	SA459470	0	0	0	0	1
UCEC	WGS	NMF	SA460515	1	0	0	0	0
UCEC	WGS	NMF	SA460564	0	0	1	0	0
UCEC	WGS	NMF	SA460859	0	0	1	0	0
UCEC	WGS	NMF	SA461016	0	1	0	0	0
UCEC	WGS	NMF	SA461590	0.333333	0	0	0	0.666667
UCEC	WGS	NMF	SA462324	0	0	0	0	1
UCEC	WGS	NMF	SA462416	0.333333	0	0	0	0.666667
UCEC	WGS	NMF	SA463369	0	0	0.5	0	0.5
UCEC	WGS	NMF	SA464675	0.149573	0.433761	0	0.416667	0
UCEC	WGS	NMF	SA465631	0.118421	0.25	0	0.631579	0
UCEC	WGS	NMF	SA466124	0	0	1	0	0
UCEC	WGS	NMF	SA467449	0	0.46134	0	0.53866	0
UCEC	WGS	NMF	SA468236	0	0	0.5	0	0.5
UCEC	WGS	NMF	SA468892	0.231144	0.323601	0	0.445255	0
UCEC	WGS	NMF	SA469543	1	0	0	0	0
UCEC	WGS	NMF	SA471720	0	0	1	0	0
UCEC	WGS	NMF	SA471917	0	0	0	0	1
UCEC	WGS	NMF	SA473026	0	0	0	0	1
UCEC	WGS	NMF	SA473193	0	0.125	0	0	0.875
UCEC	WGS	NMF	SA473856	0	0.411765	0	0.588235	0
UCEC	WGS	NMF	SA474315	0	0	0.5	0	0.5
UCEC	WGS	NMF	SA475881	0	0	0	0	1
UCEC	WGS	NMF	SA476204	0	0	0	0	1
UCEC	WGS	NMF	SA476431	0	0	0	0	1
UCEC	WGS	NMF	SA477133	0	0.358268	0	0.641732	0
UCEC	WGS	NMF	SA477288	0.0915033	0.496732	0	0.411765	0
UCEC	WGS	NMF	SA478344	0.131148	0.393443	0	0.47541	0
UCEC	WGS	NMF	SA478484	0.690722	0.309278	0	0	0
UCEC	WGS	NMF	SA480023	0.142857	0	0	0	0.857143
UCEC	WGS	NMF	SA480113	0	0	0	0	1
UCEC	WGS	NMF	SA480851	0	0.25	0	0	0.75
UCEC	WGS	NMF	SA482408	0	0	0	0	1
UCEC	WGS	NMF	SA482767	0.110294	0.294118	0	0.595588	0
UCEC	WGS	NMF	SA484286	0	0	0	0.25	0.75
UCEC	WGS	NMF	SA484672	0	0	0	0	1
UCEC	WGS	NMF	SA484822	0	0	0	0	1
UCEC	WGS	NMF	SA488516	0	0	0	0	1
UCEC	WGS	NMF	SA489209	0	0	0	0	1
UCEC	WGS	NMF	SA489774	0	0.333333	0	0	0.666667
UCEC	WGS	NMF	SA490033	0.129371	0.342657	0	0.527972	0
UCEC	WGS	NMF	SA514228	0.4	0	0	0	0.6
UCEC	WGS	NMF	SA514242	0	0	1	0	0
UCEC	WGS	NMF	SA514298	0	0	1	0	0
UCEC	WGS	NMF	SA514311	0	0	1	0	0
UCEC	WGS	NMF	SA514319	0	0	1	0	0
UCEC	WGS	NMF	SA514358	0	0	0	0	1
UCEC	WGS	NMF	SA514362	0	0	1	0	0
UCEC	WGS	NMF	SA514437	0	0	0	0	1
UCEC	WGS	NMF	SA514439	0	0	0	0	1

## Sheet: (I)UCEC-WGS-NMF-DBS
Malignancy	Assay	Approach	Samples	DBS2_exp	DBS4_exp	DBS6_exp	DBS9_exp	DBS11_exp
UCEC	WGS	NMF	SA459265	0	0	0	0	1
UCEC	WGS	NMF	SA460515	0	0	0	1	0
UCEC	WGS	NMF	SA462324	0	0	0	1	0
UCEC	WGS	NMF	SA464675	0	0	0	1	0
UCEC	WGS	NMF	SA468892	0	0	0	0	1
UCEC	WGS	NMF	SA473193	0	1	0	0	0
UCEC	WGS	NMF	SA476431	0	0	0	1	0
UCEC	WGS	NMF	SA478484	0	0	0	1	0
UCEC	WGS	NMF	SA480023	0	1	0	0	0
UCEC	WGS	NMF	SA480113	0	0	1	0	0
UCEC	WGS	NMF	SA482408	0	0	1	0	0
UCEC	WGS	NMF	SA482767	0	0	0	1	0
UCEC	WGS	NMF	SA484286	0	0	0	1	0
UCEC	WGS	NMF	SA484672	0	0	0	1	0
UCEC	WGS	NMF	SA488516	0	1	0	0	0
UCEC	WGS	NMF	SA514311	0	1	0	0	0
UCEC	WGS	NMF	SA514319	0	0	0	0	1
UCEC	WGS	NMF	SA514358	0	0.333333	0	0	0.666667
UCEC	WGS	NMF	SA598001	0.0909091	0.381818	0.254545	0	0.272727
UCEC	WGS	NMF	SA598002	0.409091	0.590909	0	0	0
UCEC	WGS	NMF	SA598003	0.423077	0.576923	0	0	0
UCEC	WGS	NMF	SA598012	0.318841	0.137681	0.173913	0.369565	0
UCEC	WGS	NMF	SA598013	0	0.413793	0.258621	0	0.327586
UCEC	WGS	NMF	SA598014	0.408	0.168	0	0.424	0
UCEC	WGS	NMF	SA598017	0	0	0	1	0
UCEC	WGS	NMF	SA598018	0	0	0.36	0.64	0
UCEC	WGS	NMF	SA598025	0	0	0	1	0
UCEC	WGS	NMF	SA598026	0.297872	0.382979	0.319149	0	0
UCEC	WGS	NMF	SA598027	0	0	0	1	0
UCEC	WGS	NMF	SA598029	0.321429	0.285714	0.392857	0	0
UCEC	WGS	NMF	SA598040	0.44	0.56	0	0	0
UCEC	WGS	NMF	SA598046	0.2	0.2	0.4	0	0.2
UCEC	WGS	NMF	SA598062	0.351351	0.243243	0	0	0.405405
UCEC	WGS	NMF	SA598067	0.264706	0.205882	0.294118	0	0.235294
UCEC	WGS	NMF	SA599088	0.53125	0	0.46875	0	0
UCEC	WGS	NMF	SA599092	0.515152	0	0.484848	0	0
UCEC	WGS	NMF	SA599098	0.243243	0.148649	0.310811	0.297297	0
UCEC	WGS	NMF	SA599102	0.40625	0.291667	0.302083	0	0
UCEC	WGS	NMF	SA599107	0.238095	0	0	0.761905	0
UCEC	WGS	NMF	SA599112	0	1	0	0	0
UCEC	WGS	NMF	SA599118	0	1	0	0	0
UCEC	WGS	NMF	SA599123	0	1	0	0	0
UCEC	WGS	NMF	SA599132	0.380952	0	0.619048	0	0
UCEC	WGS	NMF	SA599136	0	0	1	0	0
UCEC	WGS	NMF	SA599143	0.207547	0.433962	0	0.358491	0
UCEC	WGS	NMF	SA599146	0.106061	0.318182	0.272727	0.30303	0
UCEC	WGS	NMF	SA599154	0	0.37931	0.62069	0	0
UCEC	WGS	NMF	SA599157	0	0.321429	0.678571	0	0
UCEC	WGS	NMF	SA599166	0.555556	0.444444	0	0	0
UCEC	WGS	NMF	SA599169	0.5	0.5	0	0	0
UCEC	WGS	NMF	SA599175	0	0.444444	0	0	0.555556
UCEC	WGS	NMF	SA599177	0	0.368421	0	0	0.631579
UCEC	WGS	NMF	SA601527	0	0.461538	0	0	0.538462
UCEC	WGS	NMF	SA601538	0	0.428571	0	0	0.571429
UCEC	WGS	NMF	SA601545	0	0	0	0	1
UCEC	WGS	NMF	SA601548	0	0	0	1	0
UCEC	WGS	NMF	SA601559	0.6	0.4	0	0	0
UCEC	WGS	NMF	SA601569	0	0.363636	0	0.636364	0

[truncated: 15 more sheets: (J)UCEC-WES-NMF-SBS, (K)UCEC-WES-NMF-ID, (L)UCEC-WES-NMF-DBS, (M)ovarian-WGS-NMF-SBS, (N)ovarian-WGS-NMF-ID, (O)ovarian-WGS-NMF-DBS, (P)ovarian-WES-NMF-SBS, (Q)ovarian-WES-NMF-ID, (R)ovarian-WES-NMF-DBS, (S)cervical-WGS-NMF-SBS, (T)cervical-WGS-NMF-ID, (U)cervical-WGS-NMF-DBS, (V)cervical-WES-NMF-SBS, (W)cervical-WES-NMF-ID, (X)cervical-WES-NMF-DBS]
